# Supplementary material for: Supramolecular assemblies of novel aminonucleoside phospholipids and their bonding to nucleic acids
Source: Royal Society of Chemistry journal article supplement (doi:10.1039/c4cc07538b), 2014-11-03

## Electronic Supplementary Information (ESI)

### **Supramolecular assemblies of novel aminonucleoside phospholipids and their bonding to DNA**

Delin Pan, Jing Sun, Hongwei Jin, Yating Li, Liyu Li, Yun Wu, Lihe Zhang and  
Zhenjun Yang\*

*State Key Laboratory of Natural and Biomimetic Drugs, School of Pharmaceutical Sciences, Peking University, Xue Yuan Rd. 38, Beijing 100191 (China), Fax: +86 10 82802503; Tel: +86 10 82802503; E-mail: yangzj@bjmu.edu.cn*

#### **Table of Contents**

|                                                                                               |     |
|-----------------------------------------------------------------------------------------------|-----|
| Materials and instruments                                                                     | S2  |
| Synthesis                                                                                     | S3  |
| Preparation and characterization of supramolecular structures                                 | S13 |
| Biocompatibility                                                                              | S16 |
| Cellular uptake                                                                               | S18 |
| Study on the interaction of aminonucleoside phospholipids and nucleic acids                   | S19 |
| References                                                                                    | S22 |
| $^1\text{H}$ , $^{13}\text{C}$ , $^{19}\text{F}$ and $^{31}\text{P}$ NMR spectra of compounds | S23 |

## 1. Materials and Instruments

Reagents were purchased in analytical grade or higher purity from Sigma-Aldrich or Alfa Aesar. Unless otherwise noted, materials obtained from commercial suppliers were used without further purification.  $^1\text{H}$ ,  $^{13}\text{C}$ ,  $^{19}\text{F}$  and  $^{31}\text{P}$  NMR were recorded on a Bruker AVIII-400 spectrometers. Infrared (IR) spectra were obtained using a Spectrum One Fourier transform infrared (FT-IR) spectrometer (Nexus 470, Thermo Nicolet Co. Ltd.). Mass spectra were recorded using a Xevo G2 Q-TOF spectrometer. High resolution mass spectra were recorded using an APEX IV FT-MS (7.0T) spectrometer. Ultraviolet–visible spectra were measured using a DU 800 spectrophotometer (Beckman Coulter, Inc). Circular dichroism (CD) spectra were measured using a J-810 CD spectrophotometer (Jasco, JAP). Scanning electron microscopy (SEM) images were observed on a Hitachi S-4800 scanning electron microscope at an accelerating voltage of 6 kV. Transmission electron microscopy (TEM) experiments were performed using a Philips Tacnai G2 20 S-TWIN microscope operating at 200 kV. Atomic force microscopy (AFM) images were performed using a multimode IIIa AFM (Veeco Metrology, USA) under ambient conditions. High content screening was performed on a KineticScan HCS reader (Thermo Fisher, USA).

## 2. Synthesis

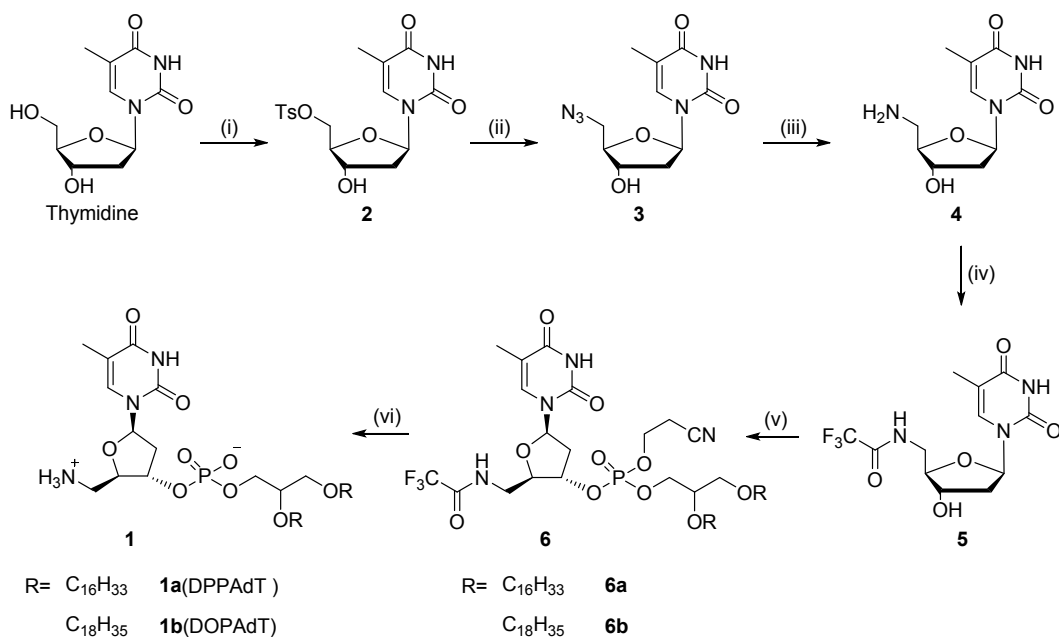

**Scheme S1.** Synthetic of Aminonucleoside Phospholipid. Conditions: (i) TsCl, py, 0 °C-r.t., 12 h, 81%; (ii) NaN<sub>3</sub>, DMF, 70 °C, 12 h, 85%; (iii) H<sub>2</sub>, Pd-C (10%), MeOH, 5 h, 95%; (iv) CF<sub>3</sub>COEt, MeOH, Ar<sub>2</sub>, -78 °C, 1 h, 80%; (v) (*i*-Pr<sub>2</sub>N)<sub>2</sub>POCH<sub>2</sub>CH<sub>2</sub>CN, HOCH<sub>2</sub>CH(OR)CH<sub>2</sub>OR, 1 H-tetrazolium, DMF, r.t.; (vi) NH<sub>3</sub>/MeOH, r.t..

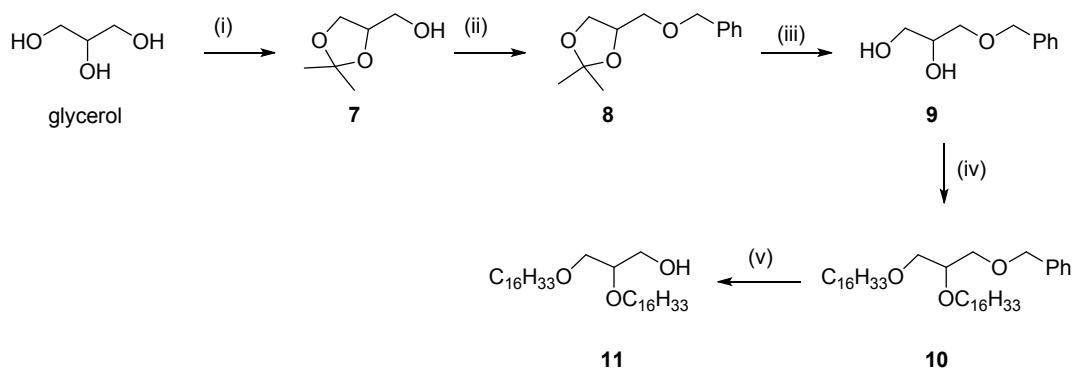

**Scheme S2.** Synthetic of 2,3-bis(hexadecyloxy)-1-benzyloxypropanol. Conditions: (i) acetone/pentane (v/v= 1/1), TsOH, reflux, 48 h, 95%; (ii) PhCH<sub>2</sub>Br, NaH, THF, 70 °C, 20 h, 89%; (iii) HCl, EtOH, r.t., 12 h, 92%; (iv) C<sub>16</sub>H<sub>33</sub>Br, KOH, benzene, 80 °C, 24 h, 81%; (v) H<sub>2</sub>, Pd-C (10%), MeOH/THF (v/v= 1/1), 36 h, 79%.

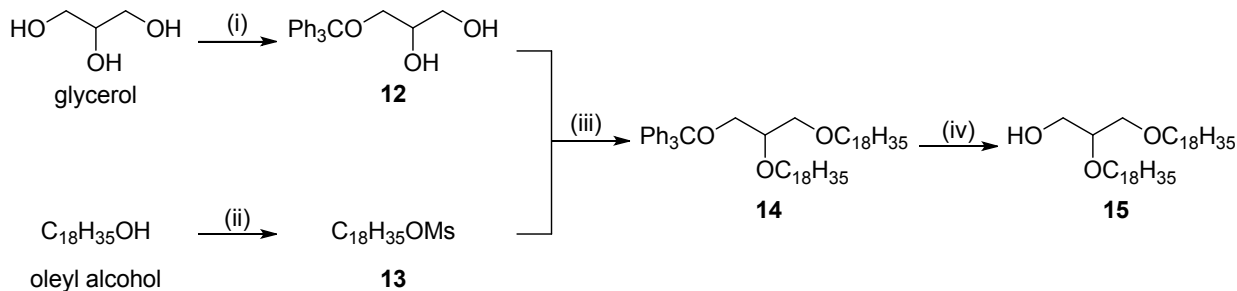

**Scheme S3.** Synthetic of 1,2-bis[(Z)-octadec-9-enyloxy] propanol. Conditions: (i)  $\text{Ph}_3\text{CCl}$ ,  $\text{Et}_3\text{N}$ , DMAP, THF, r.t., 12 h, 85%; (ii)  $\text{MsCl}$ ,  $\text{Et}_3\text{N}$ , DCM, 0 °C - r.t., 12 h, 81%; (iii)  $\text{KOH}$ , benzene, 80 °C, 36 h, 31%; (iv)  $\text{HCl}$ , THF/MeOH (v/v= 1/1), 2 h, 62%.

## 2.1 5'-O-tosyl thymidine (**2**)<sup>[1]</sup>

A solution of thymidine (24.2 g 100 mmol) in 200 ml anhydrous pyridine was cooled to 0 °C. Tosyl chloride (23g, 120 mmol) dissolved in 100 ml of pyridine was then added drop wise during 6 hours. The reaction temperature was maintained at 0 °C during the addition. The reaction mixture was stirred for additional 6 h at room temperature. Pyridine was removed the under vacuum. The residue was dissolved in 500 mL ethyl acetate and the organic layer was washed with 10%  $\text{NaHCO}_3$  solution (300 mL) followed by water. The tosyl thymidine **2** slowly crystallized out. The product was filtered and was dried under vacuum. Yield 32.6 g (81%).  $^1\text{H}$  NMR (400 MHz,  $\text{DMSO}-d_6$ ):  $\delta$  11.31 (s, 1 H), 7.80 (d,  $J$ = 8.0 Hz, 2 H), 7.48 (d,  $J$ = 8.0 Hz, 2 H), 7.39 (s, 1 H), 6.16 (t,  $J$ = 6.8 Hz, 1 H), 5.44 (d,  $J$ = 4.4 Hz, 1 H), 4.25-4.31 (m, 1 H), 4.10-4.25 (m, 2 H), 3.89 (s, 1 H), 2.42 (s, 3 H), 2.02-2.20 (m, 2 H), 1.78 (s, 3 H);  $^{13}\text{C}$  NMR (100 MHz,  $\text{DMSO}-d_6$ ):  $\delta$  163.6, 150.4, 145.1, 135.9, 132.1, 130.2, 127.6, 109.8, 84.0, 83.2, 70.1, 69.9, 38.4, 21.1, 12.0; IR (film, KBr)  $\nu$ = 3371.3, 3171.8, 3050.9, 1718.1, 1659.9, 1477.9, 1360.1, 1273.0, 1176.4, 1095.4, 1075.3, 919.5, 830.3, 552.6  $\text{cm}^{-1}$ ; MS (ESI-TOF<sup>+</sup>) for  $\text{C}_{17}\text{H}_{20}\text{N}_2\text{O}_7\text{SNa}$  [ $\text{M}+\text{Na}$ ]<sup>+</sup> found 419.1208, calcd 419.0883; Anal. calcd for  $\text{C}_{17}\text{H}_{20}\text{N}_2\text{O}_7\text{S}$ : C 51.51, H 5.09, N 7.07, Found: C 51.22, H 5.06, N 7.12.

## 2.2 5'-Azido-5'-deoxy-thymidine (**3**)<sup>[2]</sup>

A solution of 5'-O-tosyl thymidine (5 g, 12.6 mmol) and  $\text{NaN}_3$  (1.2 g, 19 mmol) in DMF (25 mL) was heated to 70 °C overnight. The reaction mixture was evaporated in vacuo. The residue was resolved in  $\text{CH}_2\text{Cl}_2$  (50 mL) and washed with  $\text{H}_2\text{O}$  (30 mL). The organic layer was dried over anhydrous sodium sulfate, evaporated, and purified by column chromatography ( $\text{CH}_2\text{Cl}_2/\text{MeOH}$ ,

20/1) to afford compound **3** (2.9 g, 85%) as a white solid.  $^1\text{H}$  NMR (400 MHz,  $\text{DMSO-}d_6$ ):  $\delta$  11.31 (s, 1 H), 7.49 (s, 1 H), 6.20 (t,  $J = 7.2$  Hz, 1 H), 5.39 (d,  $J = 4.0$  Hz, 1 H), 4.20 (s, 1 H), 3.79-3.85 (m, 1 H), 3.56 (d,  $J = 5.2$  Hz, 2 H), 2.20-2.30 (m, 1 H), 2.05-2.15 (m, 1 H), 1.79 (s, 3 H);  $^{13}\text{C}$  NMR (100 MHz,  $\text{DMSO-}d_6$ ):  $\delta$  163.7, 150.5, 136.1, 109.8, 84.6, 83.9, 70.7, 51.6, 38.1, 12.1; IR (film, KBr)  $\nu =$  3391.8, 3189.4, 2925.5, 2807.3, 2101.1, 1722.3, 1656.2, 1477.2, 1433.2, 1298.8, 1272.8, 1067.3, 963.4, 856.2, 636.4, 553.4, 493.8  $\text{cm}^{-1}$ ; MS (ESI-TOF $^+$ ) for  $\text{C}_{10}\text{H}_{13}\text{N}_5\text{O}_4\text{Na}$   $[\text{M}+\text{Na}]^+$  found 290.1042, calcd 290.0860; Anal. calcd for  $\text{C}_{10}\text{H}_{13}\text{N}_5\text{O}_4$ : C 44.94, H 4.90, N 26.21, Found: C 45.03, H 4.93, N 25.79.

### 2.3 5'-Amino-5'-deoxy-thymidine (**4**)<sup>[2]</sup>

A solution of **3** (5.5 g, 20 mmol) in methanol (150 mL) was hydrogenated using 10% Pd-C catalyst (0.55 g) for 5 h, at 60 Psi pressure. The catalyst was removed by filtration through Celite and the filtrate was evaporated to give a yellow solid. The yellow solid was dissolved in water and applied to a column of Dowex 50 WX4 (200-400 mesh). The column was eluted with methanol (300 mL), then with water (500 mL), and finally eluted with 1 N ammonium hydroxide to give **4** as a white solid. (4.7 g, 95%).  $^1\text{H}$  NMR (400 MHz,  $\text{DMSO-}d_6$ ):  $\delta$  7.65 (s, 1 H), 6.15 (t,  $J = 7.0$  Hz, 1 H), 4.75 (br s, 4 H), 4.18-4.23 (m, 1 H), 3.60-3.70 (m, 1 H), 2.65-2.80 (m, 2 H), 2.01-2.23 (m, 2 H), 1.79 (s, 3 H);  $^{13}\text{C}$  NMR (100 MHz,  $\text{DMSO-}d_6$ ):  $\delta$  163.8, 150.5, 136.2, 109.6, 87.8, 83.4, 70.8, 43.6, 38.90, 12.1; IR (film, KBr)  $\nu$  3348.7, 3288.9, 2948.5, 2638.8, 1999.1, 1694.1, 1449.3, 1369.9, 1274.8, 1136.7, 1075.2, 954.7, 770.6, 620.9, 560.9  $\text{cm}^{-1}$ ; MS (ESI-TOF $^+$ ) for  $\text{C}_{10}\text{H}_{15}\text{N}_3\text{O}_4\text{Na}$   $[\text{M}+\text{Na}]^+$  found 264.1148, calcd 264.0955; Anal. calcd for  $\text{C}_{10}\text{H}_{15}\text{N}_3\text{O}_4$ : C 49.79, H 6.27, N 17.42, Found: C 49.50, H 6.20, N 17.25.

### 2.4 5'-Trifluoroacetamide-5'-deoxy-thymidine (**5**)

To a solution of **4** (2.0 g, 8.3 mmol) in methanol (50 ml), at  $-78$  °C under nitrogen, ethyl trifluoroacetate (1.2 g, 8.4 mmol) was added dropwise over 30 min. Stirring was continued for a further 30 min, and then the reaction mixture was slowly allowed to warm to room temperature. Large amount of white precipitate was formed. The precipitate was obtained by filtration, washed successively with methanol (10 mL) and ethyl acetate (10 mL) to give pure **5** as a white solid (2.2 g, 85%).  $^1\text{H}$  NMR (400 MHz,  $\text{DMSO-}d_6$ ):  $\delta$  10.91 (brs,  $< 1$  H), 9.62 (s, 1 H), 7.45 (s, 1 H), 6.14 (t,  $J = 7.0$  Hz, 1 H), 5.38 (d,  $J = 4.0$  Hz, 1 H), 4.18 (brs, 1 H), 3.77-3.87 (m, 1 H), 3.30-3.51 (m, 2 H), 2.13-

1.25 (m, 1 H), 2.00-2.12 (m, 1 H), 1.79 (s, 3 H);  $^{13}\text{C}$  NMR (100 MHz, DMSO- $d_6$ ):  $\delta$  163.8, 156.7 (q,  $J$ = 36.1 Hz), 150.5, 136.1, 116.0 (q,  $J$ = 286.4 Hz), 109.8, 84.0, 83.8, 71.2, 41.7, 38.3, 12.0;  $^{19}\text{F}$  NMR (400 MHz,  $\text{CDCl}_3$ ):  $\delta$  -74.233; IR (film, KBr)  $\nu$  3395.3, 3325.2, 2945.5, 1727.5, 1696.8, 1653.5, 1565.4, 1480.7, 1271.8, 1210.2, 1181.4, 1092.5, 1046.5, 844.5, 697.6 613.7  $\text{cm}^{-1}$ ; MS (ESI-TOF $^+$ ) for  $\text{C}_{12}\text{H}_{14}\text{F}_3\text{N}_3\text{O}_5\text{Na}$   $[\text{M}+\text{Na}]^+$  found 360.1181, calcd 360.0778; Anal. calcd for  $\text{C}_{12}\text{H}_{14}\text{F}_3\text{N}_3\text{O}_5$ : C 42.74, H 4.18, N 12.46, Found: C 42.49, H 4.34, N 12.26.

### 2.5 Dipalmityl-3'-(cyanoethyl)phosphatidyl-5'- trifluoroacetamide -5'-deoxy-thymidine (**6a**)

To a solution of **5** (337 mg, 1.0 mmol) and 1 H tetrazolium (140 mg, 2.0 mmol) in dry DMF (20 mL) under nitrogen, *N,N,N',N'*-tetraisopropyl-*O*-2-(cyanoethyl)phosphorodiamidite (360 mg, 1.2 mmol) was added dropwise, and the solution was stirred at room temperature for 2 h. After that, 1,2-bis(hexadecyloxy)propanol (864 mg, 1.6 mmol) and 1 H tetrazolium (140 mg, 2.0 mmol) were added to the solution, which was stirred under nitrogen for another 12 h.  $\text{H}_2\text{O}_2$  (30%, 5 mL) was then added to the solution, and stirring was continued for a further 1h. The solution was concentrated in vacuo and purified by column chromatography over silica with dichloromethane/methanol (20/1) as the eluting solvent. Product was obtained as a white solid in 31% (313 mg) yield.  $^1\text{H}$  NMR (400 MHz,  $\text{CDCl}_3$ ):  $\delta$  8.80-8.95 (m, 1 H), 7.76-7.95 (m, 1 H), 7.09 (d,  $J$ = 8.4 Hz, 1 H), 5.90-6.10 (m, 1 H), 5.02 (s, 1 H), 4.15-4.45 (m, 5 H), 3.35-3.80 (m, 9 H), 2.81 (s, 2 H), 2.60 (s, 2 H), 1.93 (s, 3 H), 1.50-1.60 (m, 4 H), 1.25 (brs, 52 H), 0.88 (t,  $J$ = 6.6 H, 6 H);  $^{13}\text{C}$  NMR (100 MHz,  $\text{CDCl}_3$ ):  $\delta$  164.15, 158.12 (q,  $J$ = 37 Hz), 150.55, 136.92, 116.73, 115.96 (q,  $J$ = 286.5 Hz), 111.74, 111.69, 87.27, 82.62, 78.00, 71.97, 70.78, 69.12, 68.29, 62.51, 57.77, 40.96, 37.45, 31.97, 30.04, 29.76, 29.71, 29.66, 29.54, 29.41, 26.12, 26.05, 22.73, 21.55, 19.73, 14.15, 12.23;  $^{31}\text{P}$  NMR (161 MHz,  $\text{CDCl}_3$ ):  $\delta$  -2.168, -2.269, -2.316;  $^{19}\text{F}$  NMR (400 MHz,  $\text{CDCl}_3$ ):  $\delta$  -75.585, -75.622, -75.630; IR (film, KBr)  $\nu$  3433.4, 2920.2, 2852.1, 1719.9, 1468.9, 1278.5, 1160.1, 1034.0, 722.6  $\text{cm}^{-1}$ ; MS (ESI-TOF $^+$ ) for  $\text{C}_{50}\text{H}_{88}\text{N}_4\text{F}_3\text{O}_{10}\text{PNa}$   $[\text{M}+\text{Na}]^+$  found 1015.6692, calcd 1015.6082; HRMS (ESI-MS) for  $\text{C}_{50}\text{H}_{88}\text{N}_4\text{F}_3\text{O}_{10}\text{PNa}$   $[\text{M}+\text{Na}]^+$  found 1015.6111, calcd 1015.6082; Anal. calcd for  $\text{C}_{50}\text{H}_{88}\text{N}_4\text{F}_3\text{O}_{10}\text{P}$ : C 60.46, H 8.93, N 5.64, Found: C 60.23, H 8.99, N 5.65.

### 2.6 Dioleoyl-3'-(cyanoethyl)phosphatidyl-5'- trifluoroacetamide -5'-deoxy-thymidine (**6b**)

To a solution of **5** (337 mg, 1.0 mmol) and 1 H tetrazolium (140 mg, 2.0 mmol) in dry DMF (20 mL) under nitrogen, *N,N,N',N'*-tetraisopropyl-*O*-2-(cyanoethyl)phosphorodiamidite (360 mg, 1.2 mmol) was added dropwise, and the solution was stirred at room temperature for 2 h. After that, 1,2-

bis[(Z)-octadec-9-enyloxy]propanol (950 mg, 1.6 mmol) and 1 H tetrazolium (140 mg, 2.0 mmol) were added to the solution, which was stirred under nitrogen for another 12 h. H<sub>2</sub>O<sub>2</sub> (30%, 5 mL) was then added to the solution, and stirring was continued for a further 1h. The solution was concentrated in vacuo and purified by column chromatography over silica with dichloromethane/methanol (20/1) as the eluting solvent. Product was obtained as pale yellow oil in 33% (344 mg) yield. <sup>1</sup>H NMR (400 MHz, CDCl<sub>3</sub>): δ 9.91 (s, <1 H), 7.75-8.40 (m, 1 H), 7.08 (m, 1 H), 5.99 (m, 1 H), 5.32 (m, 4 H), 4.95-5.15 (m, 1 H), 4.05-4.45 (m, 4 H), 3.30-3.80 (m, 11 H), 2.79 (s, 1 H), 2.52 (s, 2 H), 1.80-2.02 (m, 11 H), 1.53 (brs, 4 H), 1.26 (brs, 44 H), 0.86 (brs, 6 H); <sup>13</sup>C NMR (100 MHz, CDCl<sub>3</sub>): δ 164.16, 158.00 (q, *J* = 37.8 Hz), 150.57, 150.52, 136.64, 130.35, 130.21, 129.88, 129.74, 116.68, 115.90 (q, *J* = 292.3 Hz), 86.94, 82.73, 71.82, 70.64, 69.11, 68.97, 68.21, 66.53, 66.14, 62.41, 40.86, 37.72, 37.41, 32.57, 31.87, 29.73, 29.49, 29.28, 27.17, 26.04, 25.97, 22.64, 19.59, 14.06, 12.14; <sup>31</sup>P NMR (161 MHz, CDCl<sub>3</sub>): δ 14.120, 9.141, 9.086, 8.945, 8.882, -2.173, -2.257, -2.329; <sup>19</sup>F NMR (400 MHz, CDCl<sub>3</sub>): δ -75.562, -75.549; IR (film, KBr) ν 3240.3, 3083.6, 3004.9, 2925.2, 2854.5, 1723.1, 1560.3, 1465.7, 1216.7, 1184.1, 1159.2, 1039.5, 971.2, 725.0; MS (ESI-TOF<sup>+</sup>) for C<sub>54</sub>H<sub>92</sub>N<sub>4</sub>F<sub>3</sub>O<sub>10</sub>PNa [M+Na]<sup>+</sup> found 1067.8557, calcd 1067.6395; HRMS (ESI-MS) for C<sub>54</sub>H<sub>96</sub>N<sub>5</sub>F<sub>3</sub>O<sub>10</sub>P [M+NH<sub>4</sub>]<sup>+</sup> found 1062.6865, calcd 1062.6841.

## 2.7 Dipalmityl-3'-phosphatidyl-5'-Amino-5'-deoxy-thymidine (**1a**, DPPAdT)

**6a** (100 mg, 0.1 mmol) was dissolved in methanol-ammonia (20 mL) and stirred at room temperature for 10 h. After that, the solvent was evaporated to give a yellow residual. The desired product (51 mg, 60%) was isolated after chromatography (Sephadex LH 20, DCM/MeOH 1/1) as a white solid. <sup>1</sup>H NMR (400 MHz, CDCl<sub>3</sub>-CD<sub>3</sub>OD): δ 7.40-7.52 (m, <1 H), 7.20-7.40 (m, 1 H), 5.95-6.20 (m, 1 H), 4.60-4.95 (m, 1 H), 3.76-4.20 (m, 2 H), 3.25-3.73 (m, 10 H), 2.40-2.95 (m, 2 H), 1.76-1.98 (m, 3 H), 1.54 (brs, 4 H), 1.27 (brs, 52 H), 0.87 (brs, 6 H); <sup>13</sup>C NMR (100 MHz, CDCl<sub>3</sub>): δ 164.49, 150.51, 137.82, 110.96, 87.38, 85.39, 83.01, 81.00, 74.95, 71.56, 70.42, 41.01, 40.54, 37.79, 37.28, 31.68, 29.75, 29.42, 29.31, 29.12, 25.81, 22.42, 13.68, 11.65; <sup>31</sup>P NMR (161 MHz, CDCl<sub>3</sub>): δ -1.227; IR (film, KBr) ν 3504.5, 2921.8, 2852.5, 1695.9, 1468.7, 1370.7, 1218.5, 834.8 cm<sup>-1</sup>; MS (ESI-TOF<sup>+</sup>) for C<sub>45</sub>H<sub>86</sub>N<sub>3</sub>O<sub>9</sub>PNa [M+Na]<sup>+</sup> found 866.8617, calcd 866.5994; HRMS (ESI-MS) for C<sub>45</sub>H<sub>87</sub>N<sub>3</sub>O<sub>9</sub>P [M+H]<sup>+</sup> found 844.61846, calcd 844.61744; Anal. calcd for C<sub>45</sub>H<sub>86</sub>N<sub>3</sub>O<sub>9</sub>P: C 64.03, H 10.27, N 4.98, Found: C 64.31, H 9.91, N 5.21.

## 2.8 Dioleoyl-3'-phosphatidyl-5'-Amino-5'-deoxy-thymidine (**1b**, DOPAdT)

**6b** (100 mg, 0.096 mmol) was dissolved in methanol-ammonia (20 mL) and stirred at room temperature for 10 h. After that, the solvent was evaporated to give a yellow residual. The desired product (55 mg, 64%) was isolated after chromatography (Sephadex LH 20, DCM/MeOH 1/1) as a white solid. <sup>1</sup>H NMR (400 MHz, CDCl<sub>3</sub>-CD<sub>3</sub>OD): δ 8.80-9.26 (m, 1 H), 8.20-8.80 (m, 1 H), 7.15-7.25 (m, <1 H), 6.90-7.15 (m, <1 H), 5.60-5.90 (m, 1 H), 5.25-5.50 (m, 4 H), 4.75-5.15 (m, 1 H), 4.20-4.40 (m, 1 H), 3.20-3.95 (m, 12 H), 2.70-3.00 (m, 1 H), 2.40-2.60 (m, 1 H), 1.85-2.25 (m, 11 H), 1.51 (brs, 4 H), 1.27 (brs, 44 H), 0.88 (t, *J* = 5.8 Hz, 6 H); <sup>13</sup>C NMR (100 MHz, CDCl<sub>3</sub>): δ 130.13, 129.90, 100.13, 71.95, 70.79, 70.45, 32.78, 32.05, 31.05, 30.28, 29.96, 29.91, 29.73, 29.51, 27.39, 26.27, 22.87, 19.24, 14.30, 12.39; <sup>31</sup>P NMR (161 MHz, CDCl<sub>3</sub>): δ -0.494; IR (film, KBr) ν 3434.7, 2925.5, 2854.2, 1703.8, 1667.3, 1466.3, 1280.1, 1222.9, 1098.4, 1070.7, 613.4; MS (ESI-TOF<sup>+</sup>) for C<sub>49</sub>H<sub>91</sub>N<sub>3</sub>O<sub>9</sub>P [M+H]<sup>+</sup> found 896.8428, calcd 896.6487; HRMS (ESI-MS) for C<sub>49</sub>H<sub>91</sub>N<sub>3</sub>O<sub>9</sub>P [M+H]<sup>+</sup> found 896.6516, calcd 896.6487.

## 2.9 Isopropylidene glycerol (**7**)<sup>[3]</sup>

Glycerol (20 g, 217 mmol), acetone (60 ml), pentane (60 ml) and *p*-toluenesulfonic acid monohydrate (500 mg, 2.9 mmol) were successively introduced into a vessel fitted with a Dean-Stark. The mixture was then stirred at reflux for 48 h. After cooling to room temperature, sodium acetate (300 mg, 4.5 mmol) was added. The mixture was filtered and the solvents were evaporated under reduced pressure to give the pure alcohol (27.1 g, 95%) as yellow oil. b.p. 81 °C at 11 mmHg. <sup>1</sup>H NMR (400 MHz, CDCl<sub>3</sub>): δ 4.21-4.28 (m, 1 H), 4.04 (dd, *J* = 8.0, 2.8 Hz, 1 H), 3.77-3.83 (m, 1 H), 3.74 (dd, *J* = 7.6, 3.6 Hz, 1 H), 3.60 (dd, *J* = 12.0, 5.2 Hz, 1 H), 2.22 (brs, 1 H), 1.45 (s, 3 H), 1.38 (s, 3 H); <sup>13</sup>C NMR (100 MHz, CDCl<sub>3</sub>): δ 109.4, 76.1, 65.7, 63.0, 26.7, 25.2; IR (neat): ν 3442.0, 2987.4, 2937.1, 2883.5, 1744.5, 1456.9, 1374.1, 1256.3, 1214.4, 1156.8, 1078.3, 1052.4, 971.3, 844.5, 792.5, 516.2 cm<sup>-1</sup>; MS(ESI-TOF<sup>+</sup>) for C<sub>6</sub>H<sub>12</sub>O<sub>3</sub>Na [M+Na]<sup>+</sup> found 155.0773, calcd 155.0679.

## 2.10 1,2-*O*-Isopropylidene-3-*O*-benzyl-glycerol (**8**)<sup>[4]</sup>

A solution of **7** (21.2 g, 160 mmol) in anhydrous THF (50 mL) was stirred with sodium hydride (8.7 g, 57-63% in oil, 344 mmol) for 30 min in room temperature. Benzyl bromide (28 g, 176 mmol) was added to the sodium alkoxide solution, and the mixture was refluxed for 20 h. The mixture was then cooled, added with water, and extracted with ethyl acetate (3 × 250 mL). The organic solution



was dried with anhydrous sodium sulfate and concentrated to give a residue. Flash chromatography with petroleum ether/ethyl acetate (10/1) gave 31.5 g of **8** (89%) as a colorless oil. <sup>1</sup>H NMR (400 MHz, CDCl<sub>3</sub>): δ 7.25-7.45 (m, 5 H), 4.57 (dd, *J*= 18, 12 Hz, 2 H), 4.25-4.34 (m, 1 H), 4.05 (dd, *J*= 8.2, 6.6 Hz, 1 H), 3.74 (dd, *J*= 8.2, 6.2 Hz, 1 H), 3.56 (dd, *J*= 9.8, 5.8 Hz, 1 H), 3.47 (dd, *J*= 9.6, 5.6 Hz, 1 H), 1.42 (s, 3 H), 1.36 (s, 3 H); <sup>13</sup>C NMR (100 MHz, CDCl<sub>3</sub>): δ 138.1, 128.5, 127.8, 109.5, 74.9, 73.6, 71.3, 67.0, 26.9, 25.5; IR (neat): ν 3063.8, 3030.8, 2986.4, 2934.5, 2866.4, 1954.4, 1813.1, 1604.1, 1496.2, 1454.0, 1371.5, 1254.8, 1212.8, 1156.8, 1095.8, 1053.6, 845.0, 738.4, 698.9, 606.2, 515.4 cm<sup>-1</sup>; HRMS (ESI-MS) for C<sub>13</sub>H<sub>19</sub>O<sub>3</sub> [M+H]<sup>+</sup> found 223.1323, calcd 223.1329.

### 2.11 3-*O*-Benzyl-glycerol (**9**)<sup>[4]</sup>

11.1 g (50 mmol) of **8** was dissolved in ethanol (60 mL) and acidified with 1 M HCl (60 mL). The solution was allowed to stand at room temperature for 12 h before being neutralized with aqueous NaHCO<sub>3</sub> solution and extracted with ether (3×80 mL). The organic solution was dried with anhydrous sodium sulfate. Solvent evaporation and flash chromatography with petroleum ether/ethyl acetate (5/1) yielded 8.3 g of **9** (92%) as a colorless oil. <sup>1</sup>H NMR (400 MHz, DMSO-*d*<sub>6</sub>): δ 7.25-7.45 (m, 5 H), 4.48 (s, 2 H), 3.58-3.70 (m, 1 H), 3.40-3.50 (m, 1 H), 3.27-3.40 (m, 5 H); <sup>13</sup>C NMR (100 MHz, DMSO-*d*<sub>6</sub>): δ 138.7, 128.3, 127.5, 127.4, 72.4, 72.0, 70.6, 63.2; IR (neat) ν 3382.9, 2868.9, 1957.0, 1495.8, 1453.4, 1364.5, 1325.7, 1207.7, 1073.4, 925.9, 865.5, 739.8, 699.0, 611.2 cm<sup>-1</sup>; MS (ESI-TOF<sup>+</sup>) for C<sub>10</sub>H<sub>14</sub>O<sub>3</sub>Na [M+Na]<sup>+</sup> found 205.0989, calcd 205.0835.

### 2.12 2,3-Bis(hexadecyloxy)-1-benzyloxypropanol (**10**)<sup>[5]</sup>

A mixture of **9** (7.5 g, 41.2 mmol), powdered potassium hydroxide (7.8 g, 140 mmol), and bromohexadecane (37.8 g, 124 mmol) in dry benzene (150 mL) was refluxed for 24 h with continuous stirring. The water formed during the reaction was removed by using a Dean-Stark apparatus. The reaction mixture was cooled to room temperature, diluted with ethyl acetate (250 mL), and washed successively with water (250 mL), 1 N HCl (250 mL), and 2.5% NaHCO<sub>3</sub> solution (250 mL), water (250 mL) and brine (250 mL). The organic layer was dried over anhydrous sodium sulfate. The product was purified by column chromatography over silica gel using petroleum ether/ethyl acetate (20/1). A viscous oily compound was isolated in 81% (21 g) yield. <sup>1</sup>H NMR (400 MHz, CDCl<sub>3</sub>): δ 7.23-7.40 (m, 5 H), 4.55 (s, 2 H), 3.30-3.65 (m, 9 H), 1.50-1.60 (m, 4 H), 1.26 (brs, 52 H), 0.88 (t, *J*= 6.8 Hz, 6 H); <sup>13</sup>C NMR (100 MHz, CDCl<sub>3</sub>): δ 138.62, 128.43, 127.70, 127.61,

78.10, 73.50, 71.80, 70.91, 70.76, 70.49, 32.08, 30.27, 29.86, 29.81, 29.80, 29.66, 29.51, 26.29, 26.26, 22.84, 14.24; IR (film, KBr)  $\nu$  3064.3, 3030.1, 2923.7, 2853.2, 1943.8, 1464.5, 1366.4, 1304.3, 1115.6, 1028.9, 732.5, 697.3  $\text{cm}^{-1}$ ; MS (ESI-TOF<sup>+</sup>) for  $\text{C}_{42}\text{H}_{78}\text{O}_3\text{Na}$   $[\text{M}+\text{Na}]^+$  found 653.6257, calcd 653.5843; Anal. calcd for  $\text{C}_{42}\text{H}_{78}\text{O}_3$ : C 79.94, H 12.46, Found: C 79.80, H 12.56.

### 2.13 1,2-Bis(hexadecyloxy)propanol (**11**)<sup>[5]</sup>

A solution of **10** (12 g, 19 mmol) in (1:1) mixture of methanol and ethyl acetate (100 mL) was hydrogenated using 10% Pd-C catalyst (1.2 g) for 36 h, at 60 Psi pressure, during which almost all the starting material was converted to the alcohol. Then, Pd-C was filtered off and the solvent was removed. The solid obtained was dissolved in hot ethyl acetate and kept at room temperature for recrystallization. The solid was filtered and washed with hexane. The resulting solid was recrystallized several times to get pure, white solid. The rest of the compound, which was in filtrate, was purified by column chromatography over silica with petroleum ether/ethyl acetate (10/1) as the eluting solvent. The products were combined to give 8.1 g of **11** as a white solid, and the overall yield after purification was 79%. <sup>1</sup>H NMR (400 MHz,  $\text{CDCl}_3$ ):  $\delta$  3.27-3.76 (m, 9 H), 1.52-1.60 (m, 4 H), 1.26 (brs, 52 H), 0.88 (t,  $J$  = 6.8 Hz, 6 H); <sup>13</sup>C NMR (100 MHz,  $\text{CDCl}_3$ ):  $\delta$  78.45, 72.00, 71.08, 70.55, 63.25, 32.08, 30.24, 29.85, 29.77, 29.62, 29.51, 26.26, 22.83, 14.24; IR (film, KBr)  $\nu$  3472.1, 2919.3, 2850.4, 1468.9, 1379.1, 1353.4, 1114.5, 1081.1, 856.6, 722.1, 677.5  $\text{cm}^{-1}$ ; MS (ESI-TOF<sup>+</sup>) for  $\text{C}_{35}\text{H}_{72}\text{O}_3\text{Na}$   $[\text{M}+\text{Na}]^+$  found 563.5786, calcd 563.5374; Anal. calcd for  $\text{C}_{35}\text{H}_{72}\text{O}_3$ : C 77.71, H 13.42, Found: C 77.47, H 13.25.

### 2.14 1-(Triphenylcarbinyl)glycerol (**12**)<sup>[6]</sup>

Glycerol (40.0 g, 435 mmol), trityl chloride (30 g, 107 mmol), and DMAP (300 mg, 2.46 mmol) were placed in a 250 mL round-bottom flask containing 80 mL of dry THF. To this heterogeneous mixture was added  $\text{Et}_3\text{N}$  (18 mL), and the resultant mixture was vigorously stirred at room temperature overnight. Ethyl acetate (150 mL) and water (100 mL) were then added to the flask. The reaction mixture was transferred to a separatory funnel, the solution was shaken, the layers were separated, and the organic layer was collected. The aqueous layer was then further extracted with ethyl acetate (2 $\times$ 100 mL). The combined organic layers were washed sequentially with 10%  $\text{NaHCO}_3$  (200 mL), water (200 mL) and brine (200 mL), and dried over anhydrous sodium sulfate. Solvent was then removed on a rotovap to yield a yellow oil which was recrystallized with a

benzene/hexanes mixture to give 29 g of a white solid (85% yield).  $^1\text{H}$  NMR (400 MHz,  $\text{CDCl}_3$ ):  $\delta$  7.38-7.48 (m, 6 H), 7.20-7.35 (m, 9 H), 3.84 (s, 1 H), 3.63-3.71 (m, 1 H), 3.53-3.63 (m, 1 H), 3.20-3.28 (m, 2 H), 2.74 (brs, 1 H), 2.35 (brs, 1 H);  $^{13}\text{C}$  NMR (100 MHz,  $\text{CDCl}_3$ ):  $\delta$  143.8, 128.7, 128.0, 127.3, 87.1, 71.3, 65.1, 64.4; IR (film, KBr)  $\nu$  3380.8, 3058.1, 2920.0, 2866.8, 1490.0, 1447.8, 1081.5, 1028.5, 699.8; MS (EI) for  $\text{C}_{22}\text{H}_{22}\text{O}_3$   $[\text{M}]^+$  found 334.5, calcd 334.2; Anal. calcd for  $\text{C}_{22}\text{H}_{22}\text{O}_3$ : C 79.02, H 6.63, Found: C 79.26, H 6.49.

### 2.15 1-[(Methylsulfonyl)oxy]-(Z)-octadec-9-ene (**13**)<sup>[4]</sup>

Oleyl alcohol (50 85% purity, 158 mmol) and  $\text{Et}_3\text{N}$  (40 mL, 286 mmol) were dissolved in  $\text{CH}_2\text{Cl}_2$  (500 mL) and cooled to 0 °C. To this solution was slowly added  $\text{MsCl}$  (16 mL, 206 mmol). A white precipitate was observed during the addition. The reaction mixture was then slowly allowed to warm to room temperature and stirred vigorously overnight. Water (250 mL) was added to the solution, and the mixture was transferred to a separatory funnel. The mixture was shaken, the layers were separated, and the organic layer was collected. The aqueous layer was further extracted with  $\text{CH}_2\text{Cl}_2$  (2 $\times$ 500 mL). The combined organic layers were then washed with 1 N  $\text{HCl}$  (250 mL), 10%  $\text{NaHCO}_3$  (250 mL) and brine, and dried over anhydrous sodium sulfate. The solution was concentrated in vacuo to give a brown oil, which was purified by column chromatography over silica with petroleum ether/ethyl acetate (20/1) as the eluting solvent. Product was obtained as colorless oil in 81% (44 g) yield.  $^1\text{H}$  NMR (400 MHz,  $\text{CDCl}_3$ ):  $\delta$  5.30-5.43 (m, 2 H), 4.22 (t,  $J$ = 6.6 Hz, 2 H), 3.00 (s, 3 H), 1.90-2.10 (m, 4 H), 1.70-1.80 (m, 2 H), 1.20-1.40 (m, 22 H), 0.88 (t,  $J$ = 6.8 Hz, 3 H);  $^{13}\text{C}$  NMR (100 MHz,  $\text{CDCl}_3$ ):  $\delta$  130.2, 129.9, 70.3, 37.5, 32.0, 29.90, 29.83, 29.66, 29.46, 29.29, 29.26, 29.15, 27.36, 27.30, 25.6, 22.8, 14.3; IR (neat)  $\nu$  2925.5, 2854.5, 1463.6, 1355.9, 1175.4, 974.8, 947.8, 831.7, 721.6, 528.8; MS (ESI-TOF<sup>+</sup>) for  $\text{C}_{19}\text{H}_{38}\text{O}_3\text{SNa}$   $[\text{M}+\text{Na}]^+$  found 369.2315, calcd 369.2434; Anal. calcd for  $\text{C}_{19}\text{H}_{38}\text{O}_3\text{S}$ : C 65.85, H 11.05, Found: C 65.63, H 10.98.

### 2.16 1-[(Triphenylcarbinyl)oxy]-2,3-bis[(Z)-octadec-9-enyloxy]propane (**14**)<sup>[6]</sup>

A mixture of **12** (8.0 g, 23.1 mmol), **13** (19.2 g, 55.42 mmol) and powdered potassium hydroxide (3.3 g, 58.9 mmol) in dry benzene (150 mL) was refluxed for 36 h with continuous stirring. The water formed during the reaction was removed by using a Dean-Stark apparatus. The reaction was then cooled to room temperature, and then ethyl acetate (150 mL) and water (150 mL) were added to the mixture. The mixture was shaken, and the layers were separated. The aqueous layer was

extracted with ethyl acetate (3×100 mL). The combined organics were washed with water (150 mL) and brine (150 mL), and dried over anhydrous sodium sulfate. The solution was concentrated in vacuo, and the oily residue was chromatographed, eluting with petroleum ether/ethyl acetate (20/1) to obtain 6.1 g of **14** as colorless oil (31% yield). <sup>1</sup>H NMR (400 MHz, CDCl<sub>3</sub>): δ 7.40-7.50 (m, 6 H), 7.18-7.32 (m, 9 H), 5.26-5.43 (m, 4 H), 3.50-3.60 (m, 5 H), 3.35-3.45 (m, 2 H), 3.12-3.20 (m, 2 H), 1.92-2.08 (m, 8 H), 1.50-1.58 (m, 4 H), 1.26 (brs, 44 H), 0.88 (t, *J*= 6.6 Hz, 6 H); <sup>13</sup>C NMR (100 MHz, CDCl<sub>3</sub>): δ 144.31, 130.07, 130.00, 128.90, 127.85, 127.02, 86.64, 78.45, 71.76, 71.33, 70.84, 63.73, 32.77, 32.06, 30.28, 29.94, 29.93, 29.85, 29.82, 29.72, 29.68, 29.65, 29.47, 27.37, 27.06, 26.31, 26.25, 22.84, 14.27; IR (film, KBr) ν 3004.4, 2925.3, 2854.1, 1742.6, 1597.7, 1490.7, 1450.0, 1220.6, 1118.7, 763.9, 745.0, 704.1, 632.8 cm<sup>-1</sup>; MS (ESI-TOF<sup>+</sup>) for C<sub>58</sub>H<sub>90</sub>O<sub>3</sub>Na [M+Na]<sup>+</sup> found 857.9059, calcd 857.6782; Anal. calcd for C<sub>58</sub>H<sub>90</sub>O<sub>3</sub>: C 83.39, H 10.86, Found: C 83.10, H 10.62.

#### 2.17 1,2-Bis[(*Z*)-octadec-9-enyloxy]propanol (**15**)

A solution of **14** (8.34 g, 10 mmol) in (1:1) mixture of methanol and THF (100 mL) was acidified with 12 M HCl (2 mL), and stirred at room temperature for 2 h. The solvent was concentrated, neutralized with aqueous NaHCO<sub>3</sub> solution (5%, 100 mL) and extracted with ethyl acetate (100 mL×3). The combined organic layers were then washed with brine and dried over anhydrous sodium sulfate. The solution was concentrated in vacuo and purified by column chromatography over silica with petroleum ether/ethyl acetate (20/1) as the eluting solvent. Product was obtained as pale yellow oil in 62% (3.7 g) yield. <sup>1</sup>H NMR (400 MHz, CDCl<sub>3</sub>): δ 5.30-5.45 (m, 4 H), 3.40-3.75 (m, 9 H), 2.18 (s, 1 H), 1.90-2.10 (m, 8 H), 1.55-1.65 (m, 4 H), 1.25-1.40 (brs, 44 H), 0.88 (t, *J*= 6.4 Hz, 6 H); <sup>13</sup>C NMR (100 MHz, CDCl<sub>3</sub>): δ 130.10, 129.97, 78.39, 72.00, 71.07, 70.54, 63.27, 32.06, 30.23, 29.92, 29.85, 29.81, 29.77, 29.67, 29.65, 29.60, 29.47, 29.41, 27.36, 26.25, 22.83, 14.25; IR (film, KBr) ν 3470.1, 3004.4, 2925.4, 2854.0, 1651.2, 1463.2, 1376.2, 1117.5, 1041.3, 968.0, 721.9 cm<sup>-1</sup>; MS (ESI-TOF<sup>+</sup>) for C<sub>39</sub>H<sub>76</sub>O<sub>3</sub>Na [M+Na]<sup>+</sup> found 615.7213, calcd 615.5687; Anal. calcd for C<sub>39</sub>H<sub>76</sub>O<sub>3</sub>: C 78.99, H 12.92, Found: C 78.72, H 12.68

### 3. Preparation and Characterization of Supramolecular Structures

#### 3.1 Multilamellar Organization

DPPAdT (8.43 mg, 10  $\mu\text{mol}$ ) was suspended in water (1 mL) and sonicated at 70  $^{\circ}\text{C}$  for 10 min to give a clear solution. After that the solution was cooled to 25  $^{\circ}\text{C}$  and aged at this temperature for 1 week. White precipitate was formed during this time. The solution was shocked and diluted to 0.1 mM with water, and then its UV-vis spectra and absorbance at 260 nm versus temperature were recorded. To prepare SEM sample, a drop of this solution was allowed to air-dry onto a mica sheet and then gold shadowed. 5'-amino-5'-deoxythymidine (2.41 mg, 10  $\mu\text{mol}$ ) was dissolved in water (1 mL), and then diluted to 100  $\mu\text{M}$ . Its UV-vis spectra at 260 nm versus temperature were recorded on the same spectrometer.

#### 3.2 Hydrogel

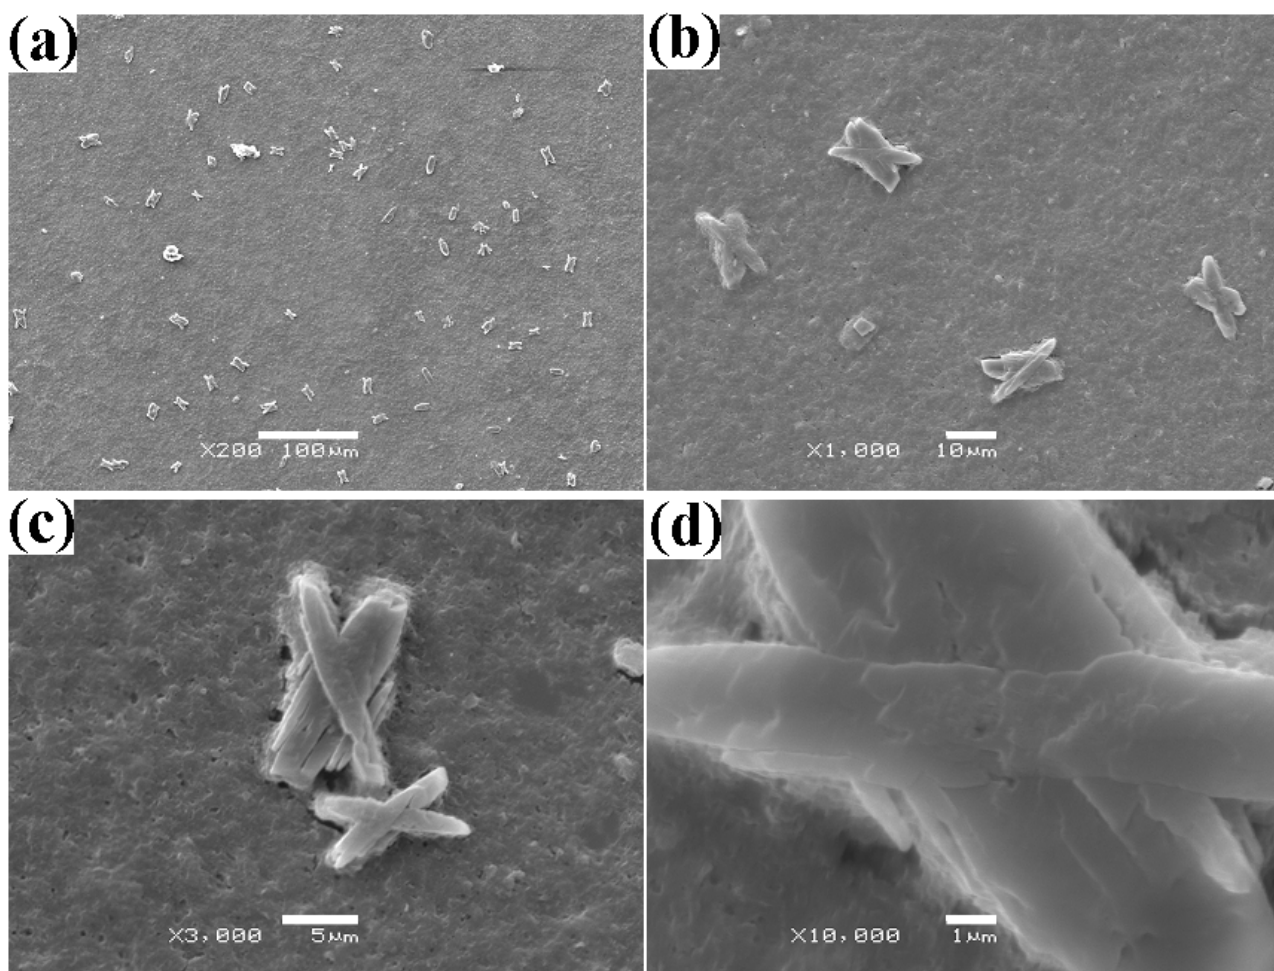

**Fig S1.** SEM images of multilamellar suprastructure of DPPAdT. (a) bar= 100  $\mu\text{m}$ ; (b) bar= 10  $\mu\text{m}$ ; (c) bar= 5  $\mu\text{m}$ ; (d) bar= 1  $\mu\text{m}$ .

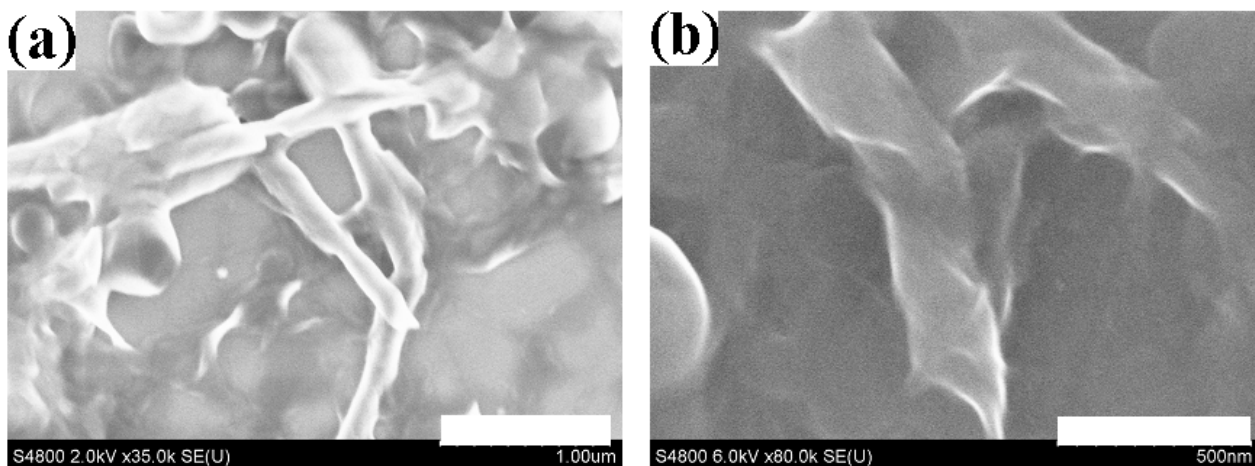

**Fig S2.** SEM images of superhelical strands of DPPAdT. (a) bar= 1  $\mu\text{m}$ ; (b) bar= 500 nm.

DPPAdT (12 mg, 14.2  $\mu\text{mol}$ ) was suspended in water (200  $\mu\text{L}$ ) and sonicated at 70  $^{\circ}\text{C}$  for 10 min to a homogeneous solution, which was then cold to room temperature to give an opaque hydrogel. When heated above 42  $^{\circ}\text{C}$ , this hydrogel turned to fluid liquid crystal. To prepare SEM sample, the hydrogel was freeze-dried, coated onto a mica sheet and then gold shadowed.

### 3.3 Superhelical Strand

DPPAdT (0.84 mg, 1  $\mu\text{mol}$ ) was suspended in water (1 mL) and sonicated at 70  $^{\circ}\text{C}$  for 10 min to a homogeneous solution. After that, the solution was aged at 60  $^{\circ}\text{C}$  for up to 2 days, then cold to room temperature. CD spectra of this solution were recorded (200-350 nm) before and after aging, where the solution was placed in a 1 mm thick quartz cuvette and scanned with 0.5 nm interval. To prepare

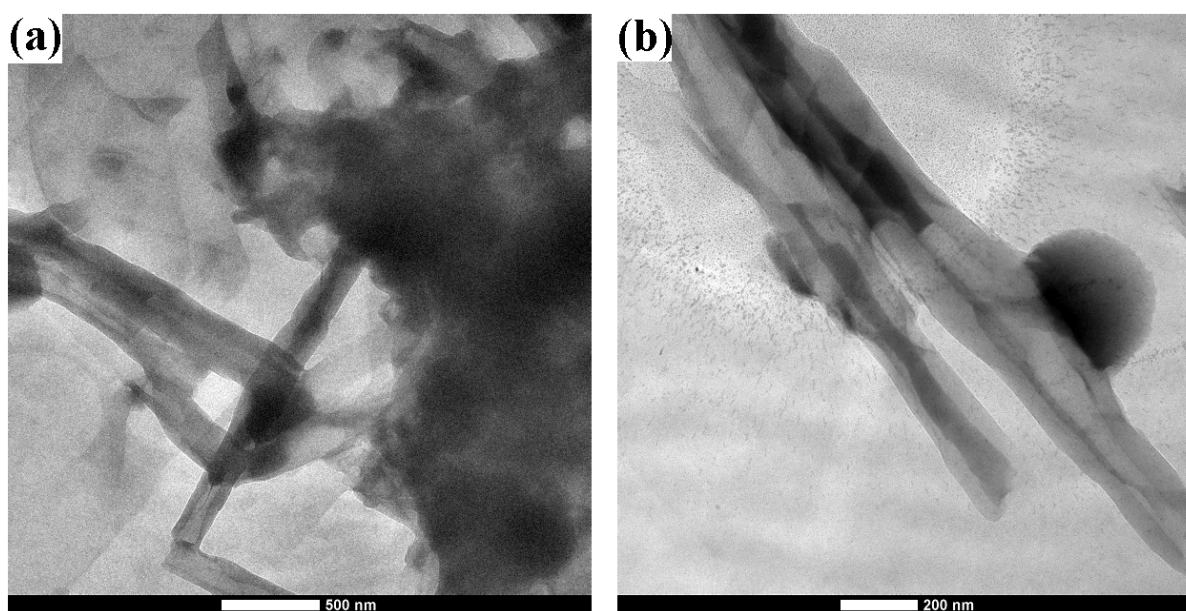

**Fig S3.** TEM images of superhelical strands of DPPAdT. (a) bar= 500 nm; (b) bar= 200 nm.

SEM sample, the solution was diluted to 100  $\mu\text{M}$ , dropped onto a mica sheet, air dried, and then gold shadowed. To prepare TEM sample, a drop of the solution (100  $\mu\text{M}$ ) was allowed to air-dry onto a formvar-carbon coated 230 mesh copper grid, and the sample was stained with ammonium molybdate 1% in water.

### 3.4 Liposome

DOPAdT (0.895 mg) was dissolved in 2 mL of chloroform-methanol (20:1 v/v), evaporated to dryness under reduced pressure, and dried at room temperature for 30 min in vacuo. Water (1 mL) was added followed by sonicated at 50  $^{\circ}\text{C}$  for 1 h, to give liposomes of DOPdTA. To prepare SEM samples, the solution was diluted to 100  $\mu\text{M}$  with PBS buffer (Phosphate buffer saline), dropped onto mica sheets, air dried, and then gold shadowed. To prepare TEM sample, a drop of the solution (100  $\mu\text{M}$ ) was allowed to air-dry onto a formvar-carbon coated 230 mesh copper grid, and the sample was stained with ammonium molybdate 1% in water. Actually, we considered this nanostructure to be liposome because of (1) DOPAdT is electrically neutral itself, but the zeta potential value of these particles is -31.5 mV, implying an ordered nanostructure (liposomes or micelles, not just nanoparticles); (2) The particle size (above 100 nm) is too big for micelles; and (3) TEM image (negative stained with ammonium molybdate) shows a depression in the centre of almost every particle (**Fig. 5b**, **S4c** and **S4d**). In the preparation of SEM samples, the liposome solution was diluted with PBS buffer (Phosphate buffer saline), so the big brick was regarded as the phosphate salt crystallized during the drying process. Besides, the particle size in SEM and TEM image did not match well because (1) SEM samples were coated with gold powder (thicker than 10 nm) to better imaging, which increased the apparent particle size. So we considered it as the major cause for difference in SEM and TEM; and (2) liposomes shrunk inconsistently during the drying process and in the high vacuum chamber of electron microscopes; (3) the liposome solutions for SEM and TEM experiments were not prepared at one time, and the particle size may be fluctuated among these preparations to some extent.

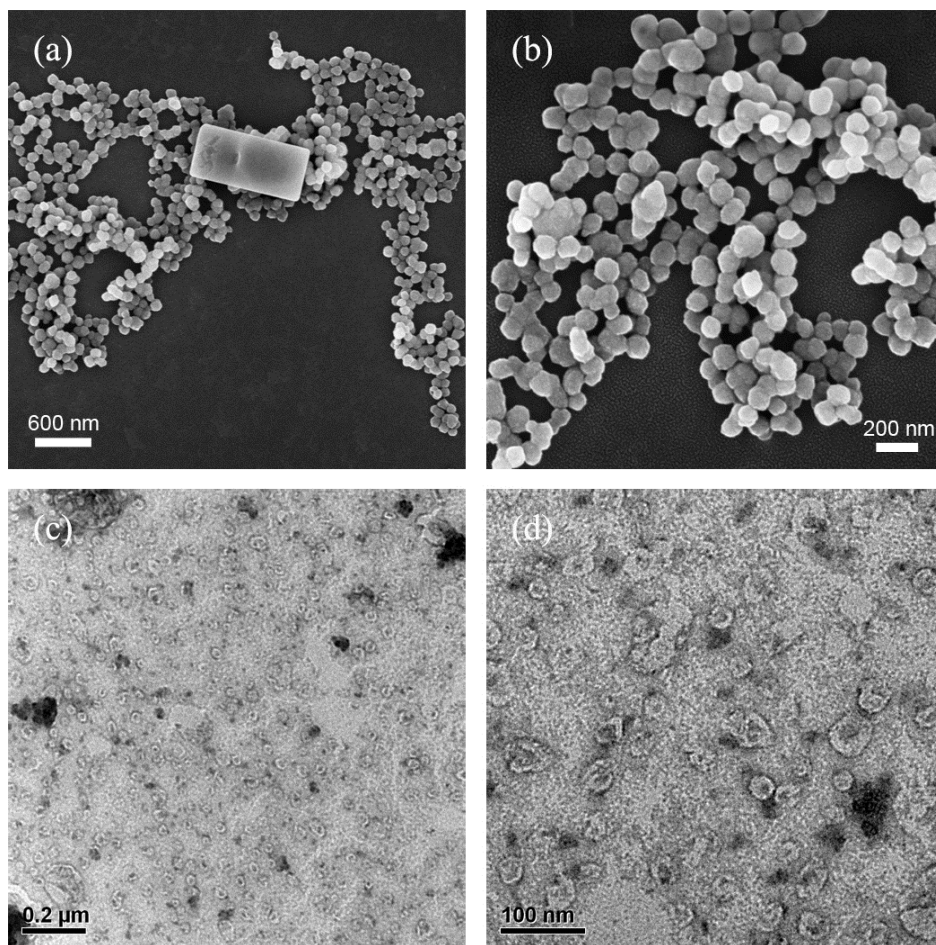

**Fig S4.** (a) SEM image of DOPAdT liposomes (bar = 600 nm); the big brick should be a crystal of phosphate salt (in PBS buffer); (b) SEM image of DOPAdT liposomes (bar = 200 nm); (c) TEM image of DOPAdT liposomes (bar = 200 nm); (d) TEM image of DOPAdT liposomes (bar = 100 nm).



#### 4. Biocompatibility

Cell viability and proliferation were measured with a Cell Counting KIT-8 (CCK-8, Dojindo, www.dojindo.cn). This system consisted of WST-8 (2-[2-methoxy-4-nitrophenyl]-3-[4-nitrophenyl]-5-[2,4-disulfophenyl]-2H-tetrazolium, monosodium salt) that produced a water-soluble formazan dye upon bioreduction in the presence of an electron carrier. WST-8 is reduced by dehydrogenase in cells to give a yellow-colored product (formazan), which is soluble in the tissue culture medium. The amount of the formazan dye generated by the activity of dehydrogenases in cells is directly proportional to the number of living cells. 8000 cells (MCF-7 cells) were seeded on a 96-well plate with DMEM+10% FBS and incubated at 37 °C and humidified 5% CO<sub>2</sub> for 18-24 hours until confluency reached ~70%. Aminonucleoside phospholipids at different concentrations were added, and plate was incubated for another 24 h. Then 10 microliters of thawed CCK-8 solution was added to each well. Plates were incubated for 2 h at the same incubator conditions after which the absorbance was read at 450 nm with a reference wavelength of 600 nm. After deducting the absorbance of aminonucleoside phospholipid itself (plates without cell), cell number was correlated to optical density (OD). Cell viability was calculated as

$$\text{Cell viability} = (\text{OD}_{450(\text{sample})} / \text{OD}_{450(\text{control})}) \times 100\%$$

Where  $\text{OD}_{450(\text{sample})}$  is the absorbance at 450 nm of cells added with aminonucleoside phospholipids, and  $\text{OD}_{450(\text{control})}$  is the absorbance at 450 nm of the negative control.

**Table S1.** Optical density (OD) of the negative controls at 450 nm and 600 nm.

|         | 450 nm O.D. |         | 600 nm O.D. |         |
|---------|-------------|---------|-------------|---------|
|         | cell        | no cell | cell        | no cell |
|         | 1.3117      | 0.6689  | 0.1386      | 0.1617  |
|         | 1.3300      | 0.6504  | 0.1406      | 0.1683  |
|         | 1.3391      | 0.6683  | 0.1378      | 0.1667  |
| average | 1.3269      | 0.6625  | 0.1390      | 0.1656  |
| SD      | 0.0140      | 0.0105  | 0.0014      | 0.0034  |

**Table S2.** Cell viability test for 24 h of DOPAdT and DPPAdT at different concentrations.

|                | DOPAdT ( $\mu\text{M}$ ) |        |        | DPPAdT ( $\mu\text{M}$ ) |        |        | Negative Control |
|----------------|--------------------------|--------|--------|--------------------------|--------|--------|------------------|
|                | 100                      | 20     | 4      | 100                      | 20     | 4      |                  |
| Cell/no cell   | 0.6293                   | 0.7163 | 0.7189 | 0.6405                   | 0.7416 | 0.7838 | 0.6910           |
| SD             | 0.0329                   | 0.0195 | 0.0413 | 0.0260                   | 0.0161 | 0.0247 | 0.0142           |
| Cell viability | 91.1%                    | 104%   | 104%   | 92.7%                    | 107%   | 113%   | 100.0%           |
| SD/blank       | 2.77%                    | 1.64%  | 3.48%  | 2.19%                    | 1.36%  | 2.08%  | 1.19%            |

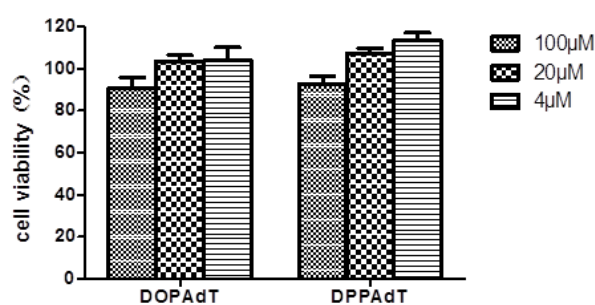

**Figure S5.** Cell viability test for 24 h of DOPAdT and DPPAdT in MCF-7 cells.

## 5. Cellular Uptake

The cellular uptake of MCF-7 breast cancer cells was measured by high content screening. MCF-7 cells were seeded in a 96-well plate at a density of 15000 cells/well in 100  $\mu\text{L}$  of growth medium and cultured under the condition of 5%  $\text{CO}_2$  at 37  $^\circ\text{C}$ . After 24 h, the cells were treated with free coumarin, coumarin-phosphatidylcholine (EPC) liposomes, coumarin-DOPAdT liposomes for 4 h. The final concentration of coumarin was 10  $\mu\text{M}$ . Control experiments were performed by adding blank medium. After the incubation, the cells were washed with PBS. And then the cells were fixed with 100  $\mu\text{L}$  of 4% paraformaldehyde at room temperature, respectively. The cellular uptake was measured by high content screening and indicated by fluorescent intensity. Each assay was repeated in quintuplicate. The average fluorescence intensities of MCF-7 breast cancer cells after applying free coumarin, coumarin-phosphatidylcholine (EPC) liposomes, coumarin-DOPAdT liposomes and blank medium were  $224 \pm 51.1$ ,  $246 \pm 57.1$ ,  $317.28 \pm 53.0$  and  $5.23 \pm 3.15$ , respectively.

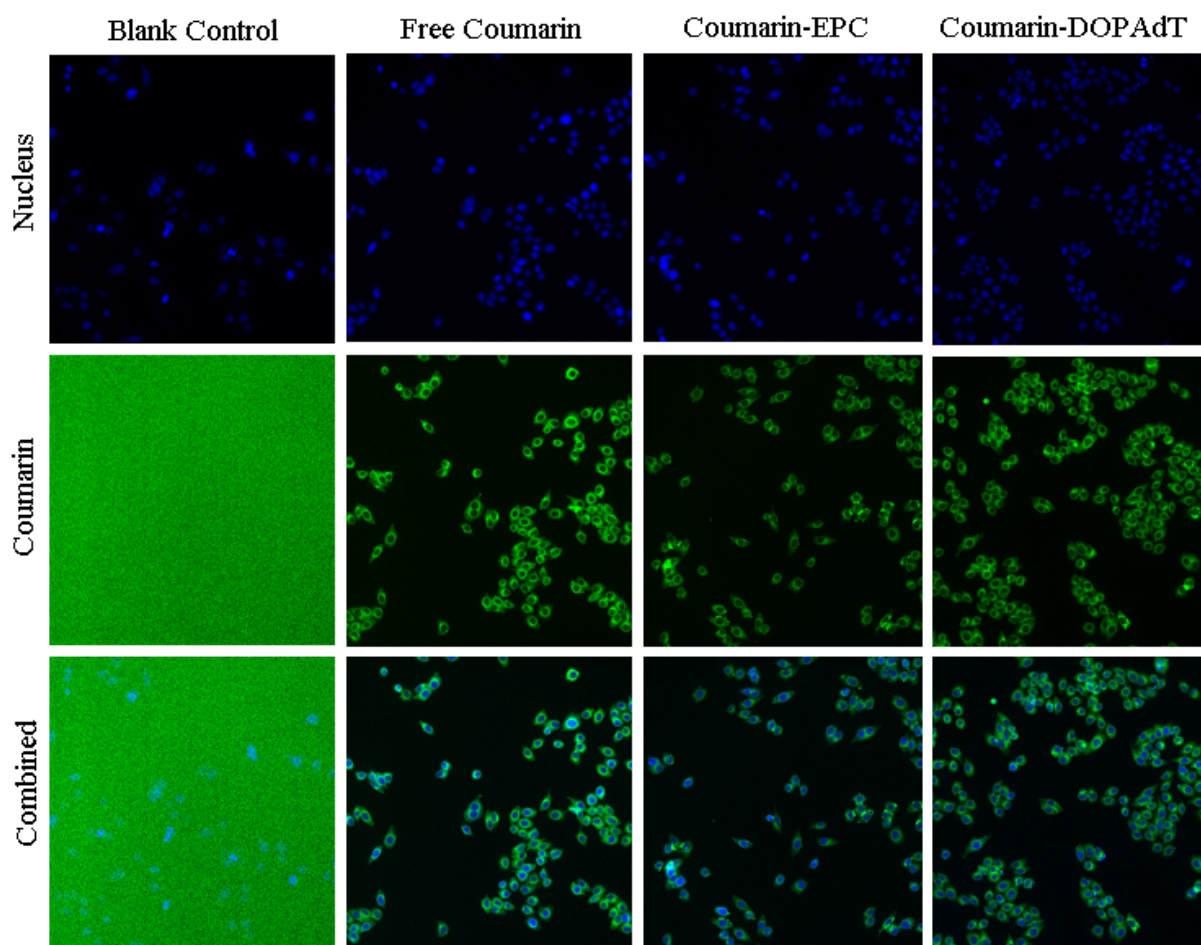

**Fig S6.** The fluorescence images of MCF-7 breast cancer cells after applying free coumarin, coumarin-phosphatidylcholine (EPC) liposomes, coumarin-DOPAdT liposomes and blank medium

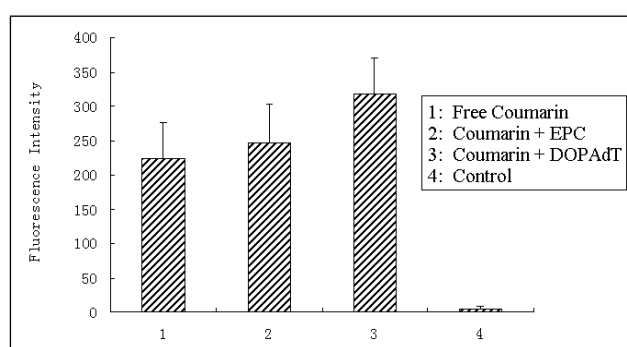

**Fig S7.** Uptake of coumarin by MCF-7 cells.

## 6. Study on the Interaction of Aminonucleoside Phospholipids and Nucleic Acids

### 6.1 CD Spectroscopy

A solution of polyA (20 bps, 50  $\mu$ M) and a mixture solution of DPPAdT (1 mM) and polyA (20 bps, 50  $\mu$ M) were prepared at first. CD spectra of these two solutions were recorded (200-350 nm) immediately after preparation, where the solution was placed in a 1 mm thick quartz cuvette and

scanned with 0.5 nm interval. After that, these two solutions were heated to 90 °C, and then cooled to 4 °C slowly during a time of 4 h (annealing). CD spectra were recorded (200-350 nm) again after annealing.

## 6.2 Atomic Force Microscopy (AFM) Image

A solution of calf thymus DNA (2 ng/μL) and a mixture solution of DPPAdT (84 ng/μL) and calf thymus DNA (2 ng/μL) were prepared at first. AFM samples were prepared by dropping these two solutions onto micas respectively and air-dried.

## 6.3 Molecular Dynamics (MD) Simulation

MD simulation was performed with AMBER 11 molecular simulation package.<sup>[9]</sup> The AMBER99 force field was used to describe the DOPAd-polyA complex. To obtain molecular mechanical parameters for the DOPAdTA, ab initio quantum chemical methods were employed using the Gaussian 09 program.<sup>[10]</sup> The geometry was fully optimized and then the electrostatic potentials around them were determined at the HF/6-31G\* level of theory. The RESP strategy<sup>[11]</sup> was used to obtain the partial atomic charges.

Starting model of DOPAdT-polyA complex was built using Discovery Studio 2.5 software. The model was solvated in TIP3P water using a octahedral box, of which extended 8 Å away from any solute atom. To neutralize the negative charges of simulated molecules, Na<sup>+</sup> counterion was placed next to each phosphate group.

Molecular dynamics (MD) simulation was carried out by using the SANDER module of AMBER 11. The calculations began with 500 steps of steepest descent followed by 500 steps of conjugate gradient minimization with a large constraint of 500 kcal mol<sup>-1</sup> Å<sup>-2</sup> on the DOPAdT-polyA complex. Then 1000 steps of steepest descent followed by 1500 steps of conjugate gradient minimization with no restraints on the DOPAdT-polyA complex were performed. Subsequently, after 20 ps of MD, during which the temperature was slowly raised from 0 to 300 K with weak (10 kcal mol<sup>-1</sup> Å<sup>-2</sup>) restraints on the DOPAdT-polyA complex, the final unrestrained production simulations of 3.0 ns for the molecule was carried out at constant pressure (1 atm) and temperature (300 K). In the entire simulation, SHAKE was applied to all hydrogen atoms. Periodic boundary conditions with minimum image conventions were applied to calculate the nonbonded interactions. A cutoff of 10 Å was used for the Lennard-Jones interactions. The final structure of DOPAdT-polyA complex was produced

from the 1,000 steps of minimized averaged structure of the last 2.0 ns of MD.

The final structure of DOPAdT-polyA complex was shown in Fig S8. The oligomeric deoxyadenosine (polyA) presents helical form in this condition, to which DOPAdT molecules bind stably based on Watson-Crick base-pairing interaction(Fig S8a and S8b). Take the 10th deoxyadenosine (form the 5' end) and the corresponding DOPAdT molecule binding to it for an example, N--H and O--H hydrogen bonds were 1.910 Å and 1.926 Å respectively (Fig S8c). As to the 20th deoxyadenosine and the corresponding DOPAdT molecule, the length of N--H and O--H hydrogen bonds were 1.943 Å and 2.065 Å, respectively (Fig S8d).

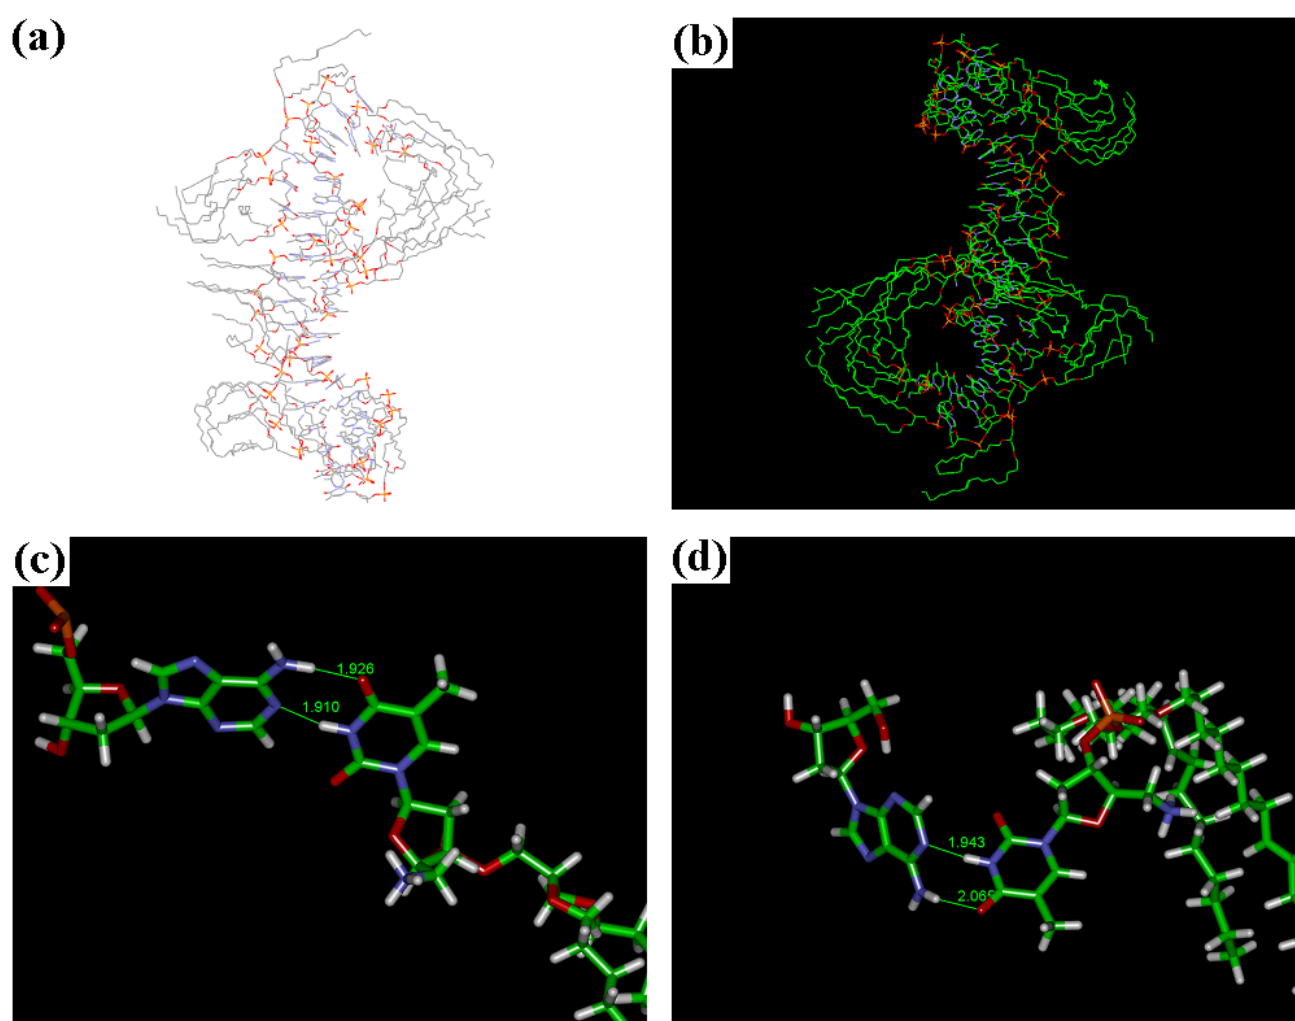

**Figure S8.** (a) & (b) Images of molecular dynamics simulation result of DOPAdT-polyA complex; (c) Simulation structure of the 10th deoxyadenosine (from the 5' end) and the corresponding DOPAdT molecule binding to it; (d) Simulation structure of the 10th deoxyadenosine (from the 5' end) and the corresponding DOPAdT molecule binding to it.

## References

- [1] K. Gogoi, A. D. Gunjal, U. D. Phalgune, V. A. Kumar, *Org. Lett.* **2007**, *9*, 2696-2700.
- [2] I. van Daele, H. Munier-Lehmann, M. Froeyen, J. Balzarini, S. van Calenbergh, *J. Med. Chem.* **2007**, *50*, 5281-5292.
- [3] A. Krief, A. Froidbise, *Tetrahedron* **2004**, *60*, 7637-7658.
- [4] H. Zheng, X. Du, *J. Phys. Chem. B* **2009**, *113*, 11330-11337.
- [5] A. Bajaj, B. Paul, P. Kondaiah, S. Bhattacharya, *Bioconjugate Chem.* **2008**, *19*, 1283-1300.
- [6] D. W. Pack, G. Chen, K. M. Maloney, C.-T. Chen, F. H. Arnold, *J. Am. Chem. Soc.* **1997**, *119*, 2479-2487.
- [7] M. Ishiyama, H. Tominaga, M. Shiga, K. Sasamoto, Y. Ohkura, K. Ueno, *Biol. Pharm. Bull* **1996**, *19*, 1518-1520.
- [8] X.-X. Wang, Y.-B. Li, H.-J. Yao, R.-J. Ju, Y. Zhang, R.-J. Li, Y. Yu, L. Zhang, W.-L. Lu, *Biomaterials* **2011**, *32*, 5673.
- [9] D.A. Case, T. A. Darden, T. E. Cheatham, C. L. Simmerling, J. Wang, R. E. Duke, R. Luo, R. C. Walker, W. Zhang, K. M. Merz, B. Roberts, B. Wang, S. Hayik, A. Roitberg, G. Seabra, I. Kolossváry, K. F. Wong, F. Paesani, J. Vanicek, J. Liu, X. Wu, S. R. Brozell, T. Steinbrecher, H. Gohlke, Q. Cai, X. Ye, J. Wang, M.-J. Hsieh, G. Cui, D. R. Roe, D. H. Mathews, M. G. Seetin, C. Sagui, V. Babin, T. Luchko, S. Gusarov, A. Kovalenko, P. A. Kollman, 2010, AMBER 11, University of California, San Francisco.
- [10] Gaussian 09, Revision A.1, M. J. Frisch, G. W. Trucks, H. B. Schlegel, G. E. Scuseria, M. A. Robb, J. R. Cheeseman, G. Scalmani, V. Barone, B. Mennucci, G. A. Petersson, H. Nakatsuji, M. Caricato, X. Li, H. P. Hratchian, A. F. Izmaylov, J. Bloino, G. Zheng, J. L. Sonnenberg, M. Hada, M. Ehara, K. Toyota, R. Fukuda, J. Hasegawa, M. Ishida, T. Nakajima, Y. Honda, O. Kitao, H. Nakai, T. Vreven, J. A. Montgomery, Jr., J. E. Peralta, F. Ogliaro, M. Bearpark, J. J. Heyd, E. Brothers, K. N. Kudin, V. N. Staroverov, R. Kobayashi, J. Normand, K. Raghavachari, A. Rendell, J. C. Burant, S. S. Iyengar, J. Tomasi, M. Cossi, N. Rega, J. M. Millam, M. Klene, J. E. Knox, J. B. Cross, V. Bakken, C. Adamo, J. Jaramillo, R. Gomperts, R. E. Stratmann, O. Yazyev, A. J. Austin, R. Cammi, C. Pomelli, J. W. Ochterski, R. L. Martin, K. Morokuma, V. G. Zakrzewski, G. A. Voth, P. Salvador, J. J. Dannenberg, S. Dapprich, A. D. Daniels, O. Farkas, J. B. Foresman, J. V. Ortiz, J. Cioslowski, D. J. Fox, Gaussian, Inc., Wallingford CT, **2009**.
- [11] C. I. Bayly, P. Cieplak, W. D. Cornell, P. A. Kollman, *J. Phys. Chem.* **1993**, *97*, 10269-10280.

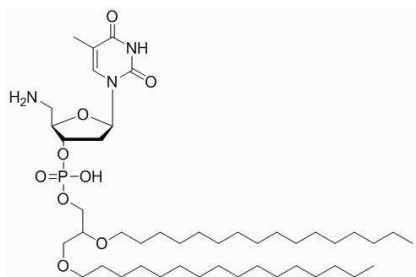

**1a**

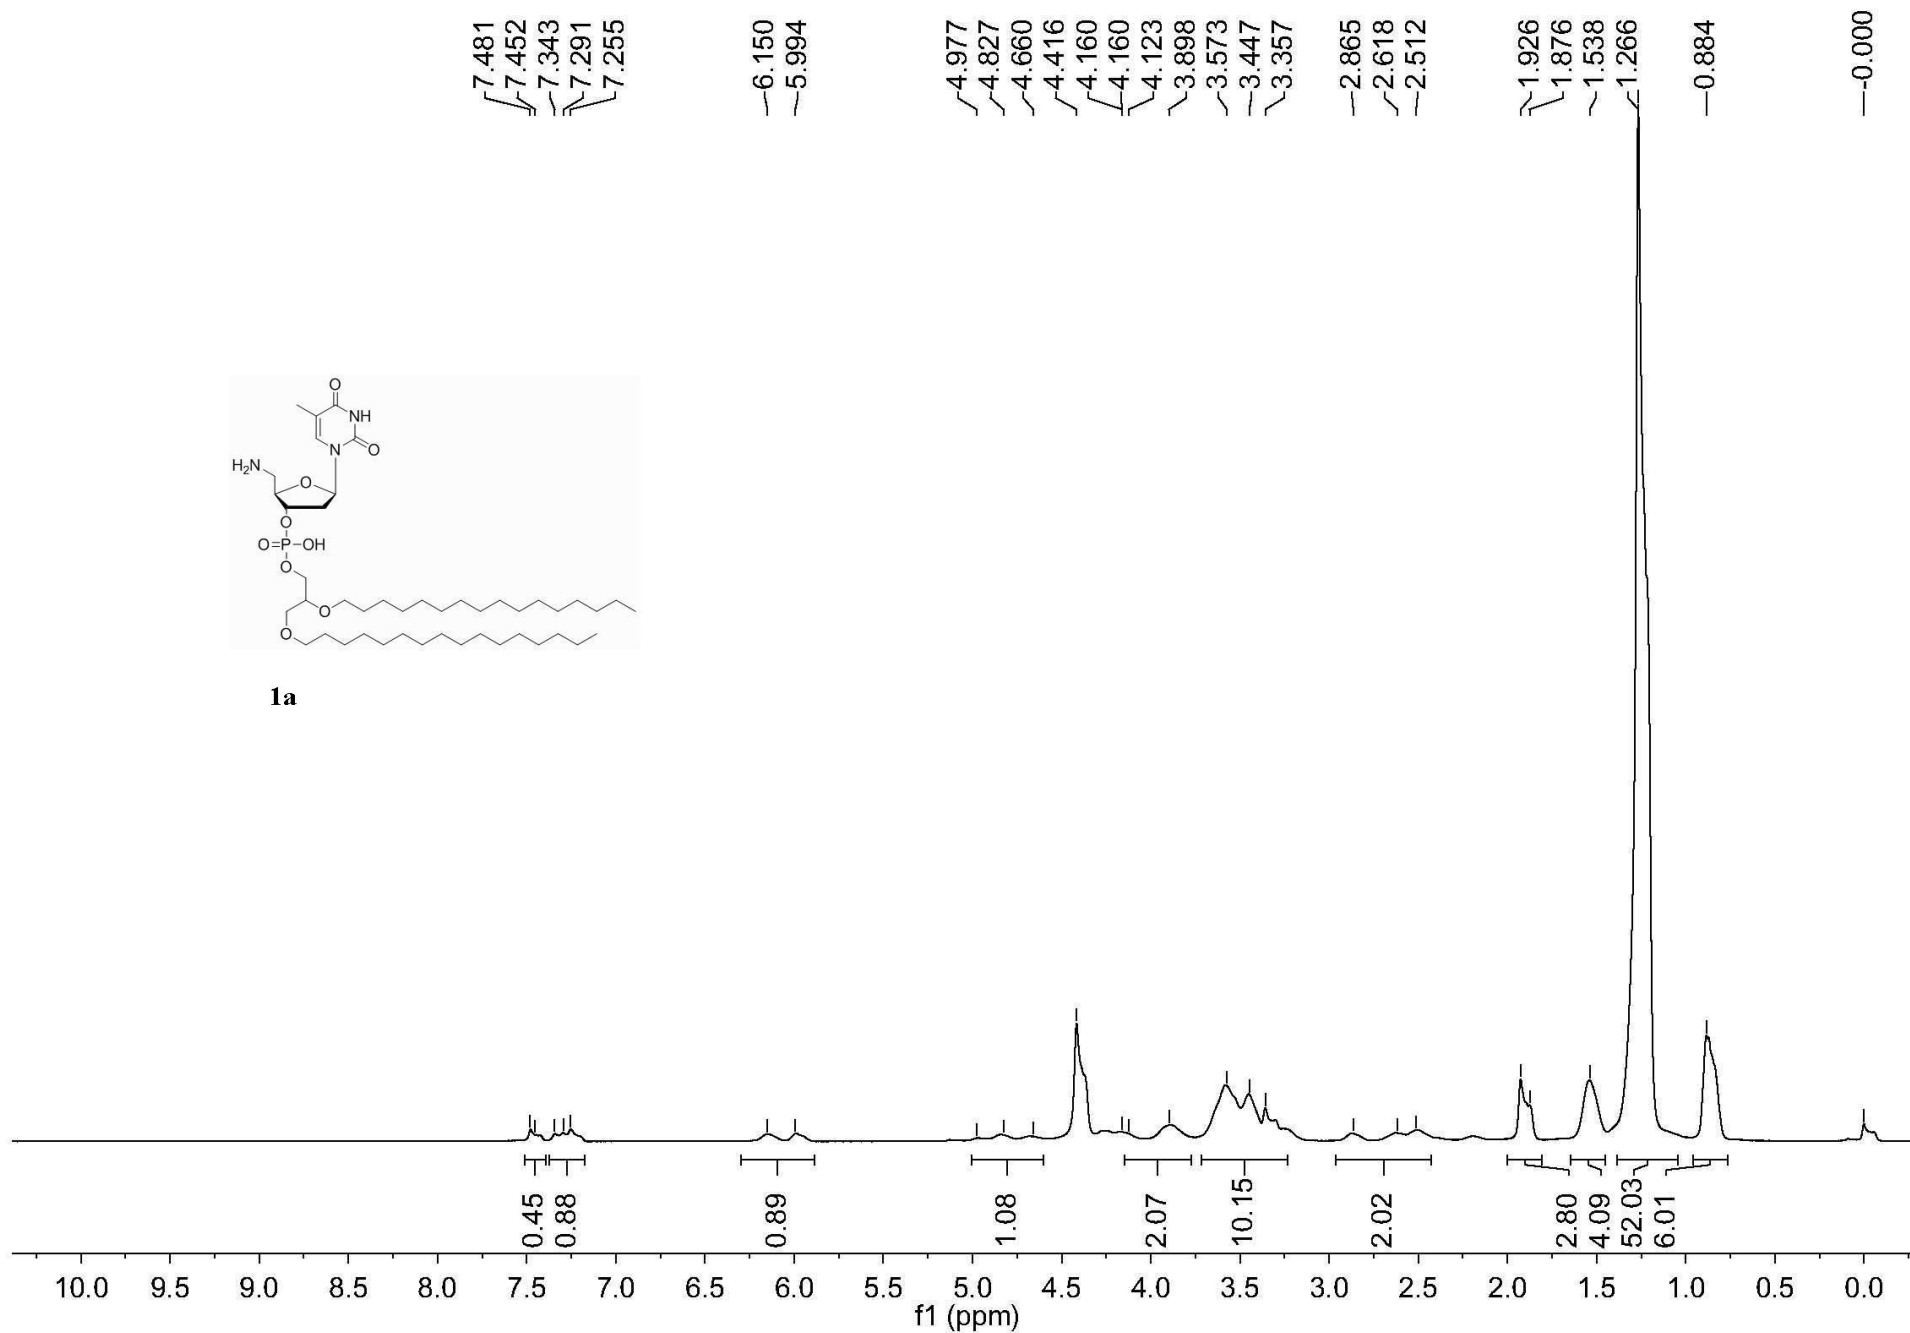

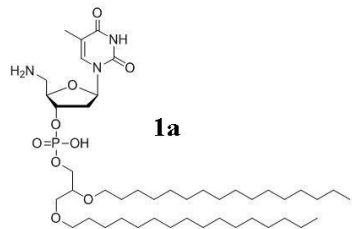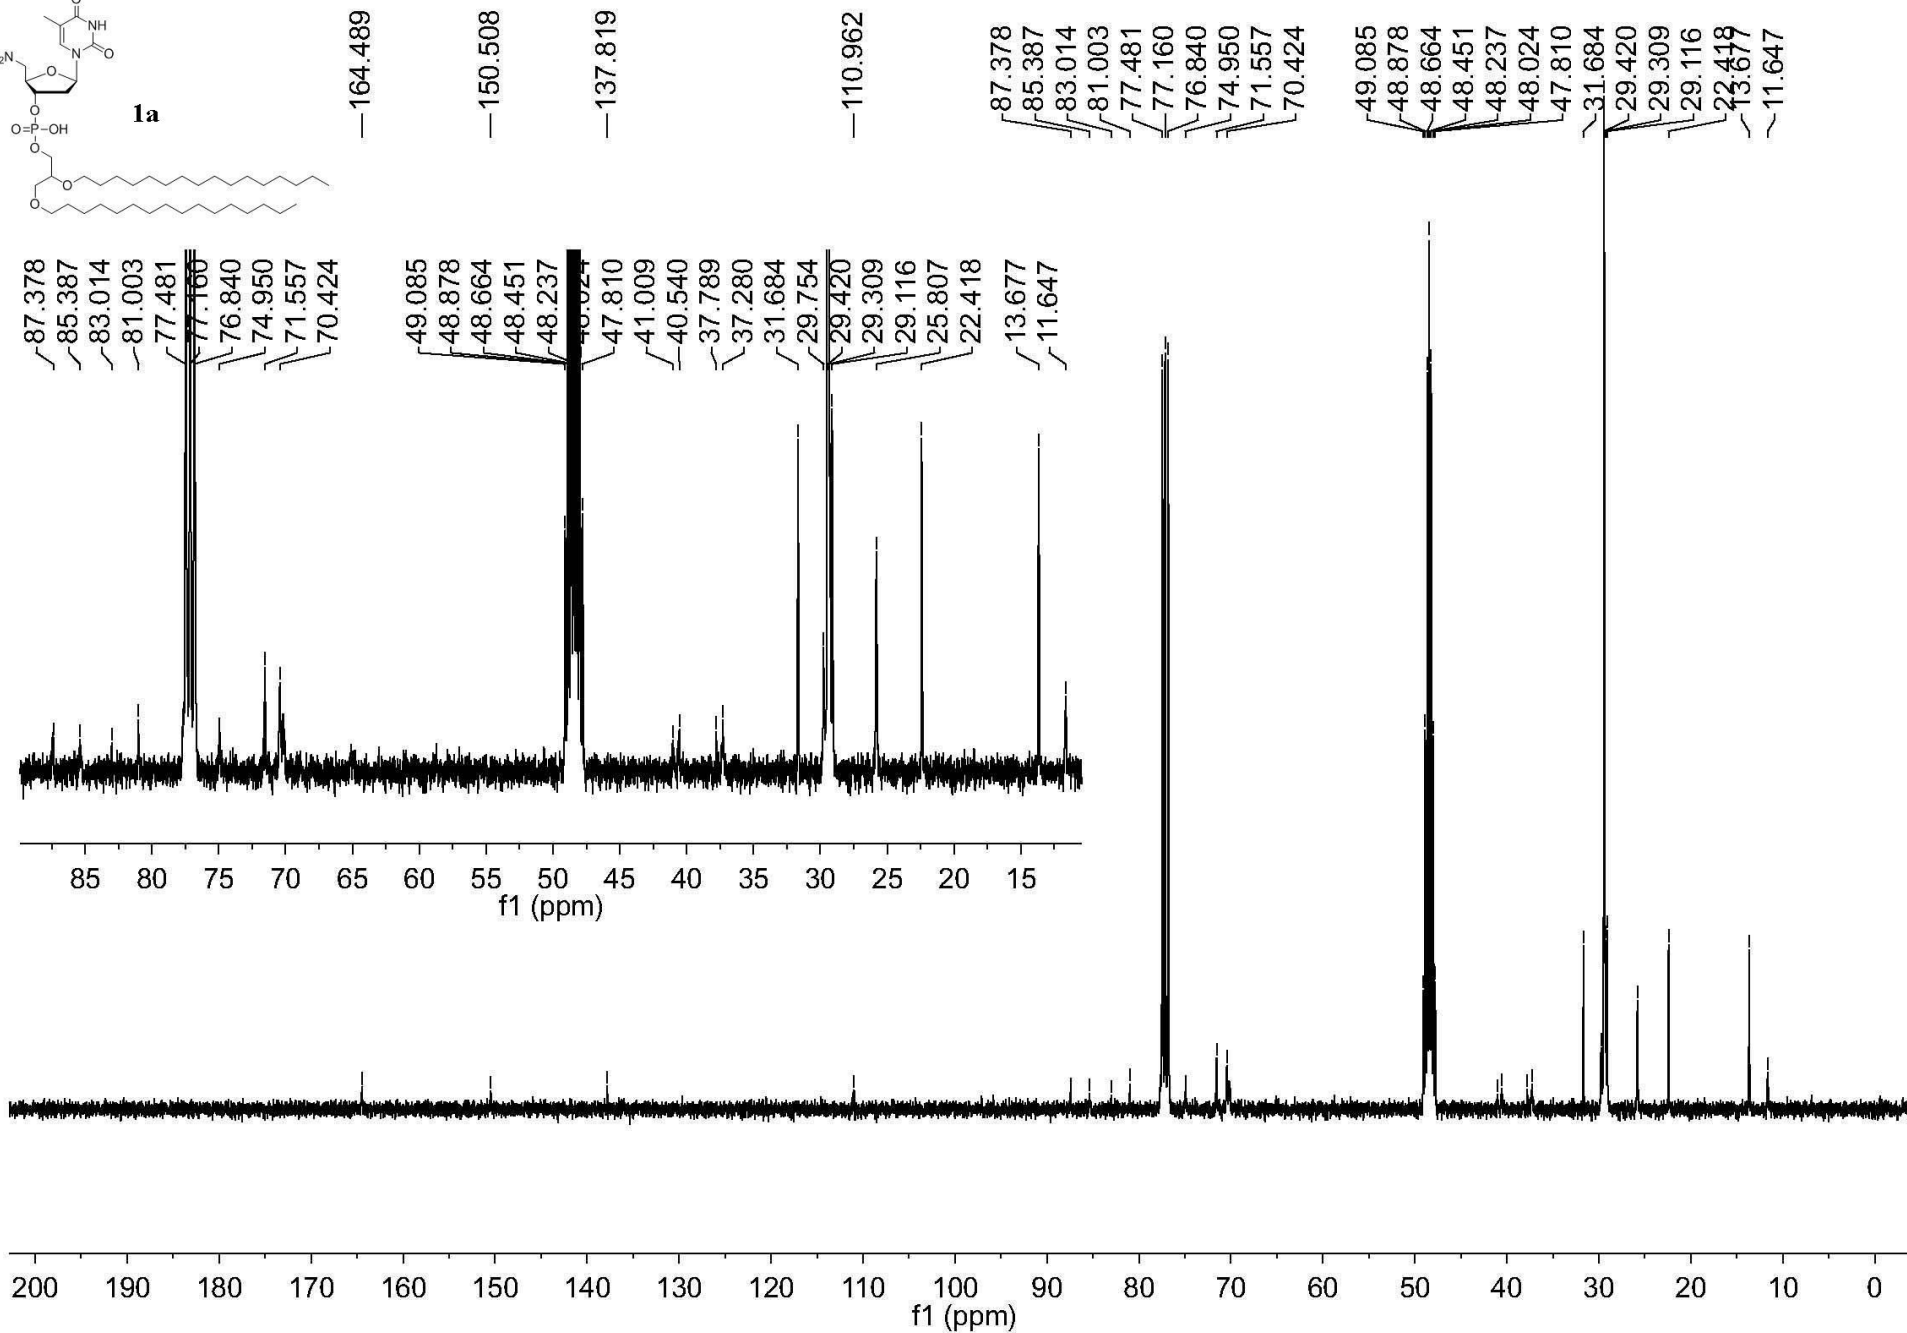



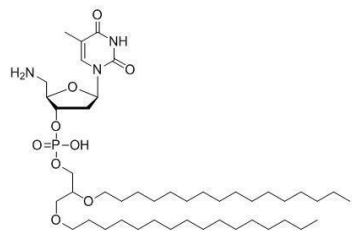

**1a**

-1.227

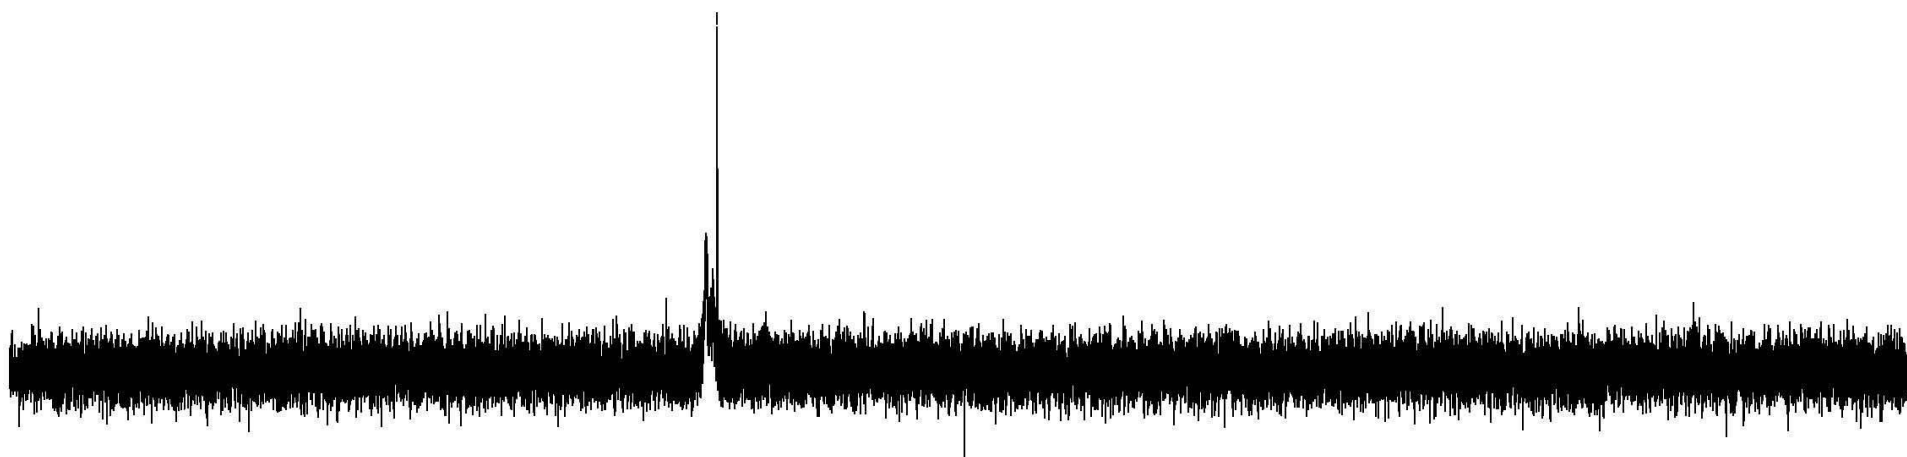

140 110 80 60 40 20 0 -30 -60 -90 -130 -170 -210  
f1 (ppm)

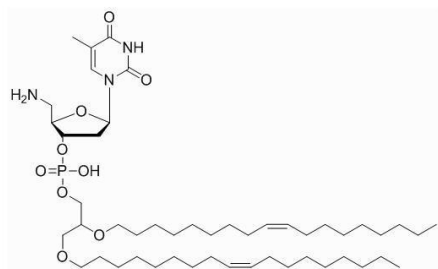

**1b**

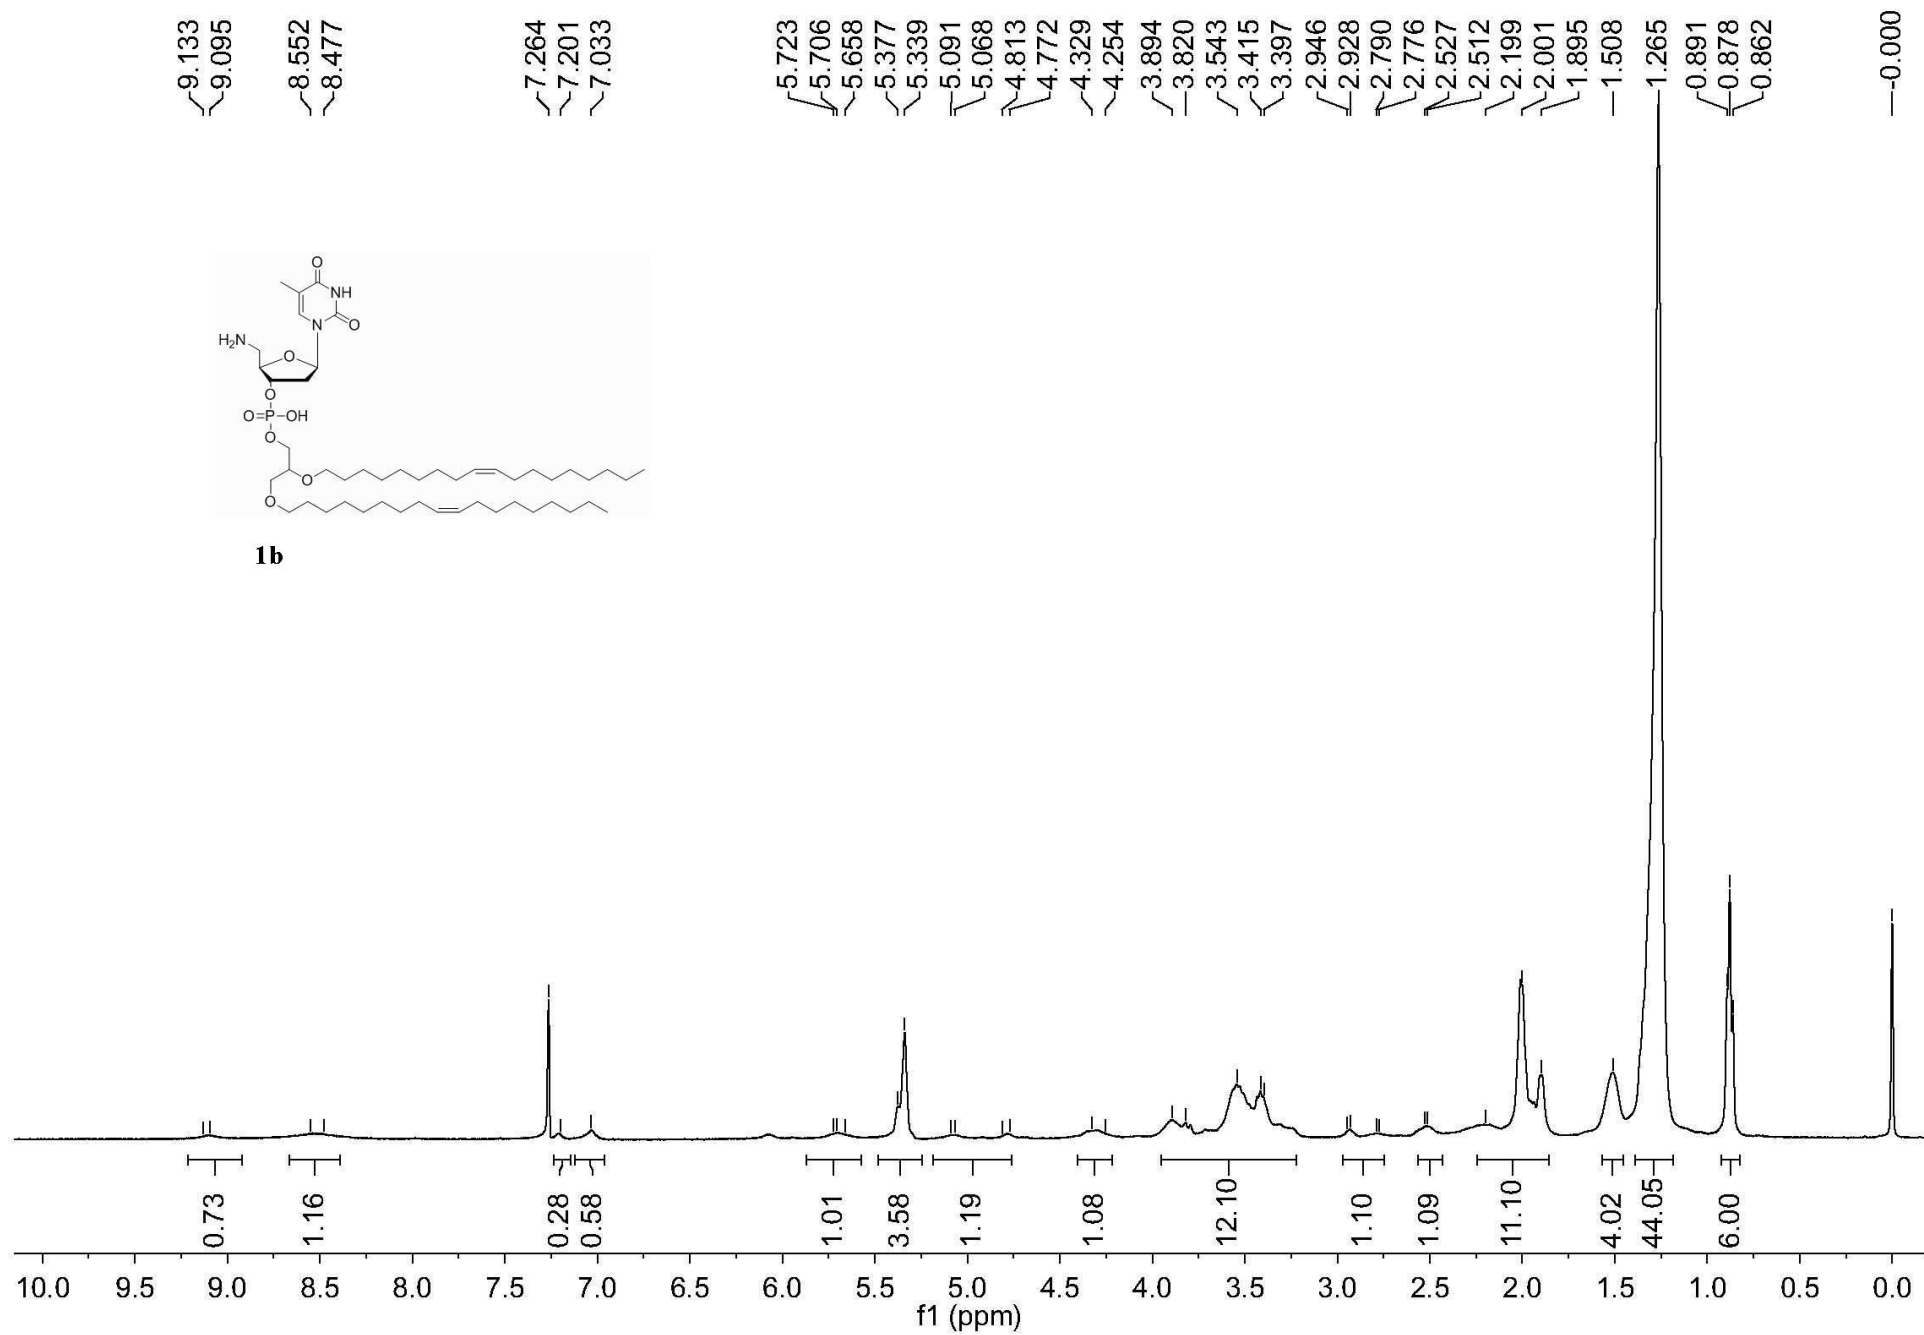

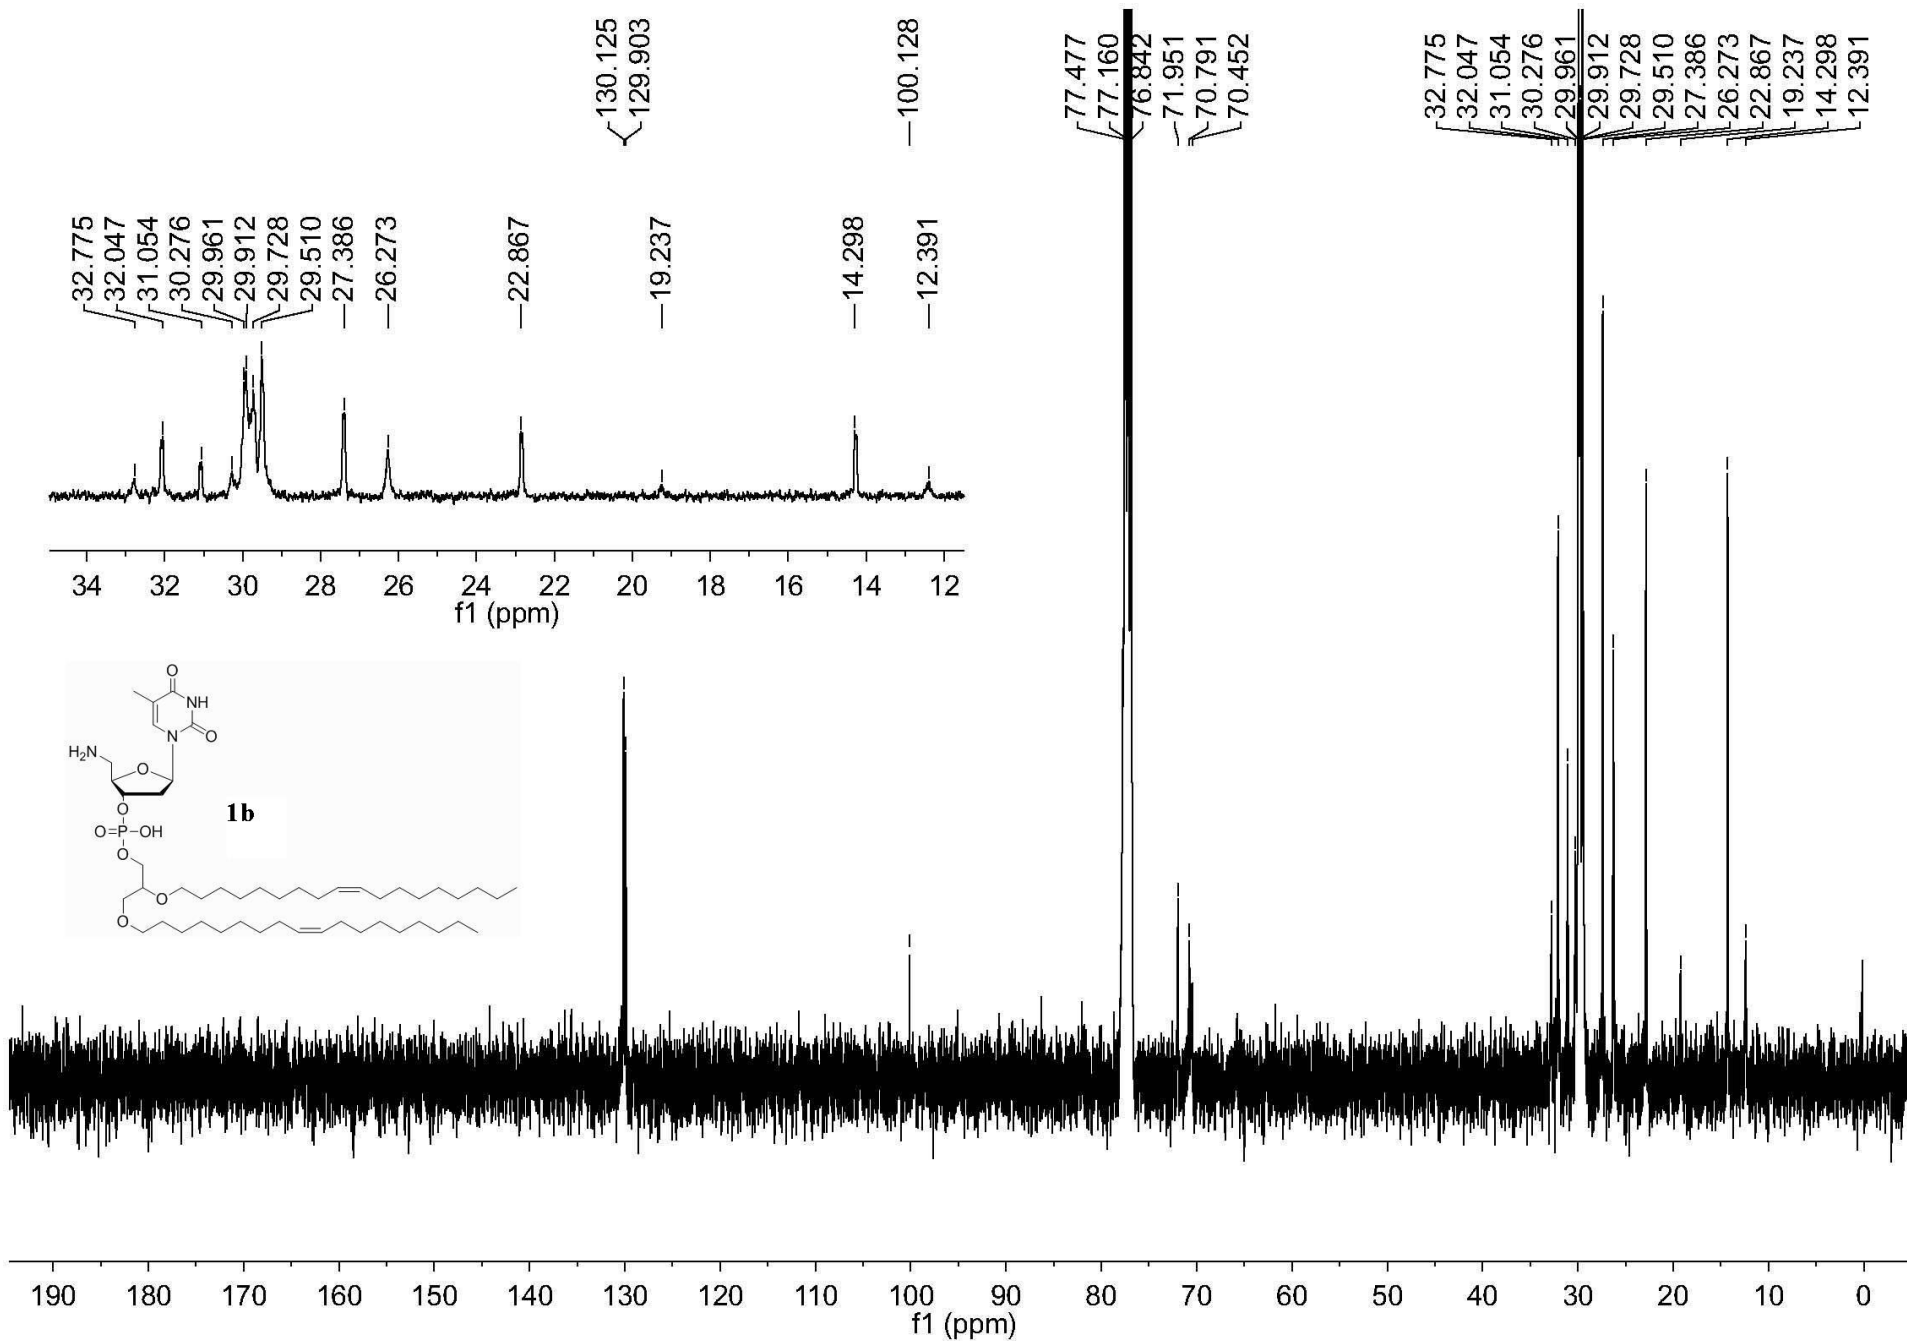

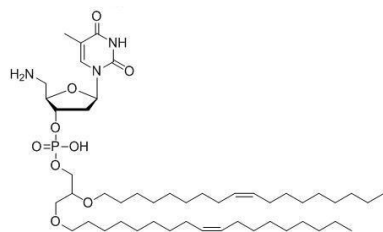

**1b**

—0.494

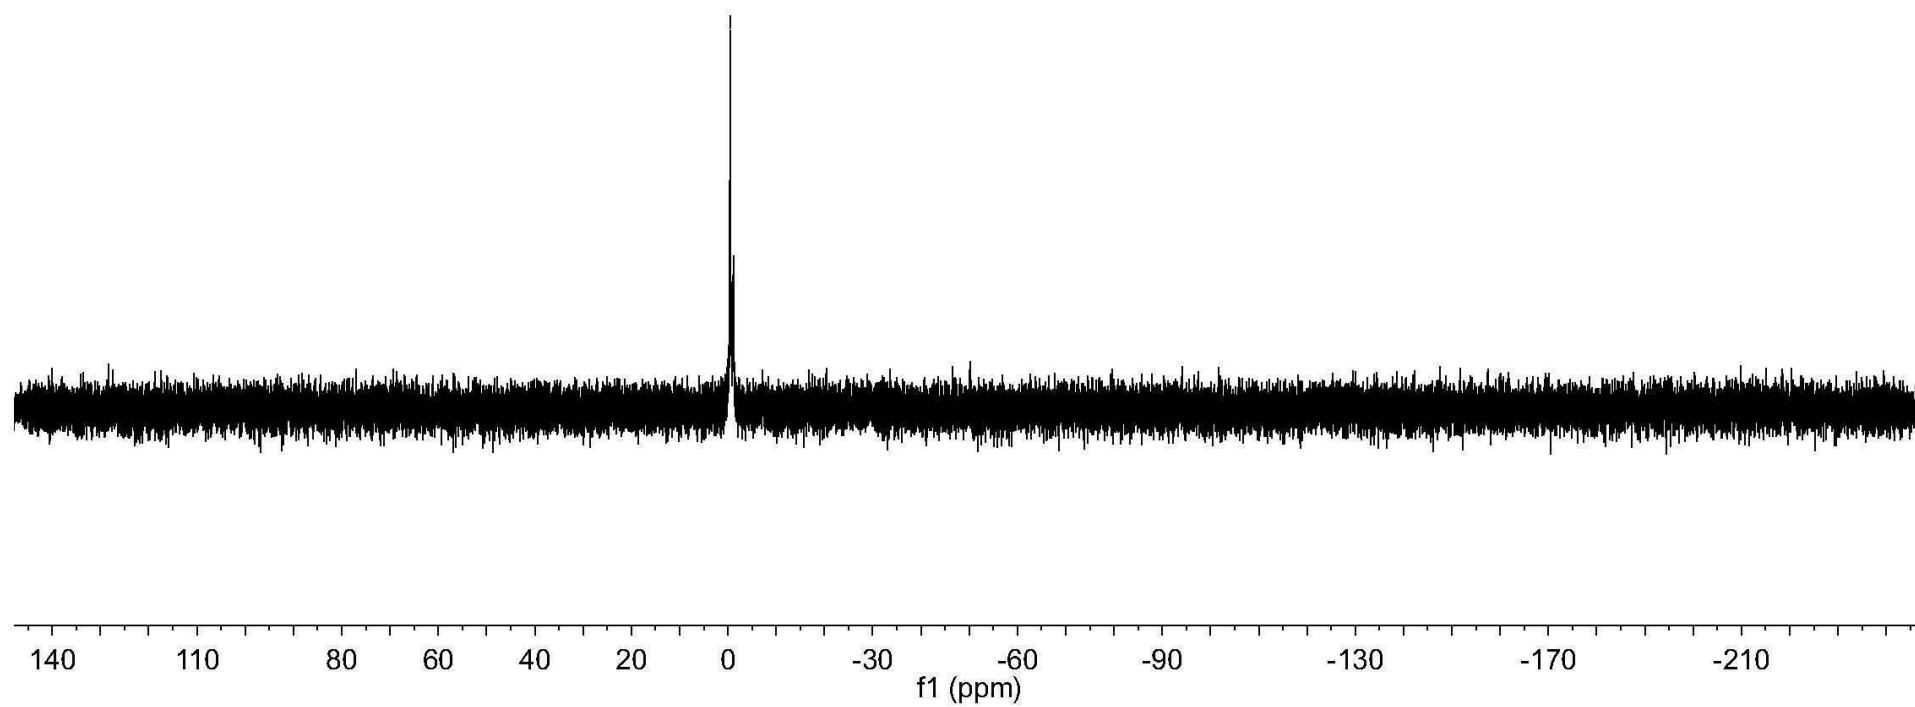

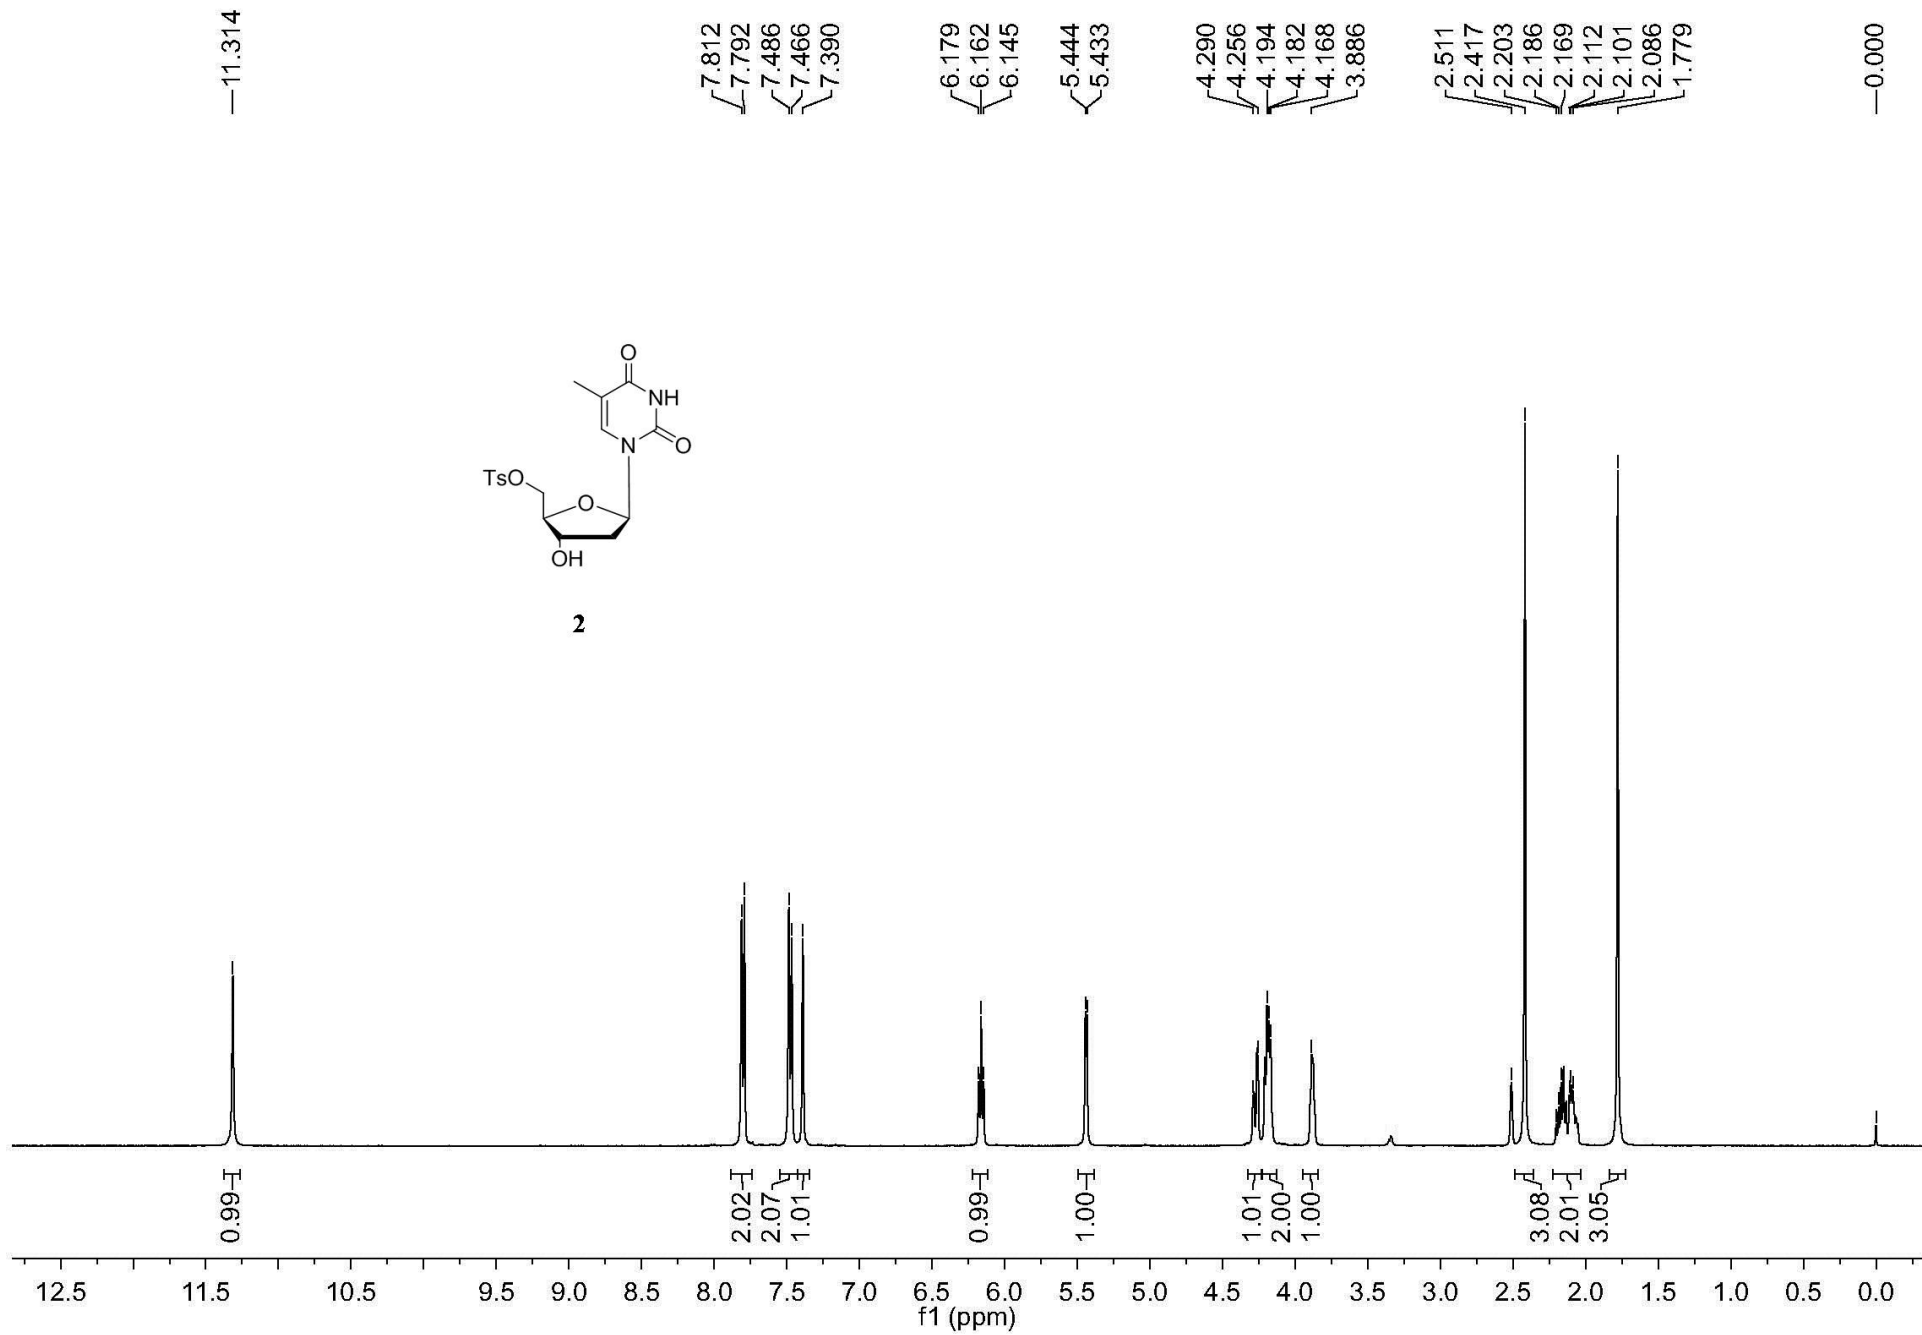

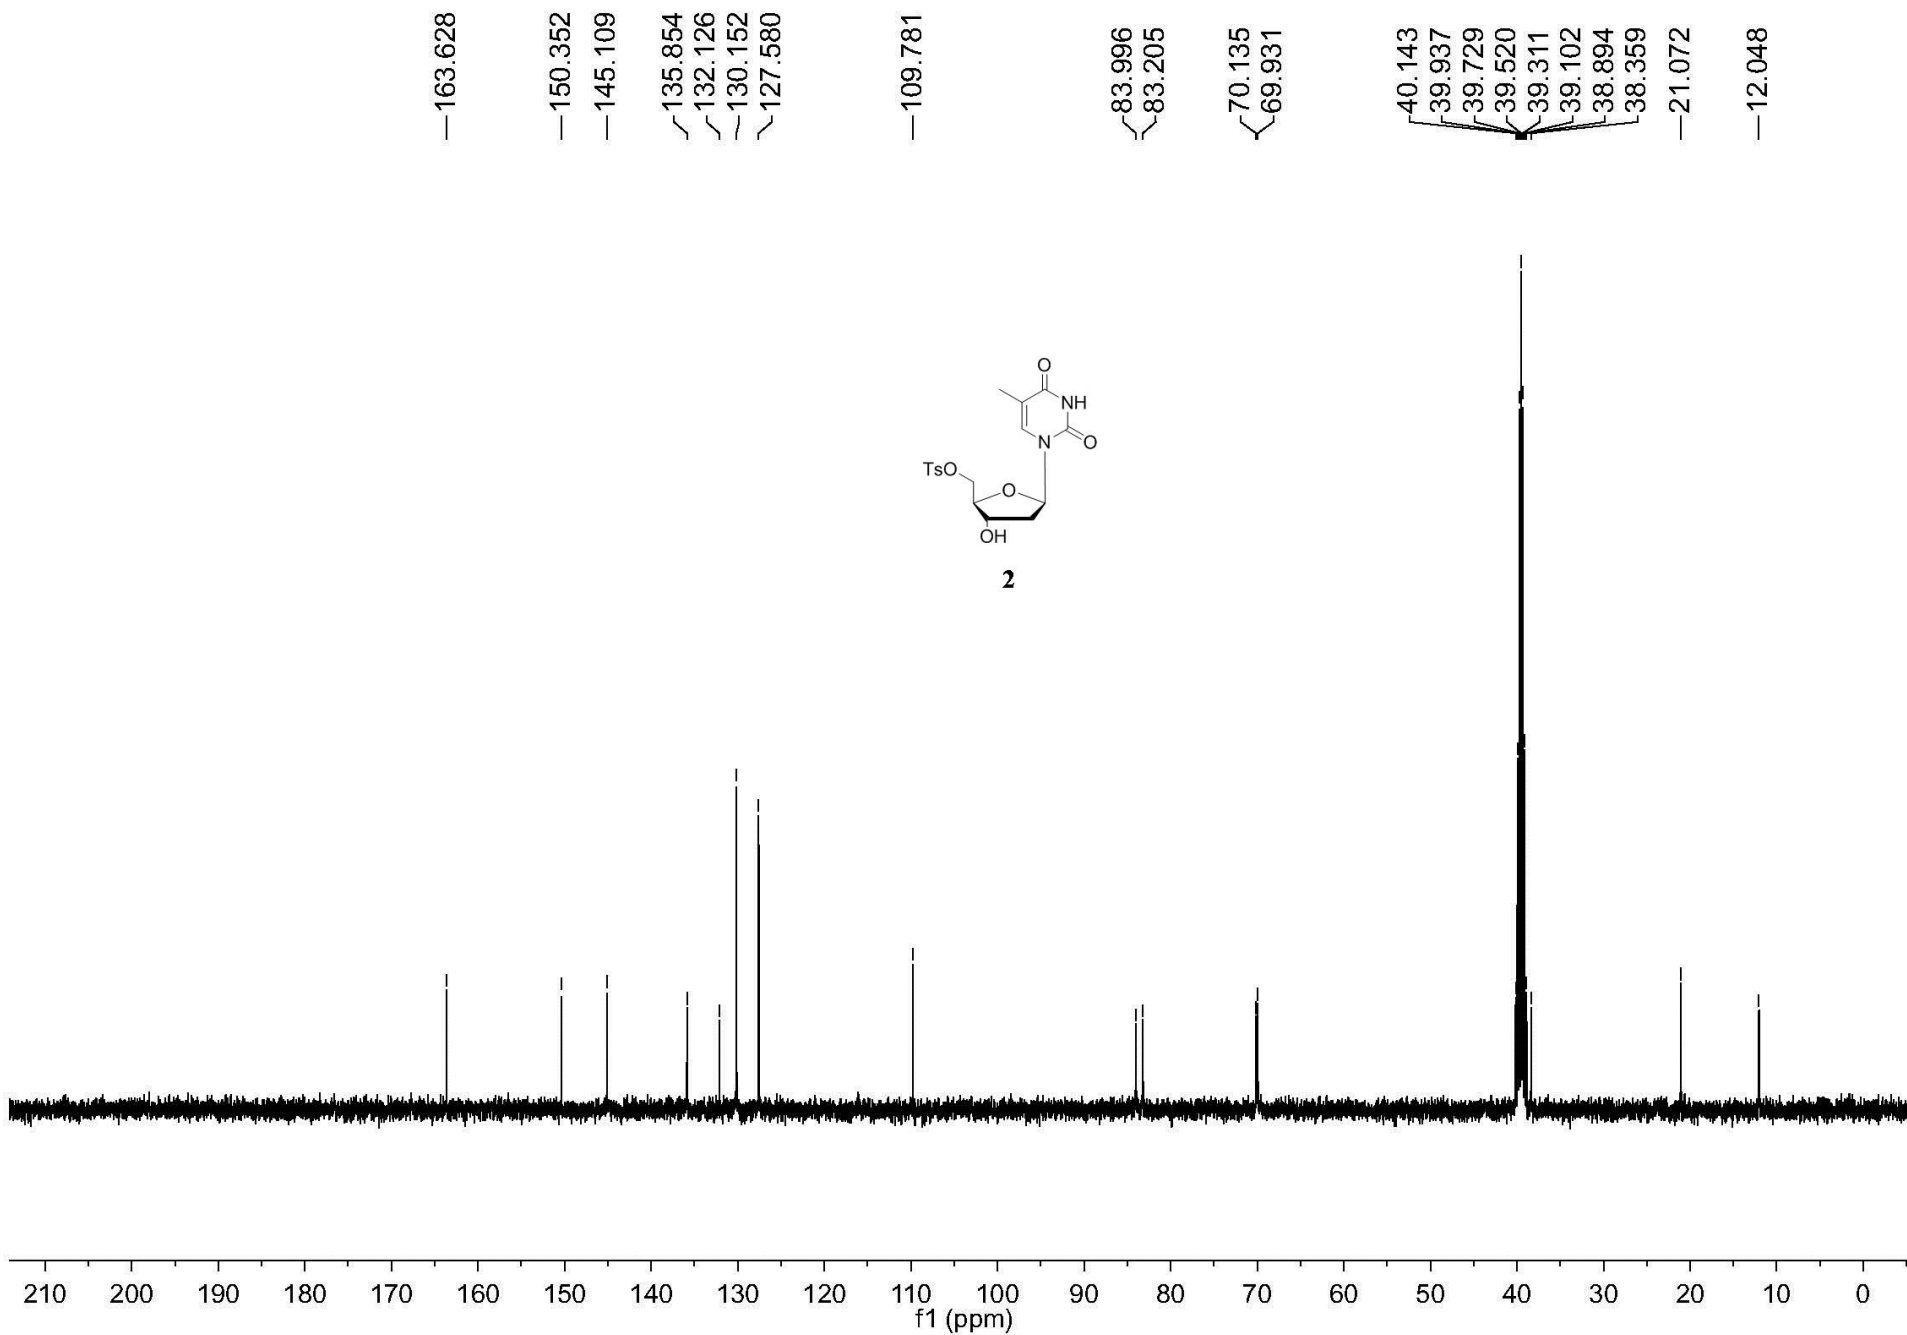

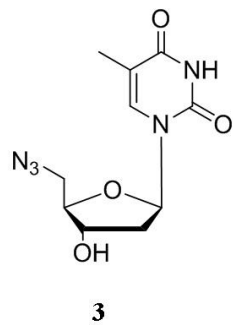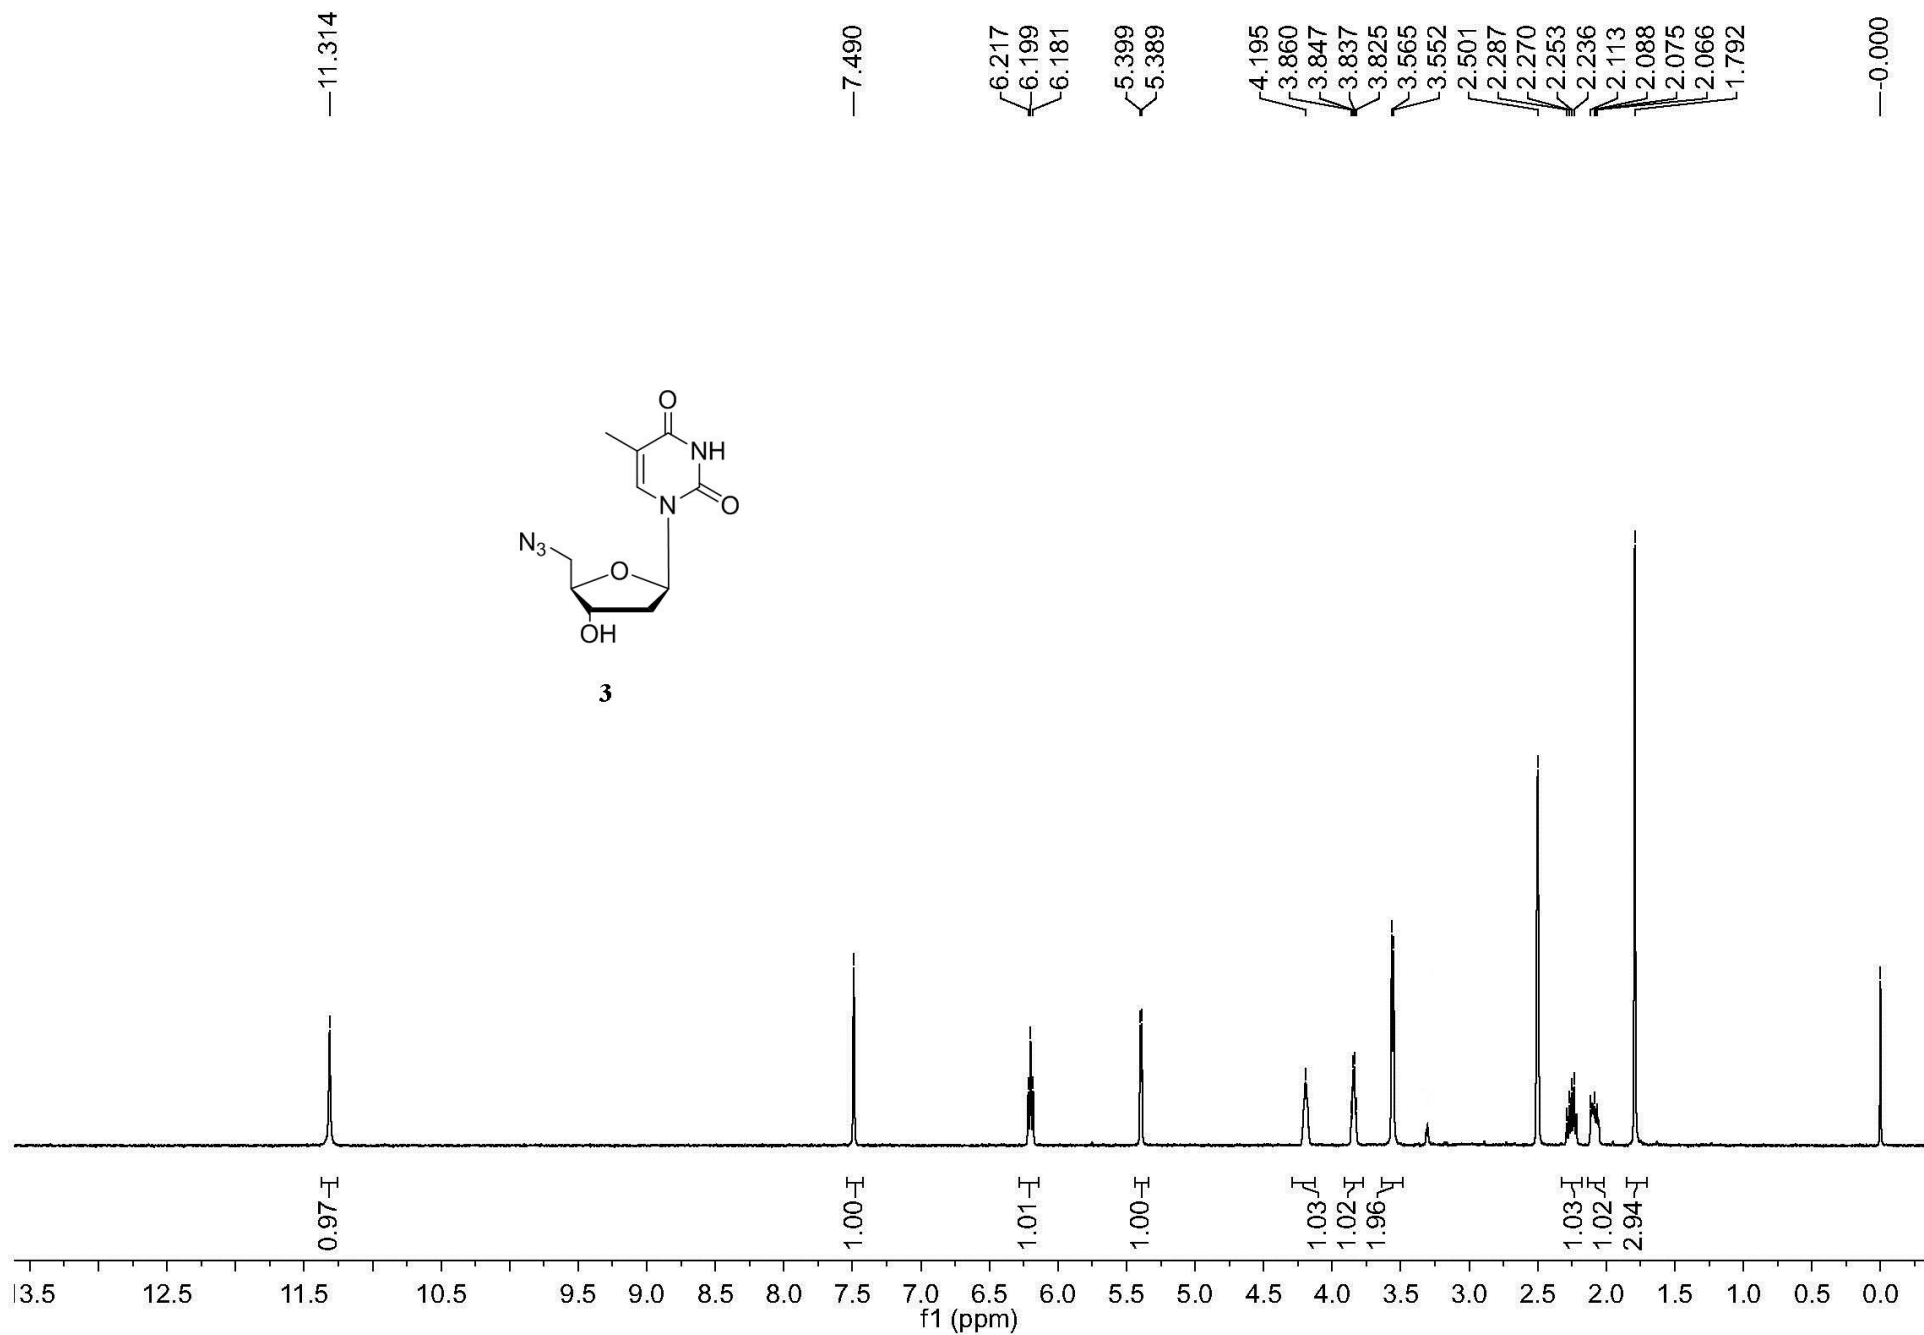

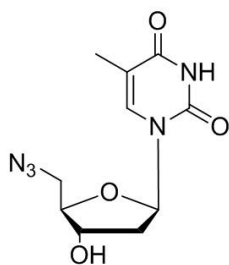

3

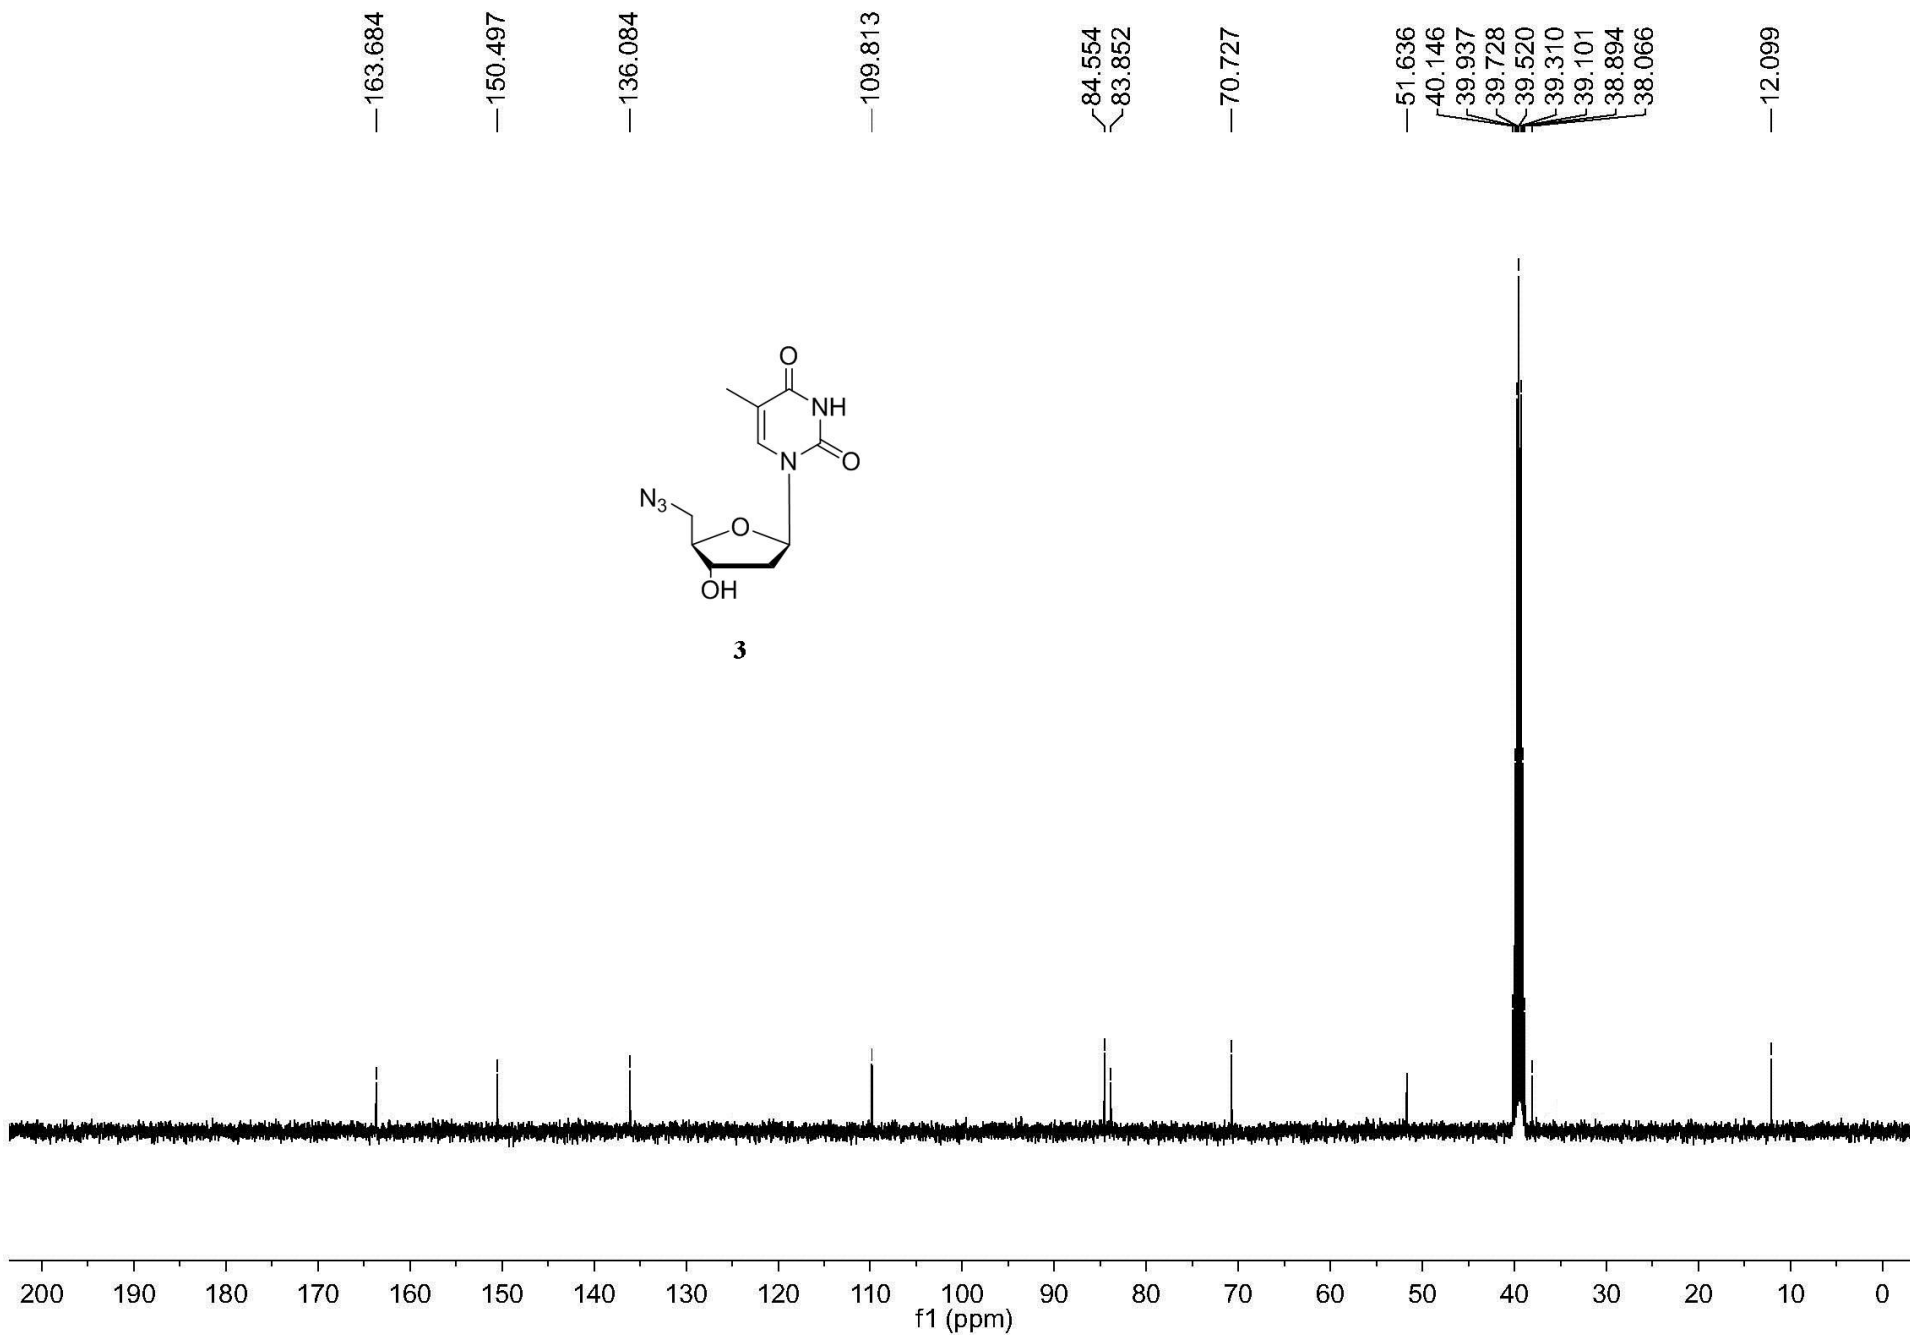



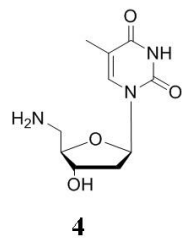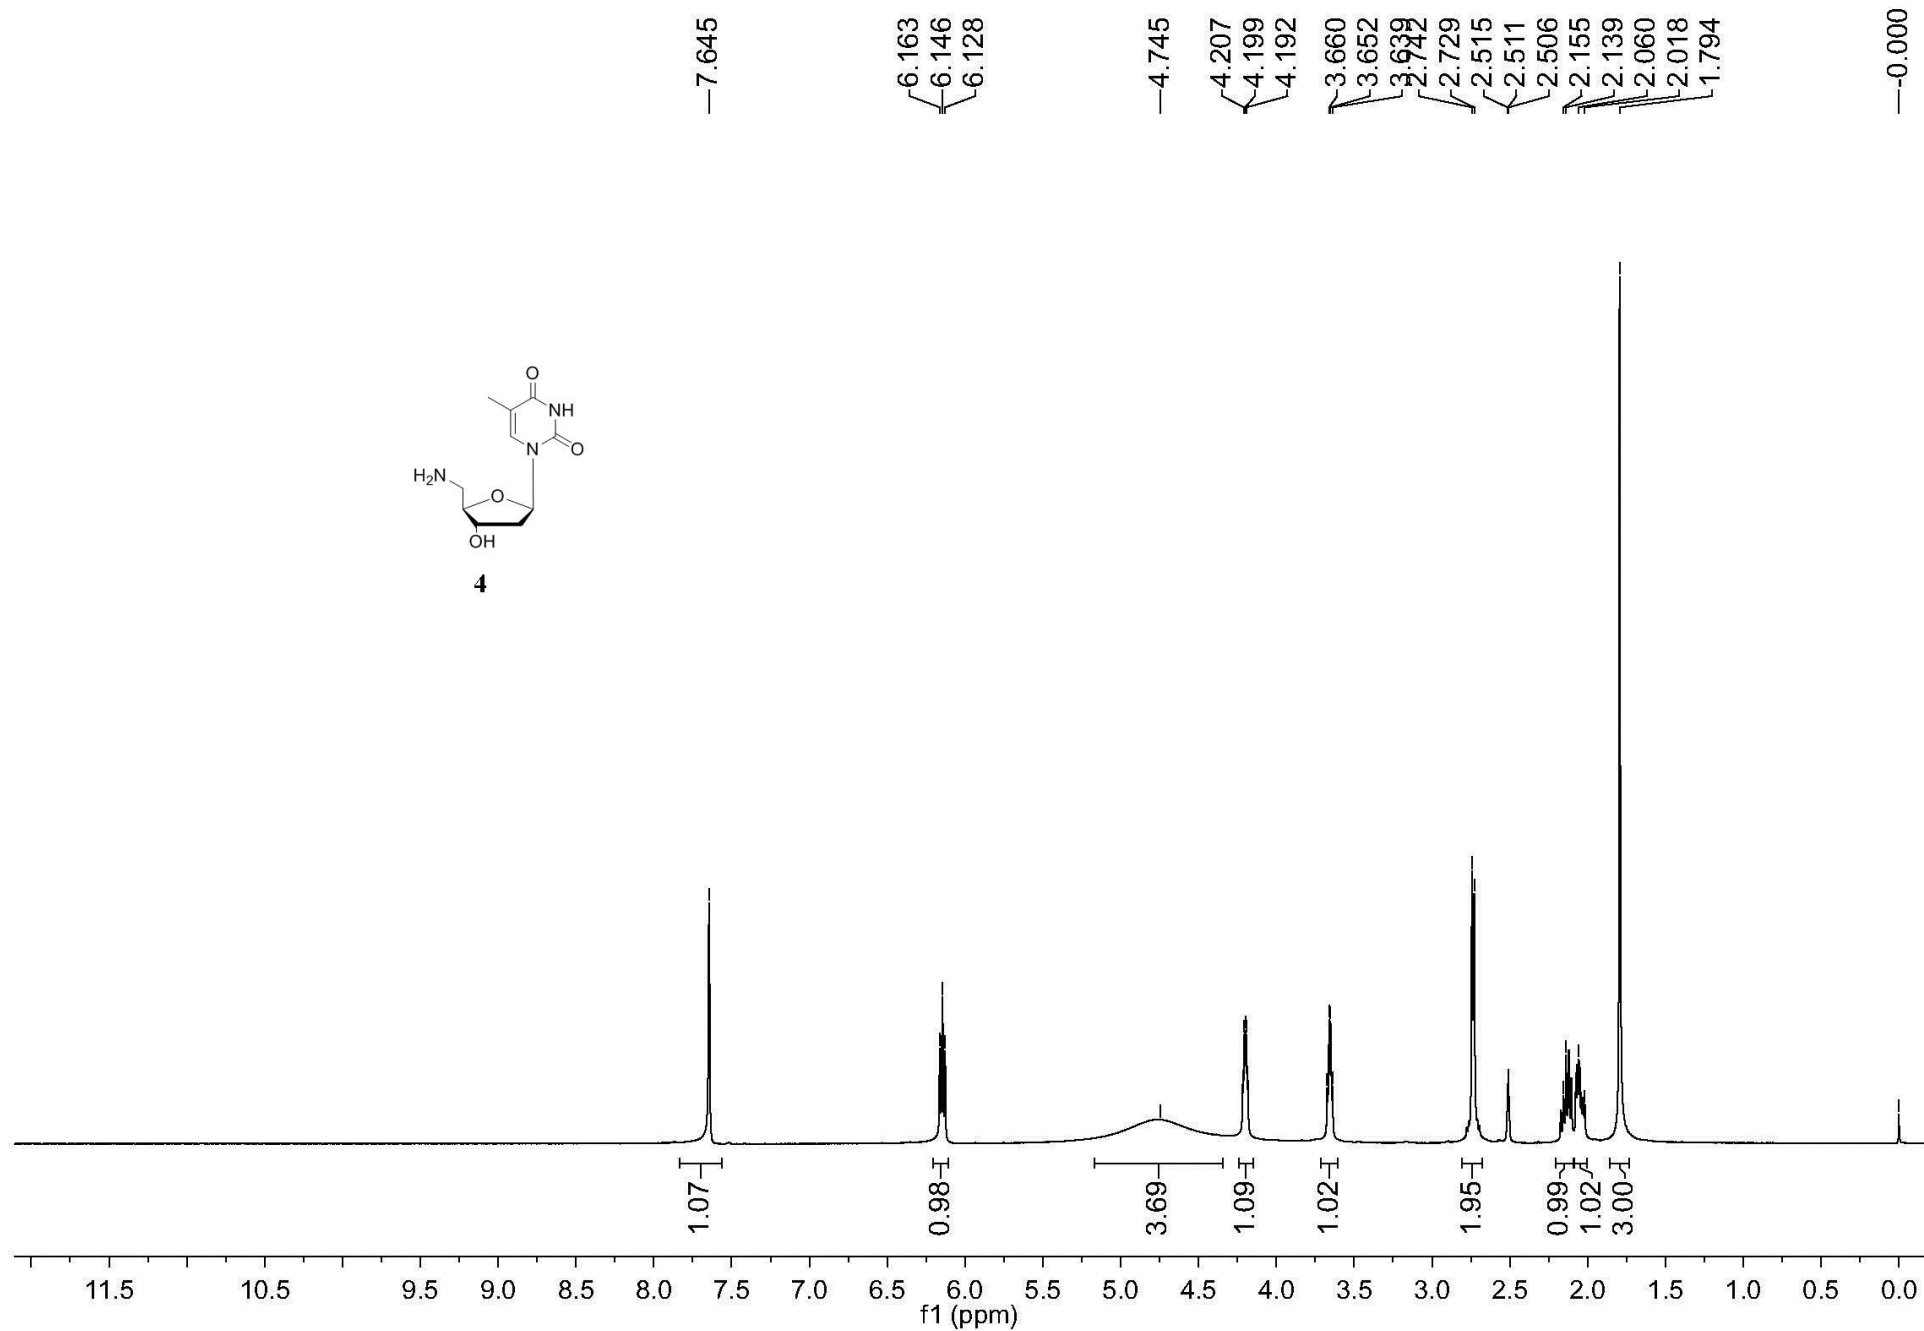

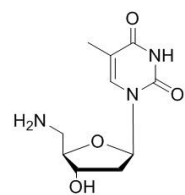

4

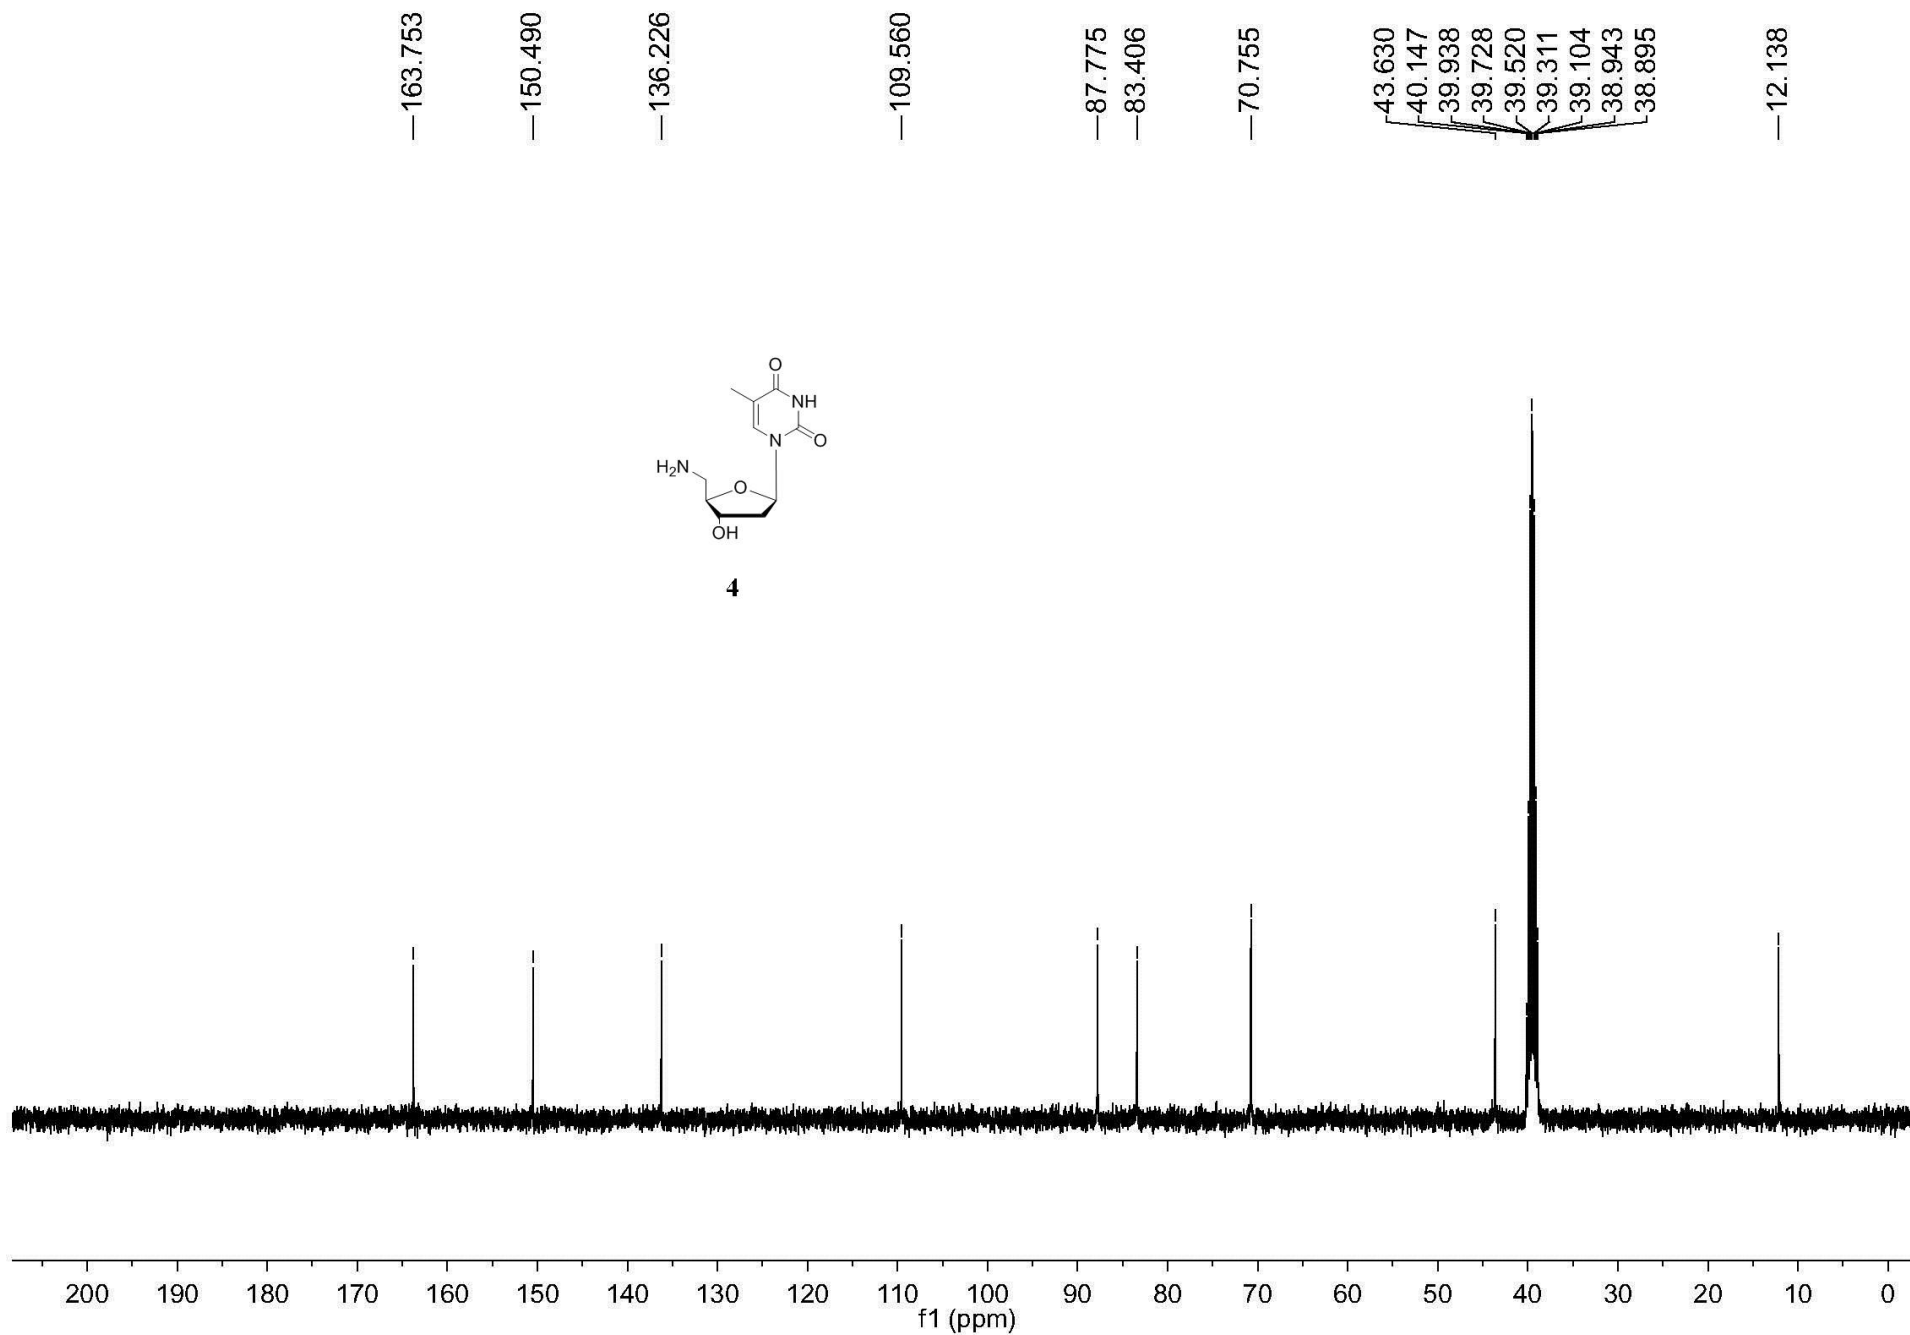

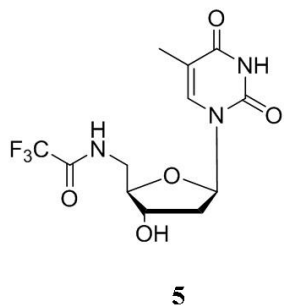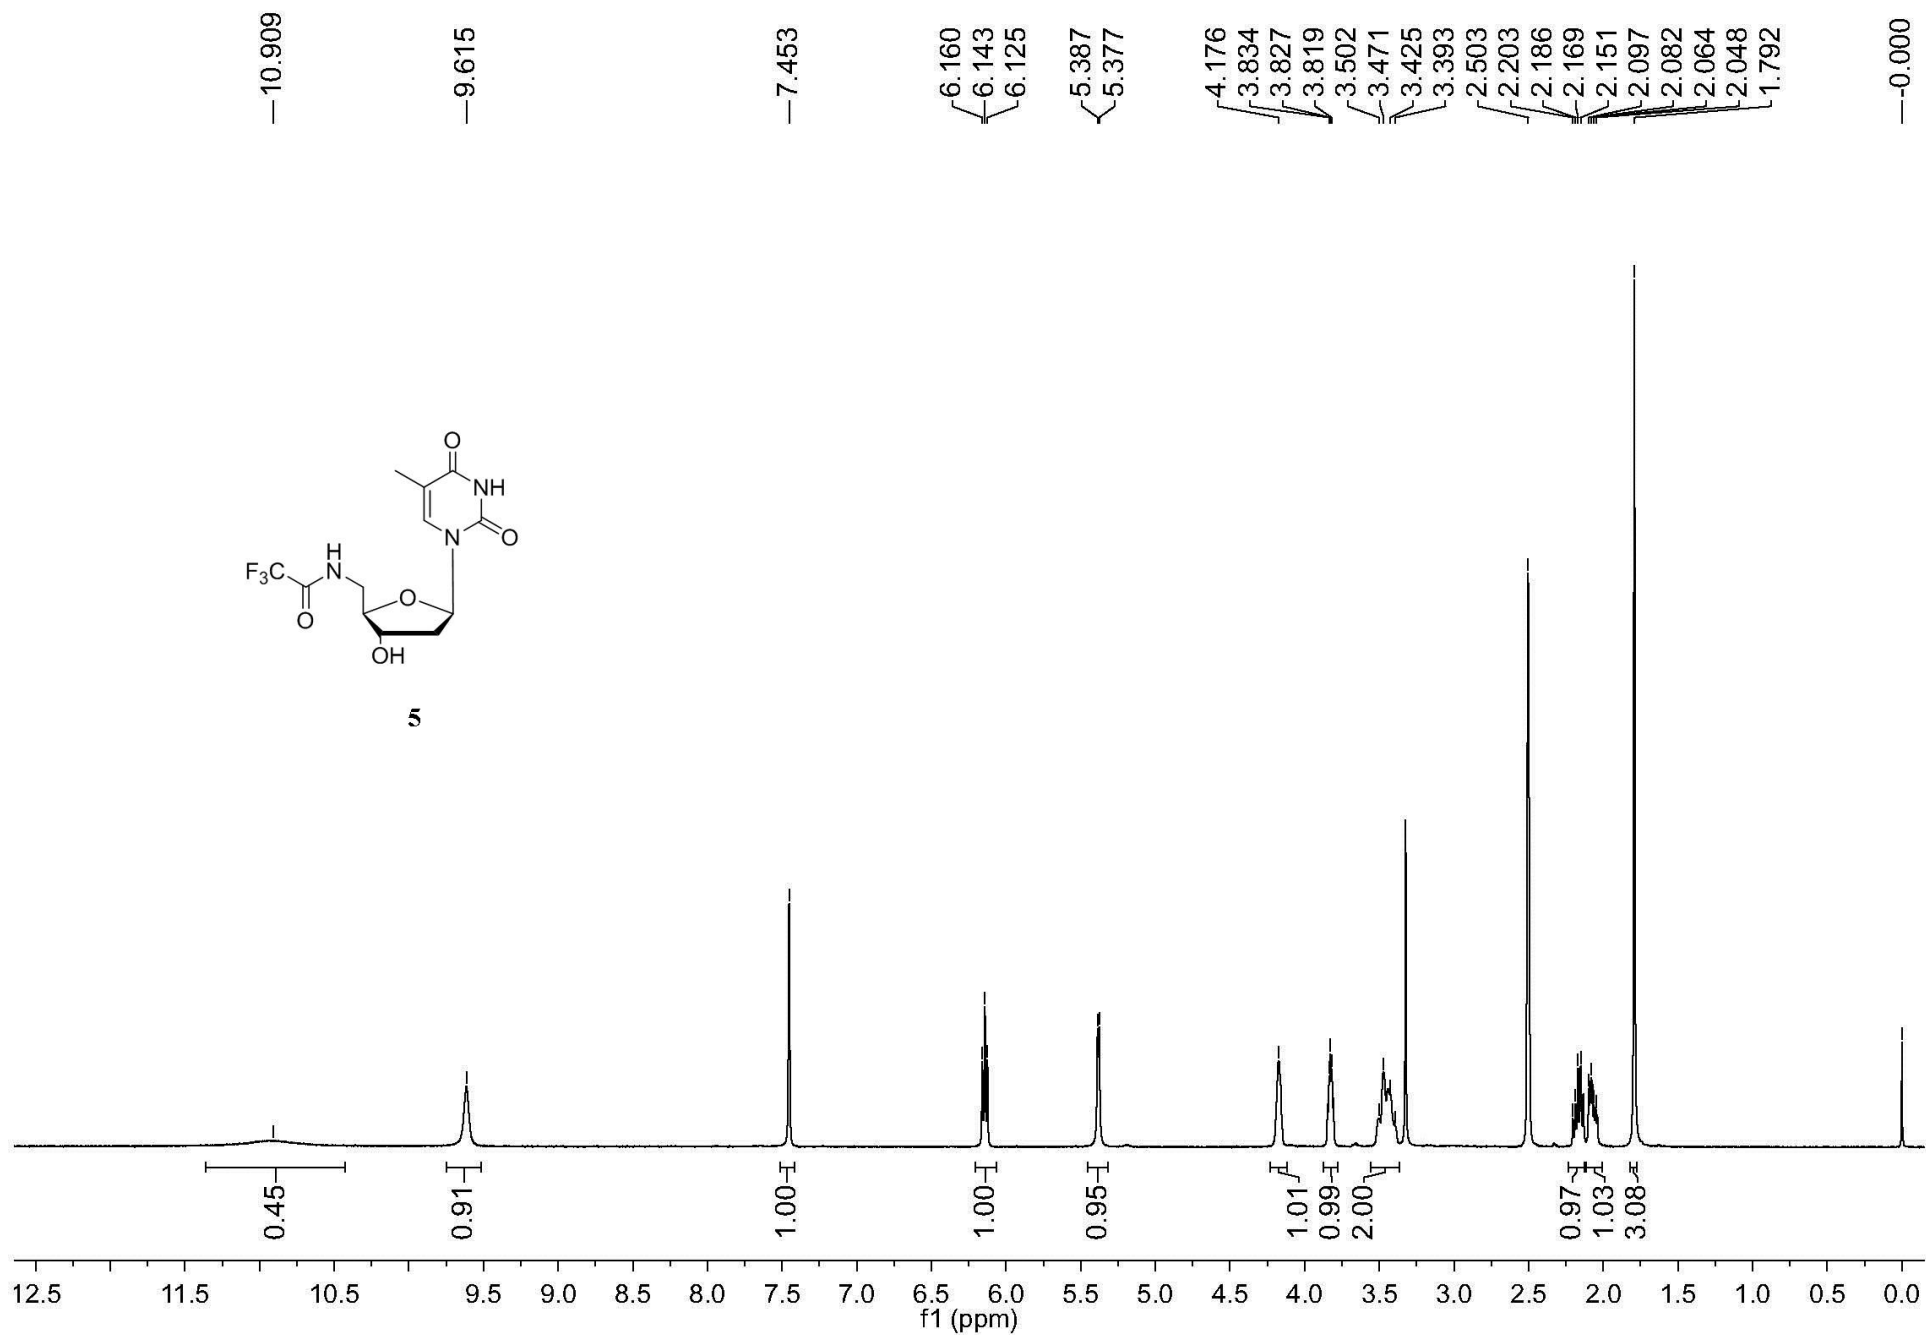

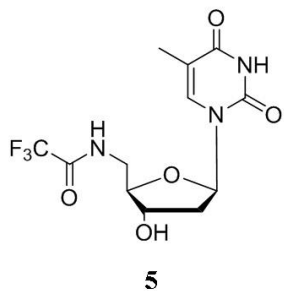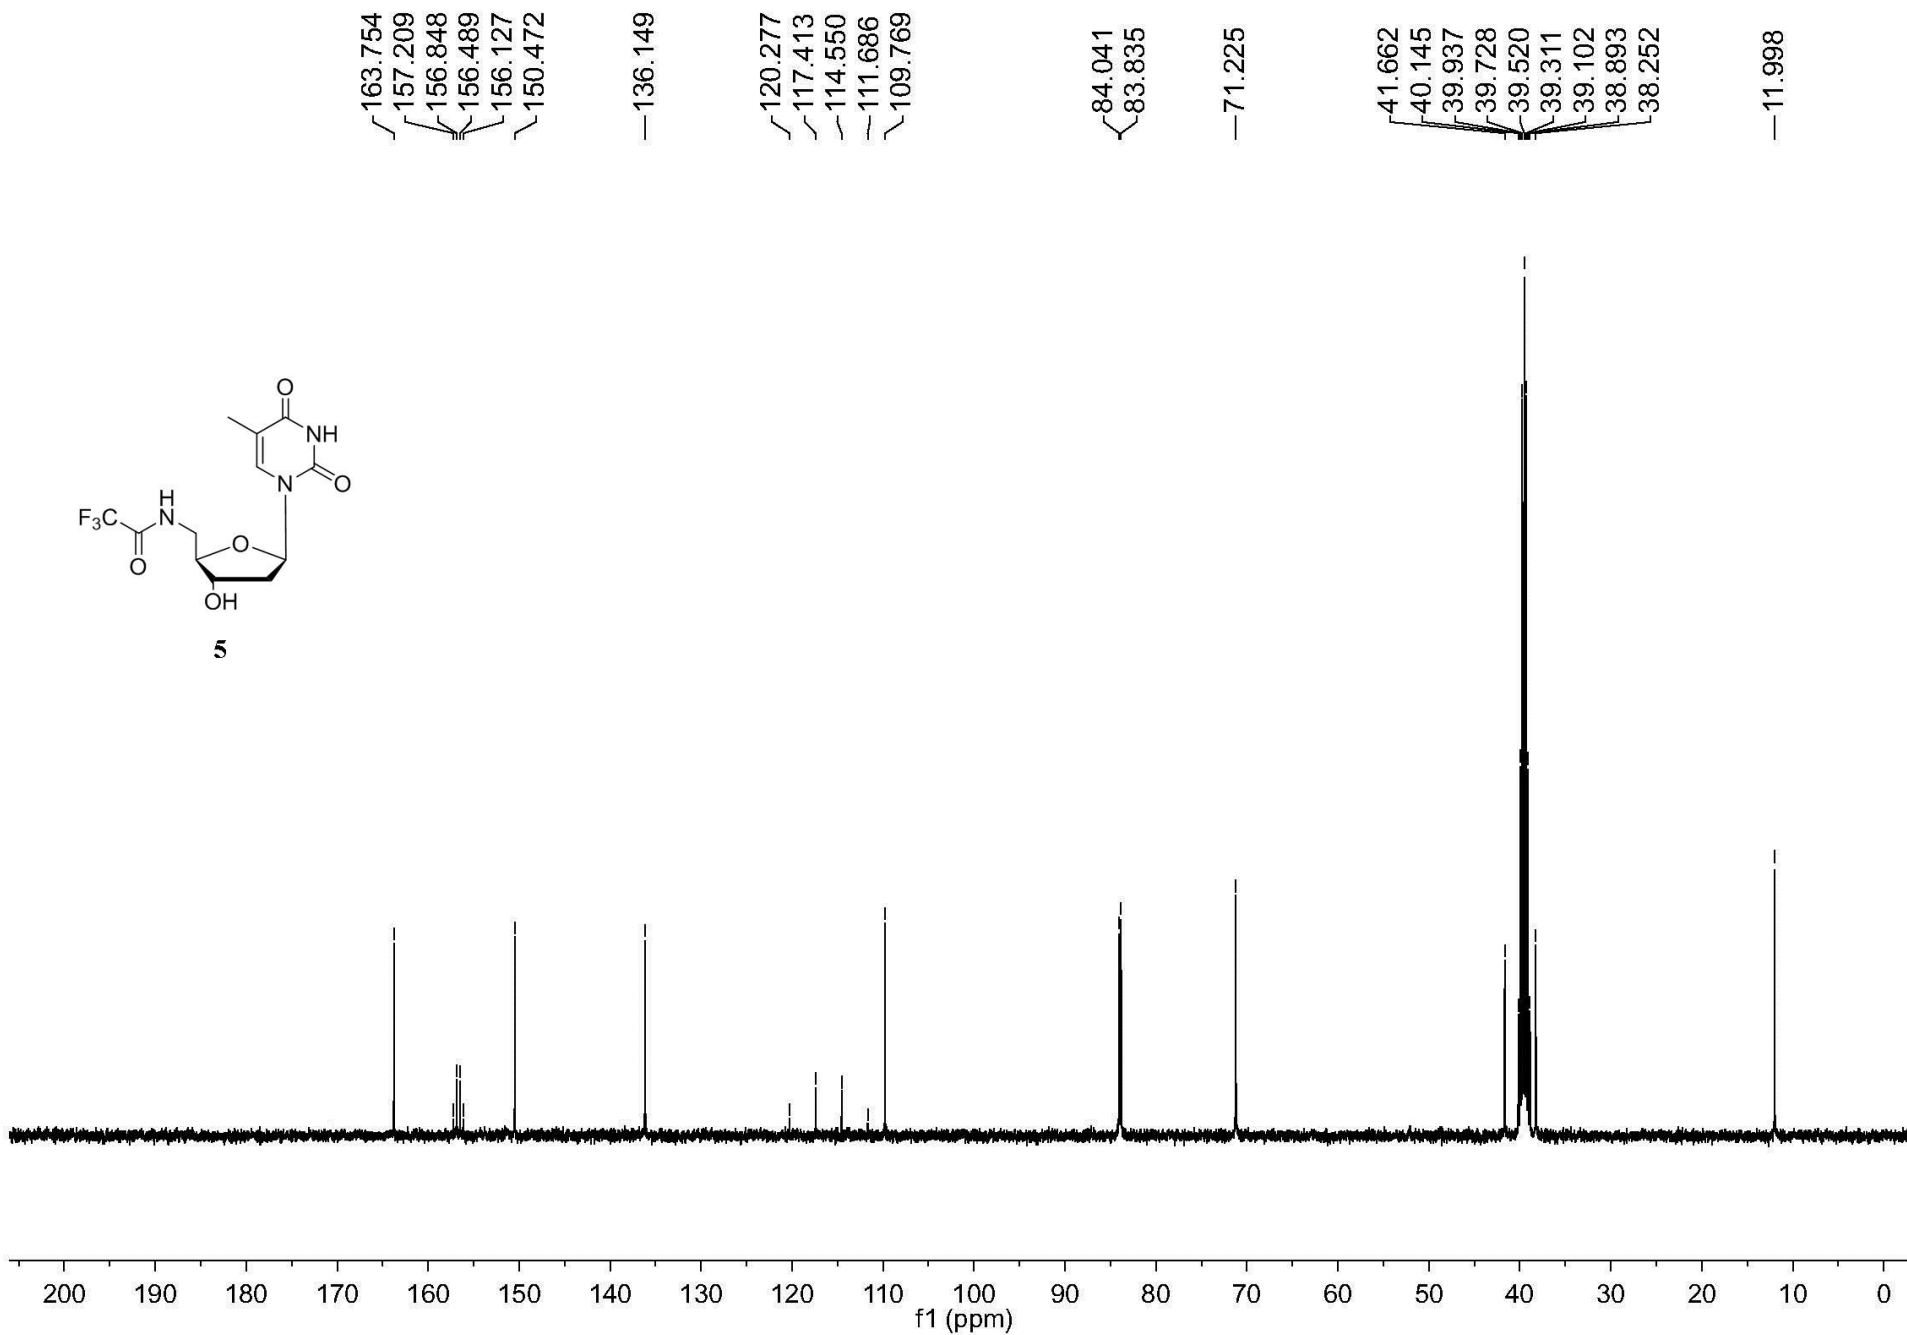

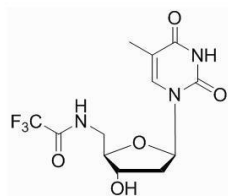

5

--74.233

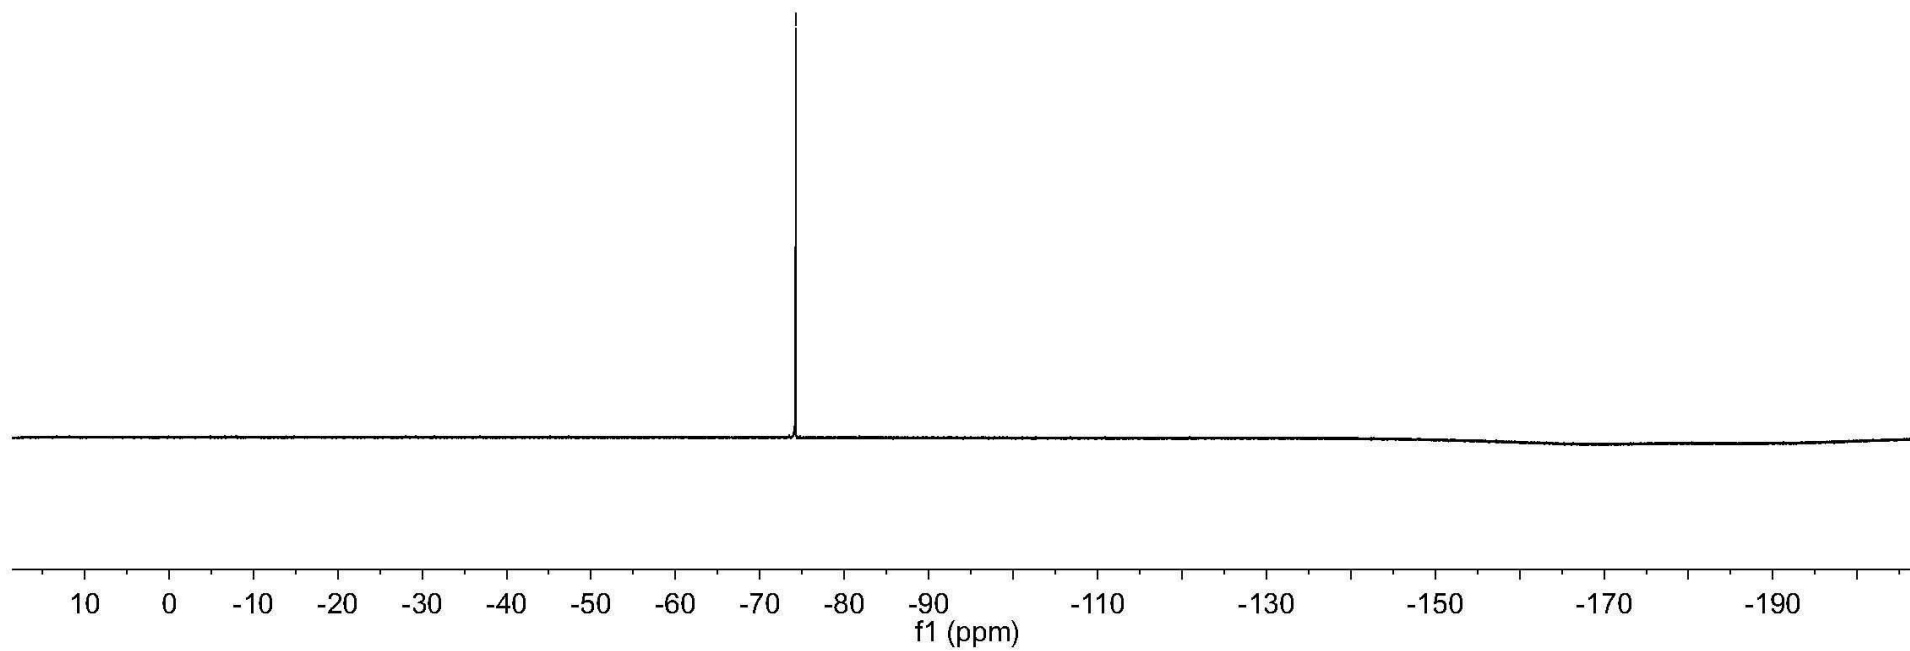

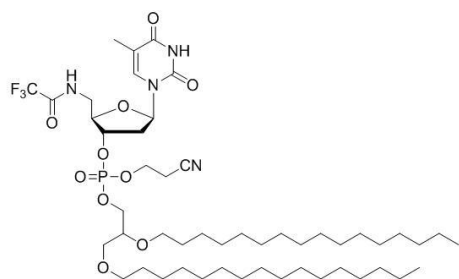

**6a**

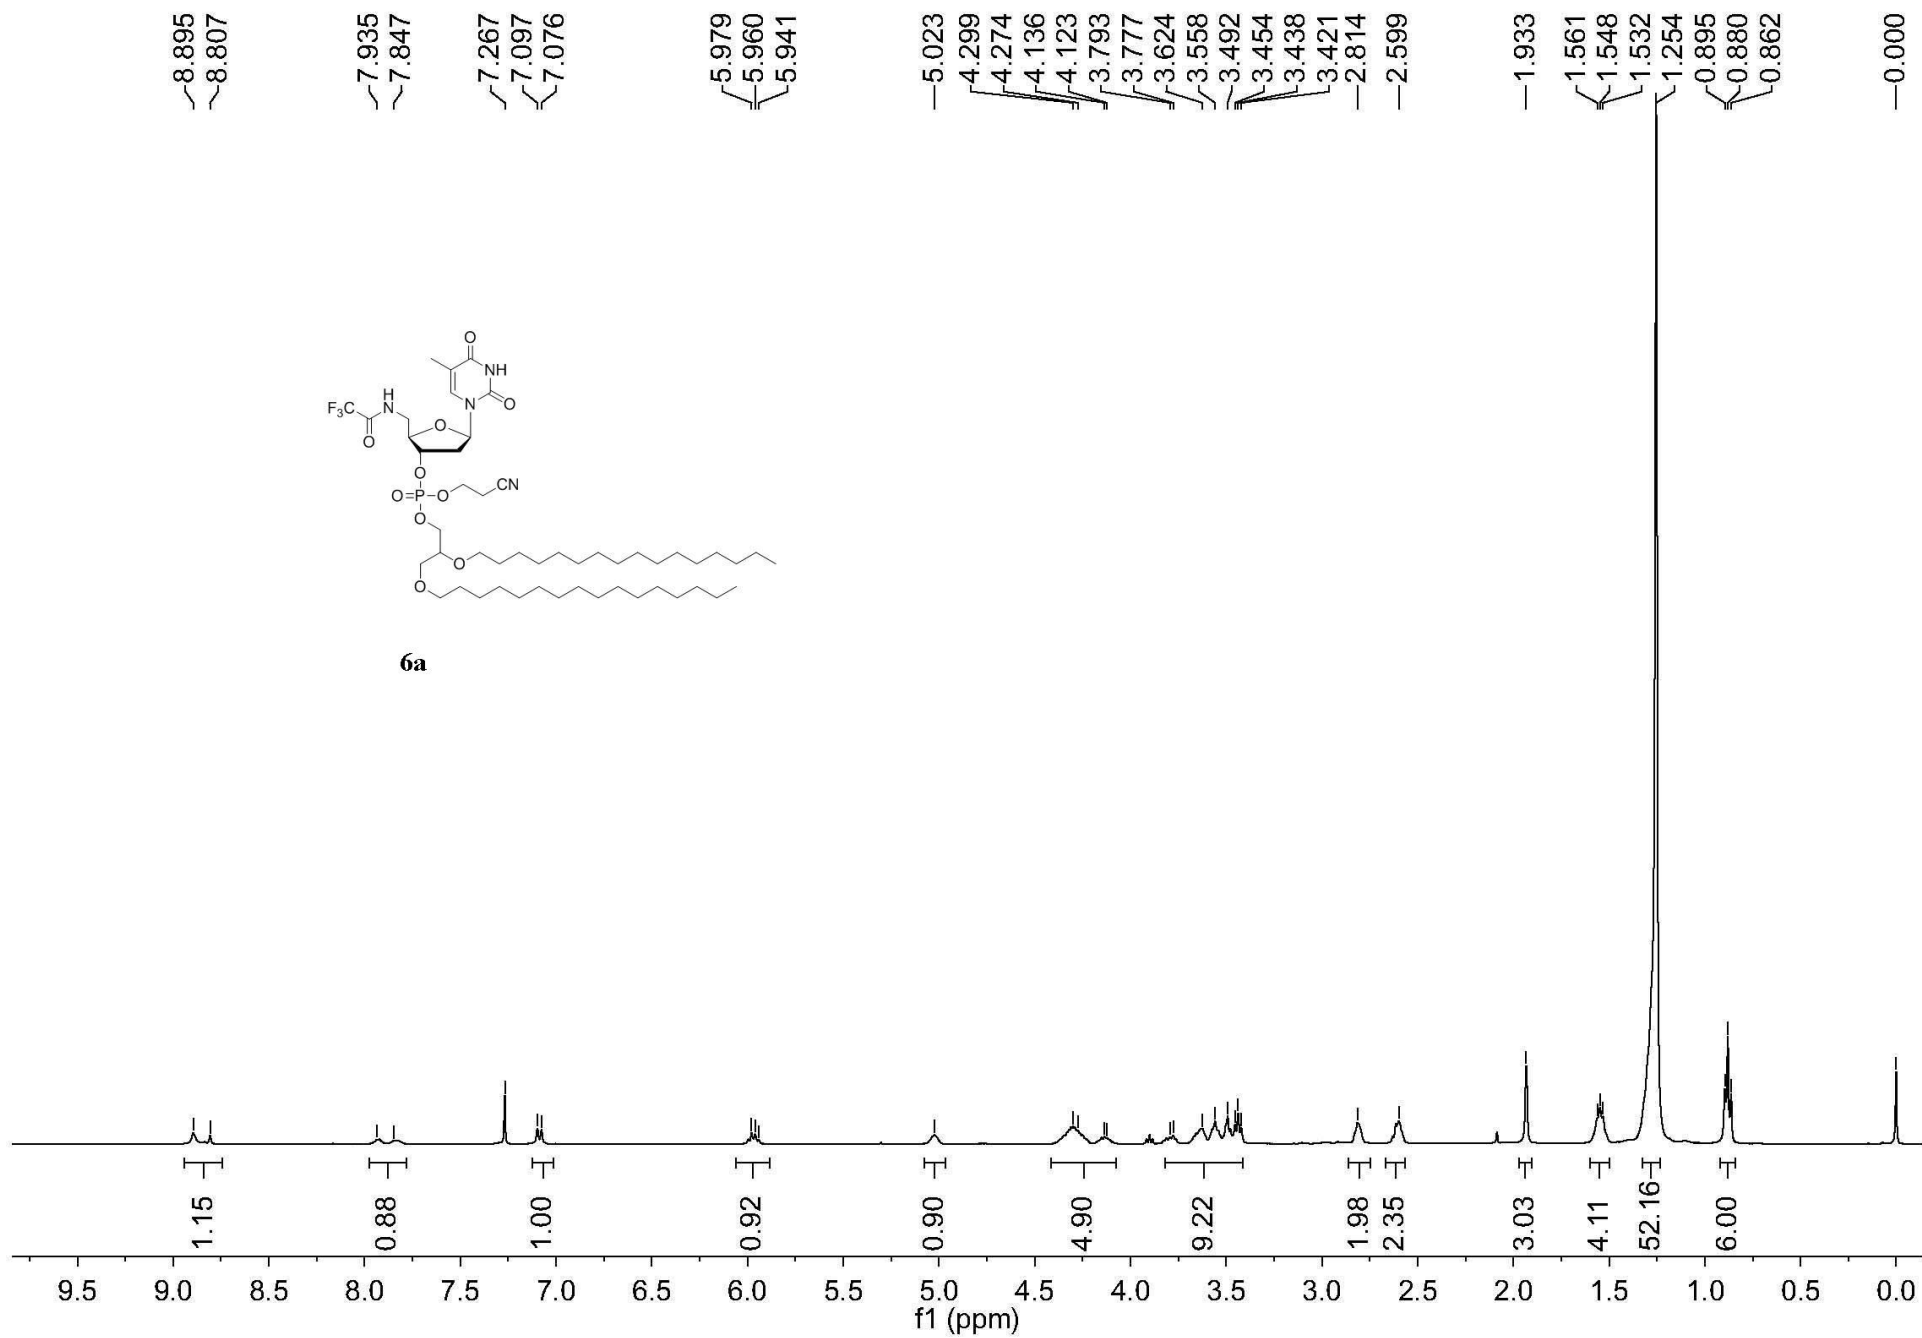

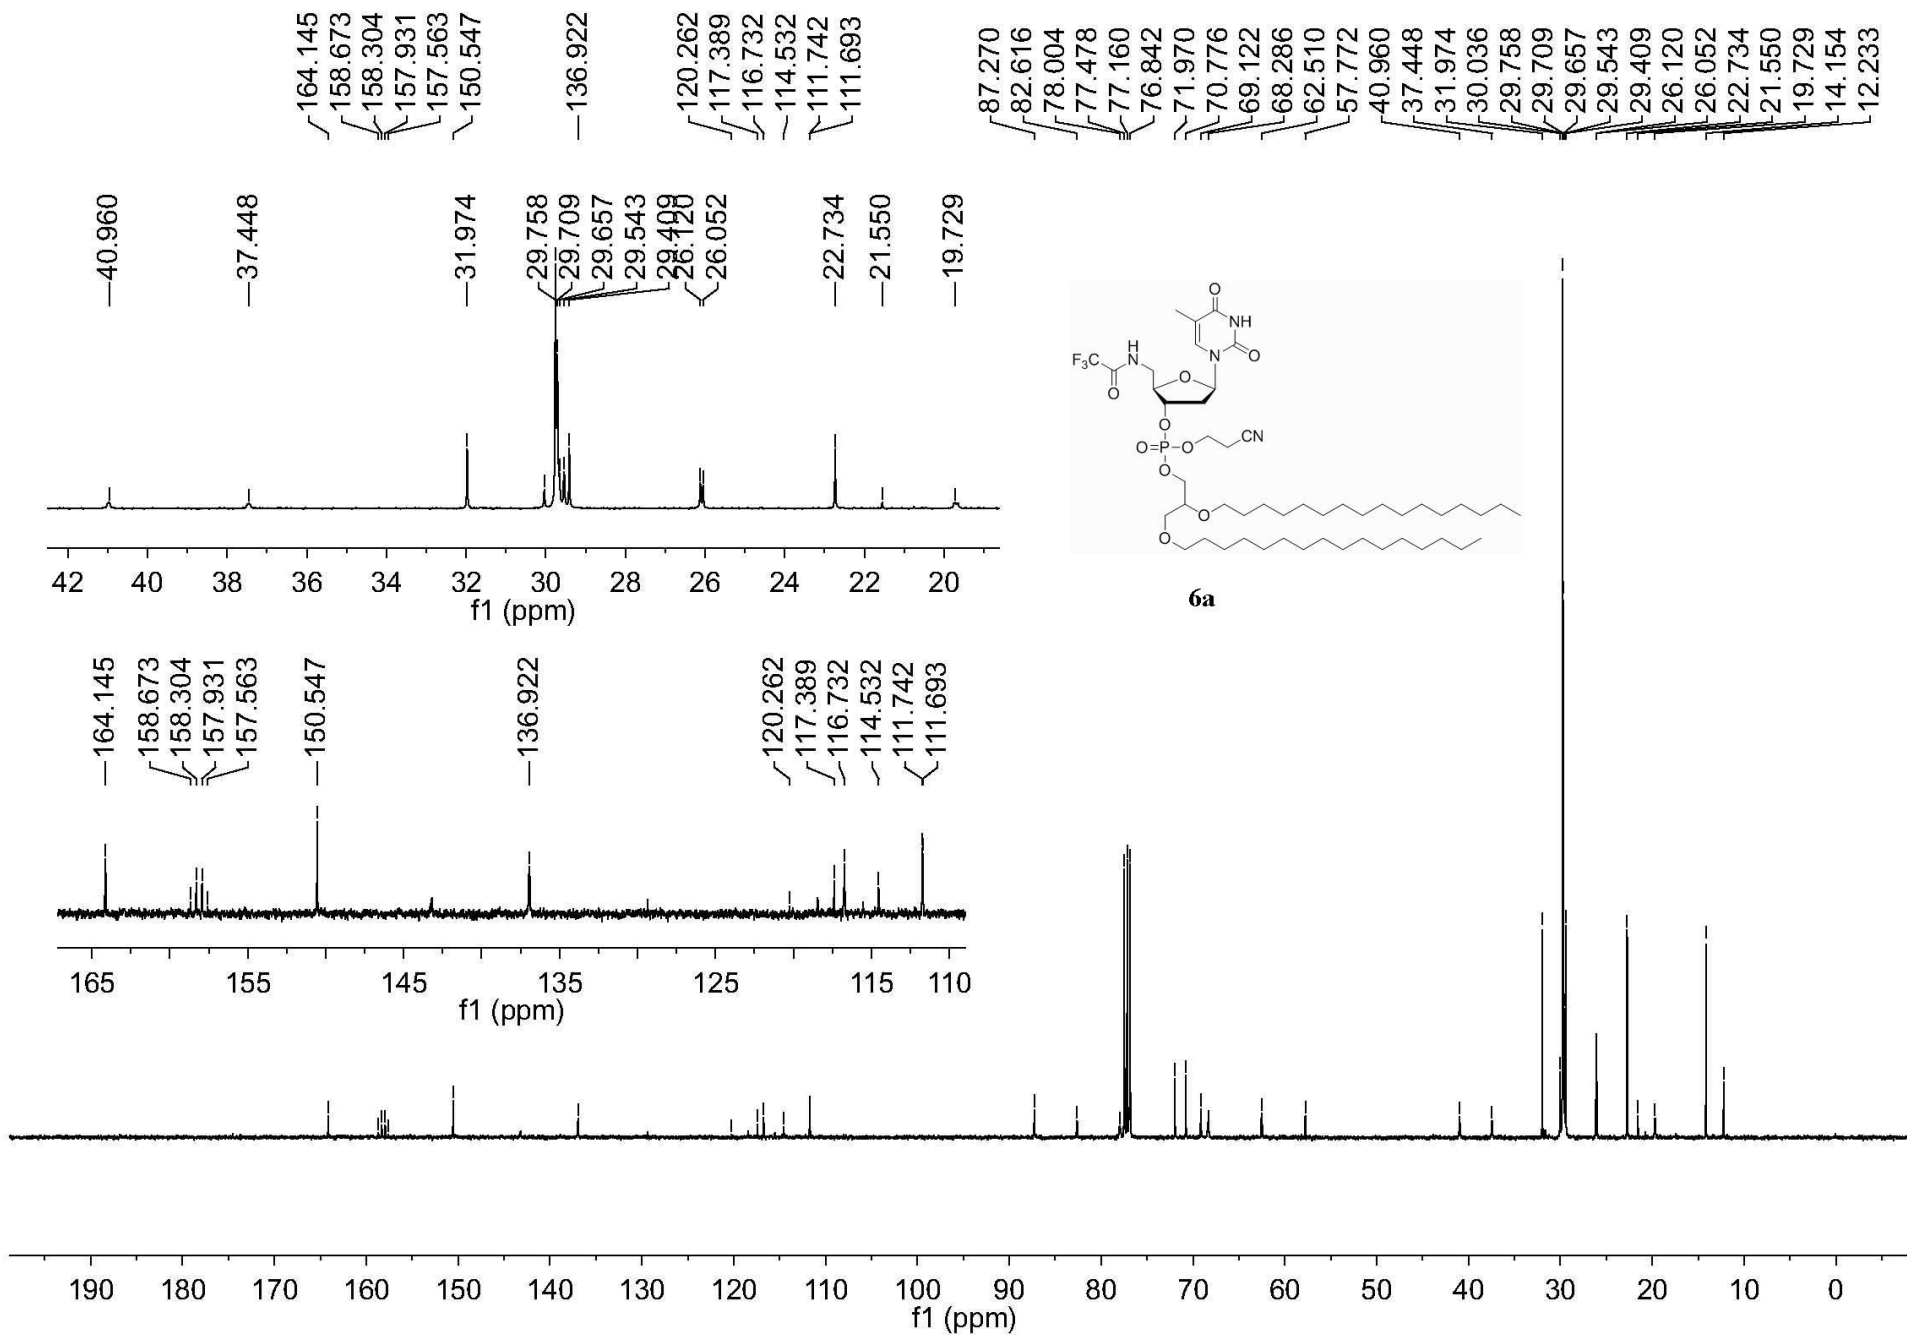

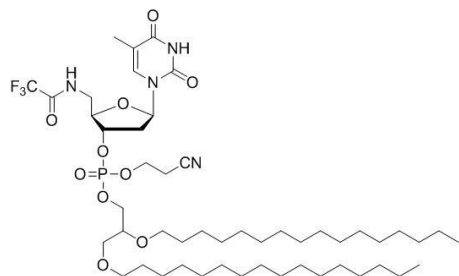

**6a**

2.168  
2.269  
2.316

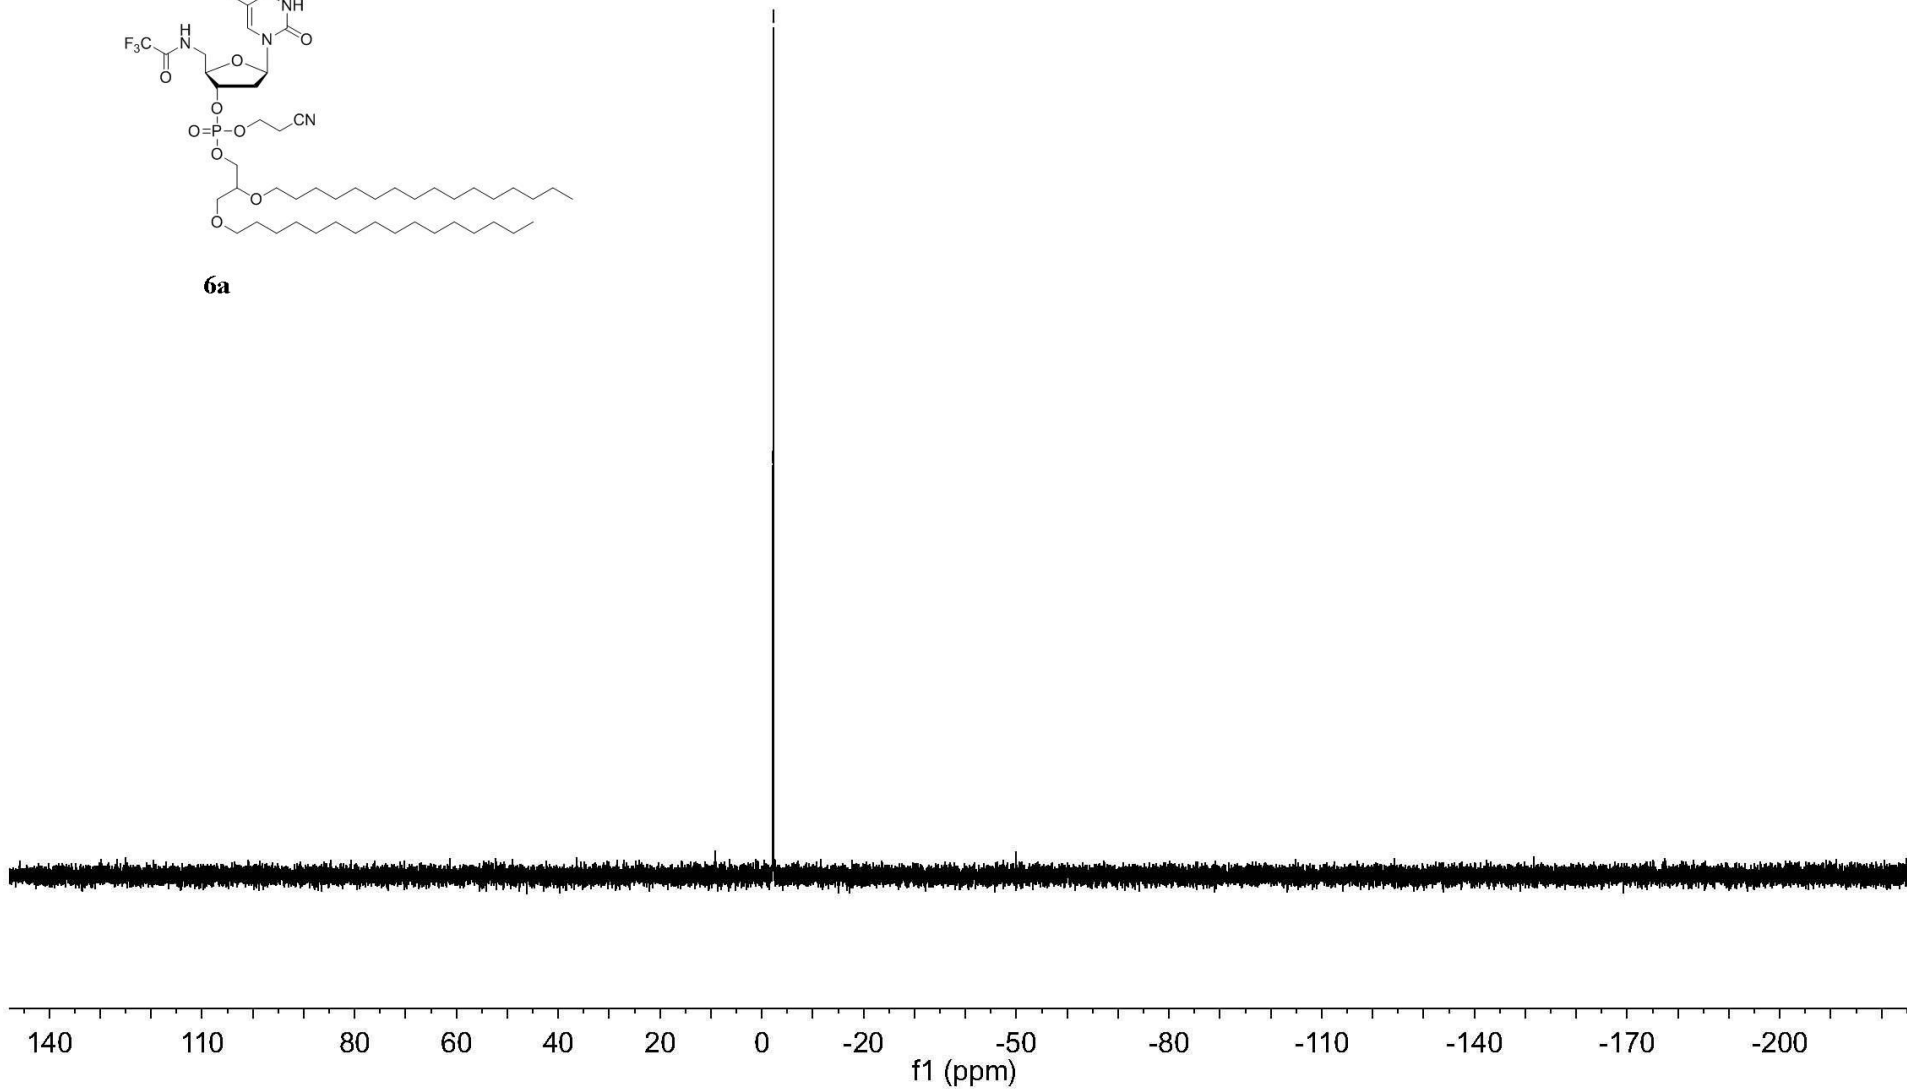



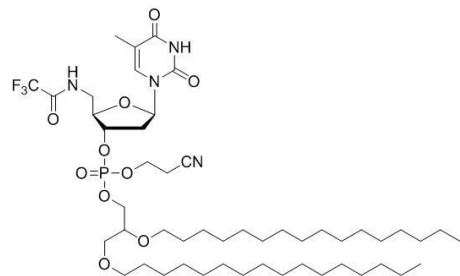

**6a**

75.585  
75.622  
75.630

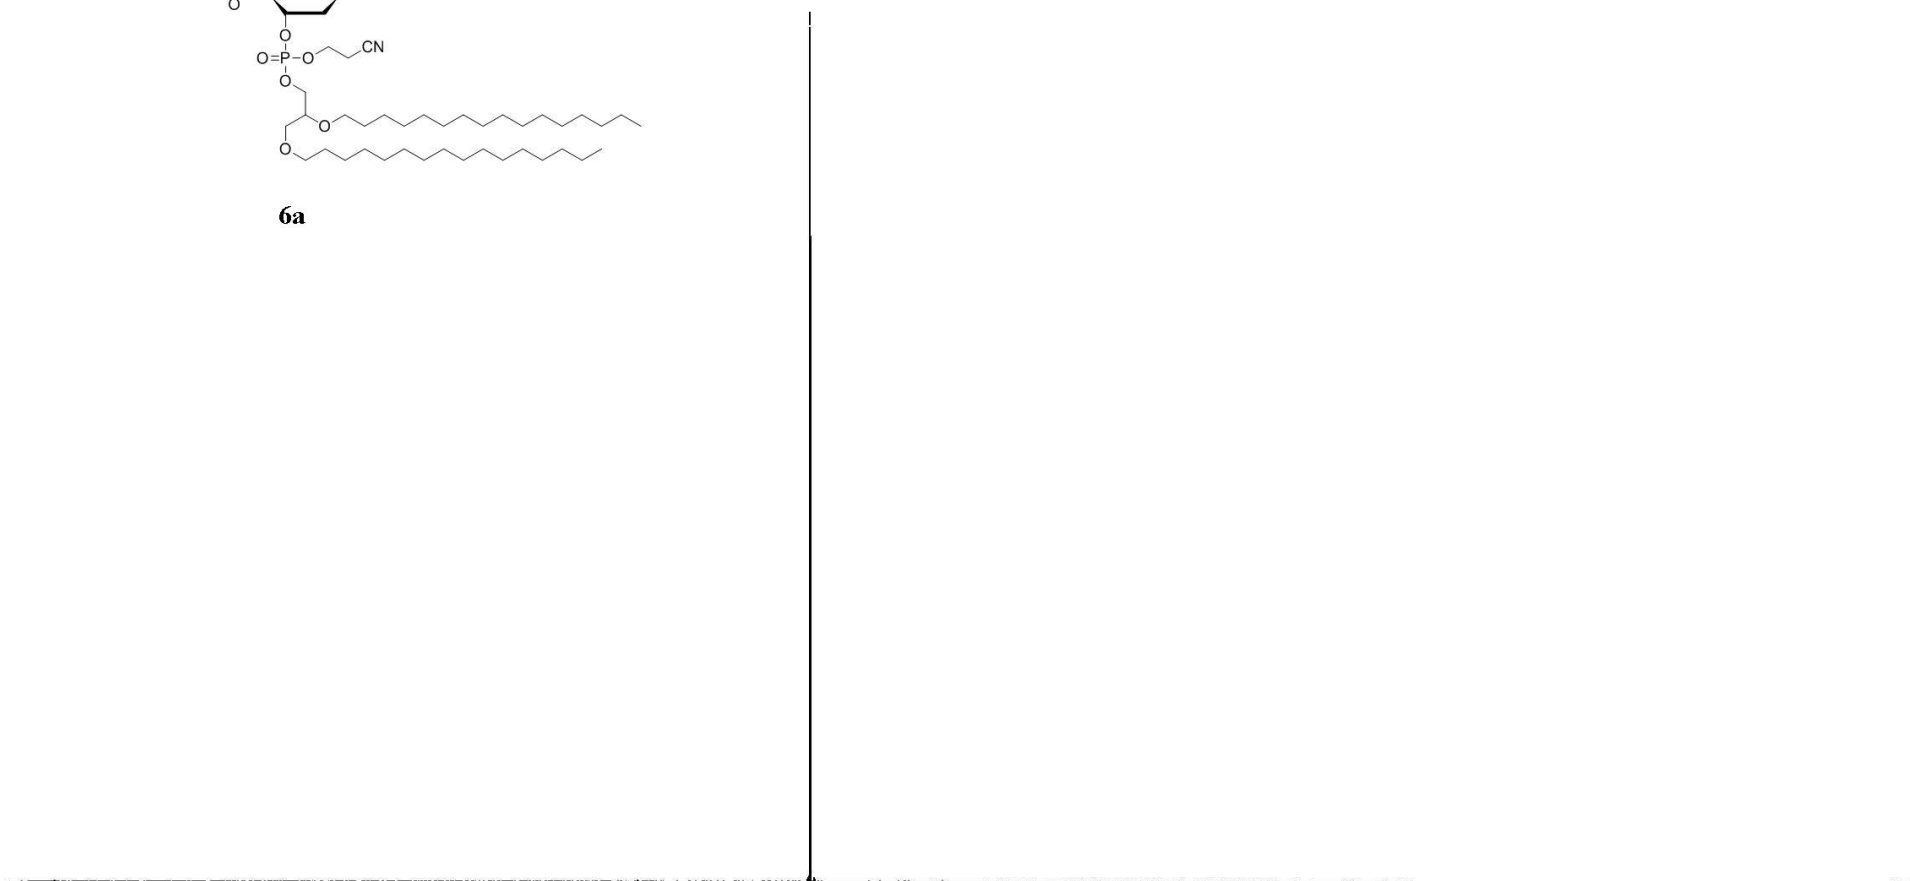

10 0 -10 -20 -30 -40 -50 -60 -70 -80 -90 -110 -130 -150 -170 -190  
f1 (ppm)

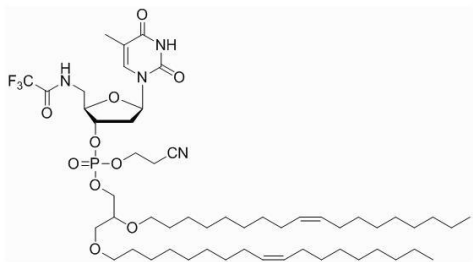

**6b**

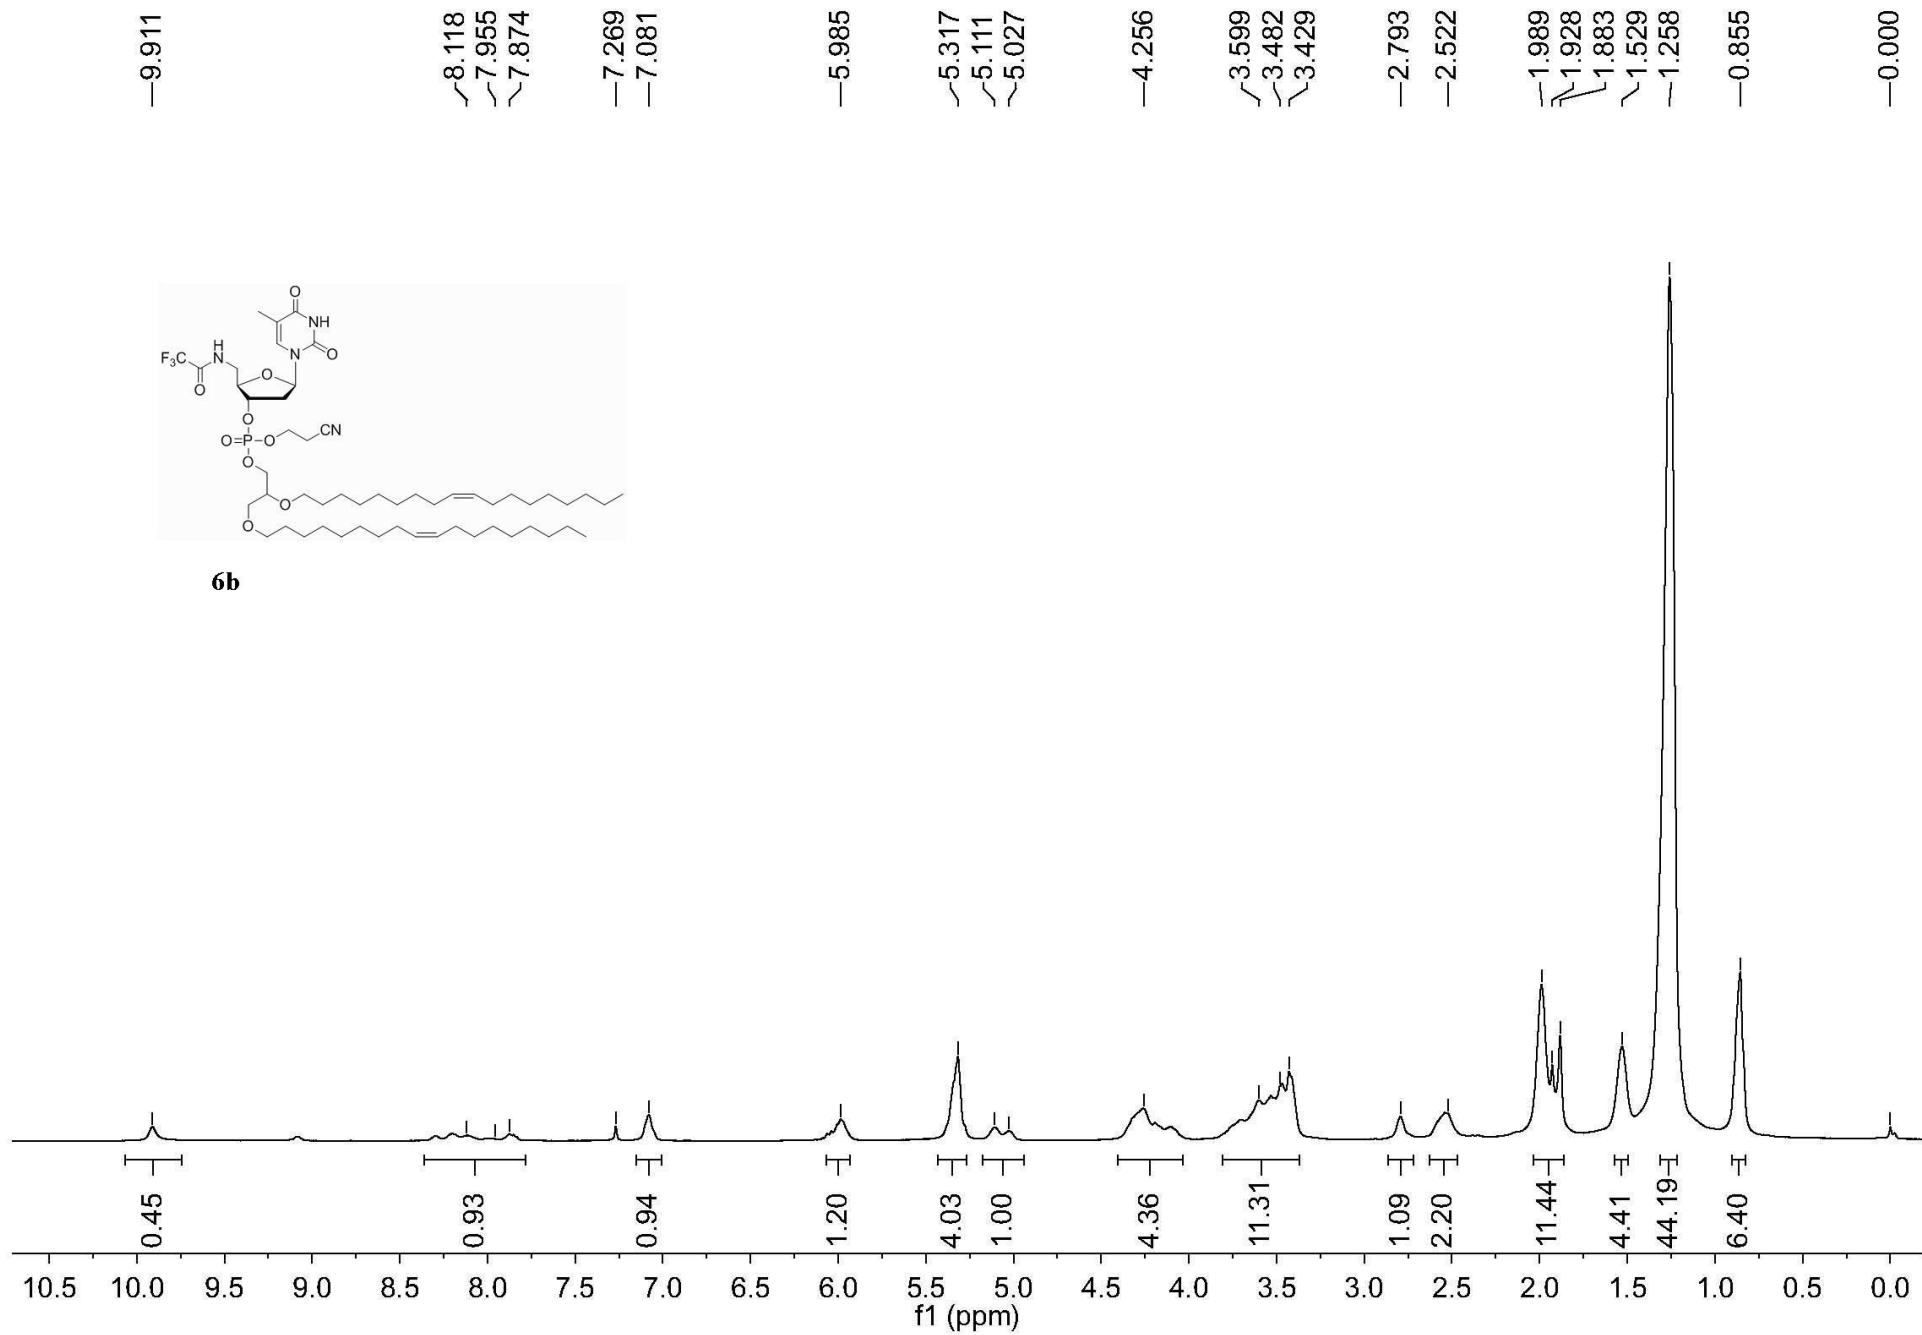

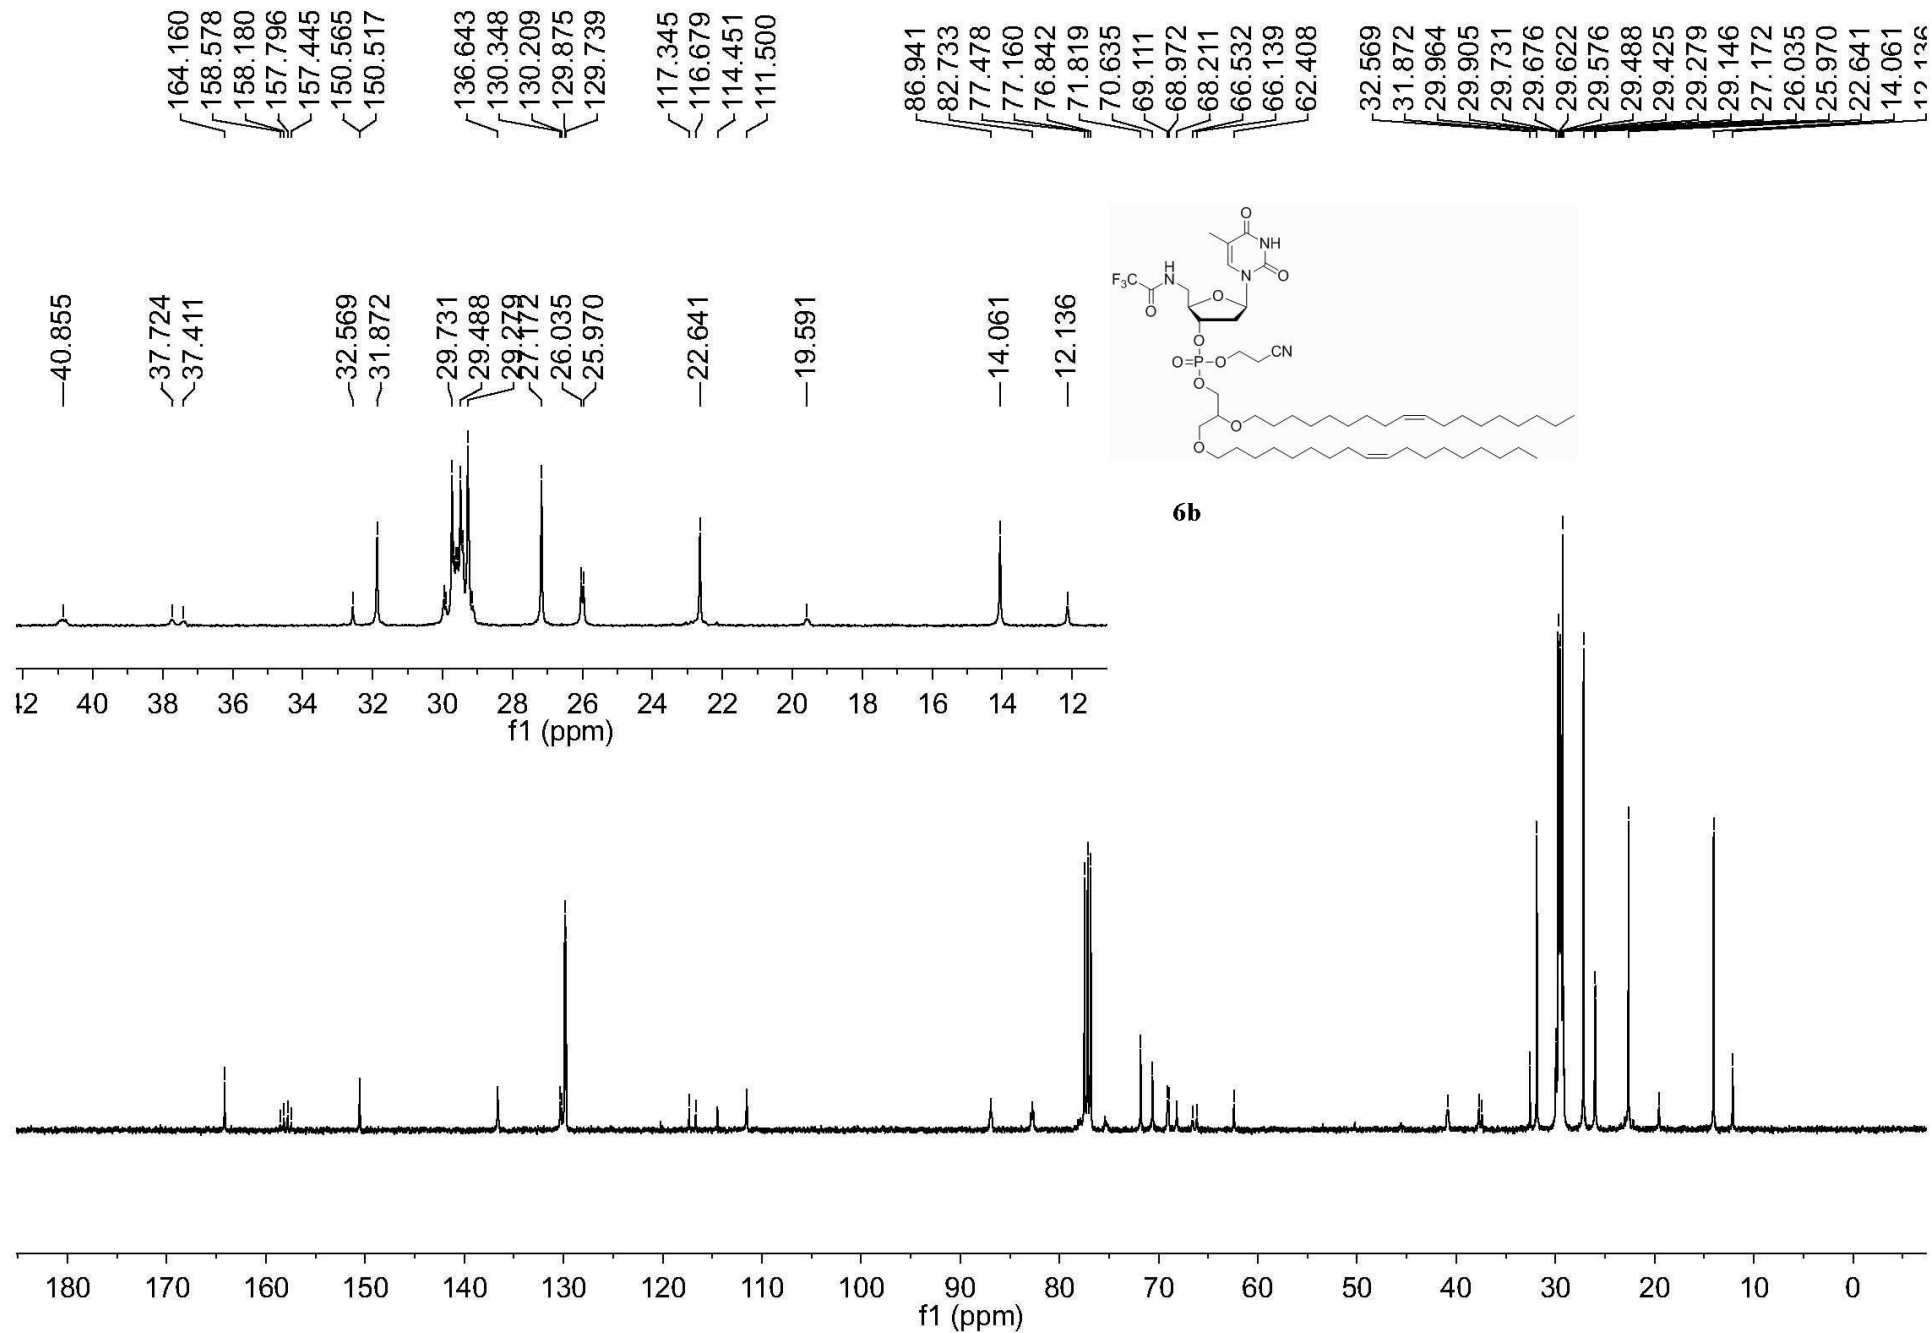

14.120  
 9.141  
 9.086  
 8.945  
 8.882  
 -2.173  
 -2.257  
 -2.329

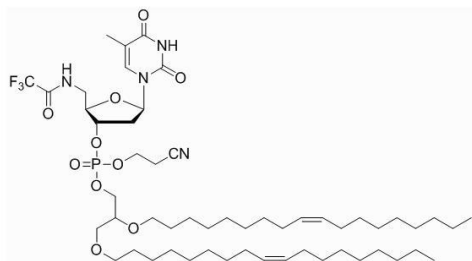

**6b**

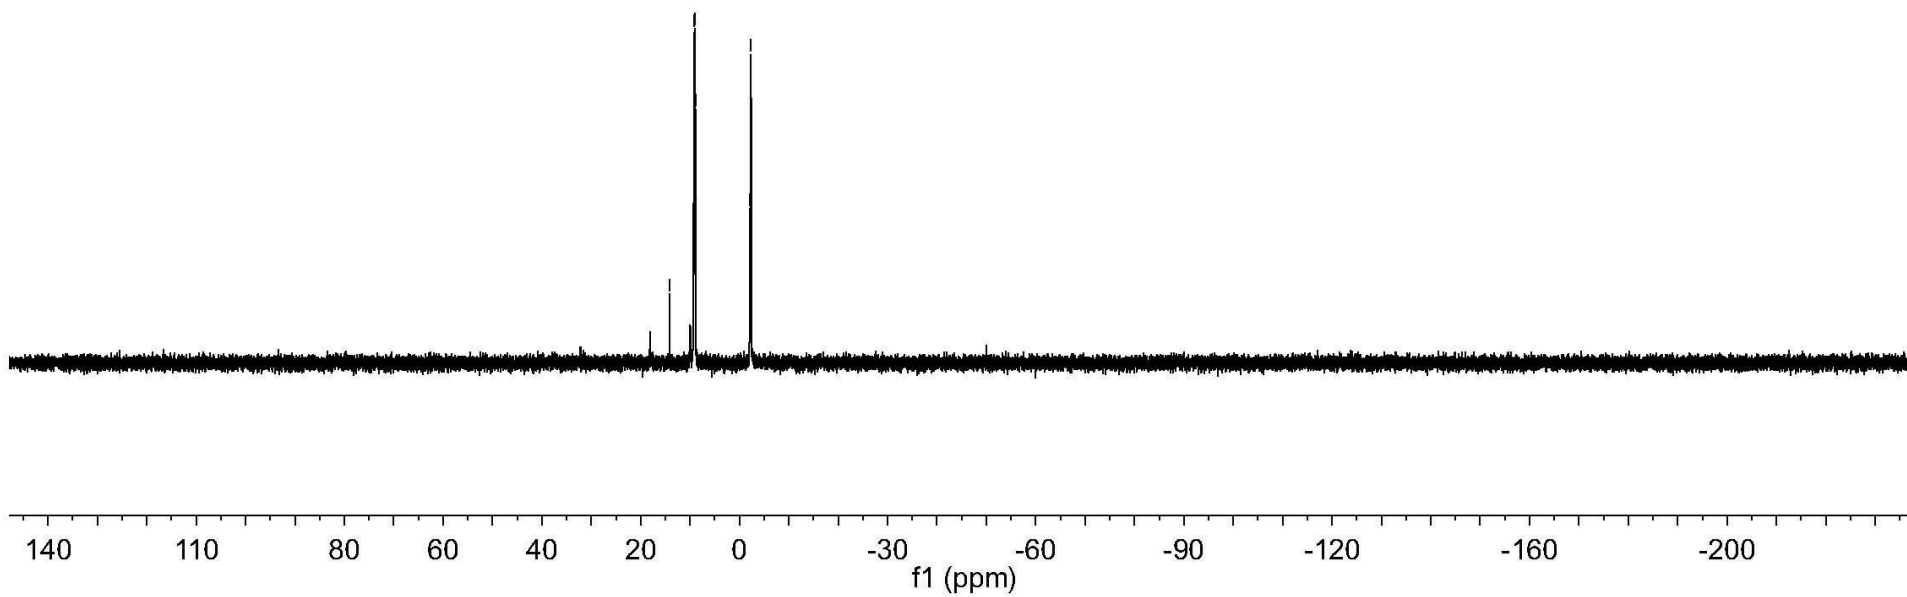

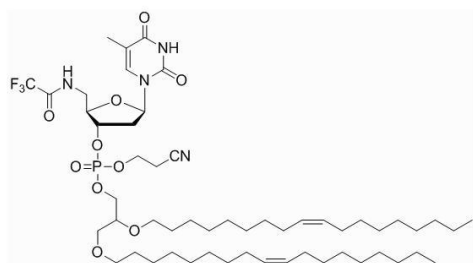

**6b**

-75.562  
-75.594

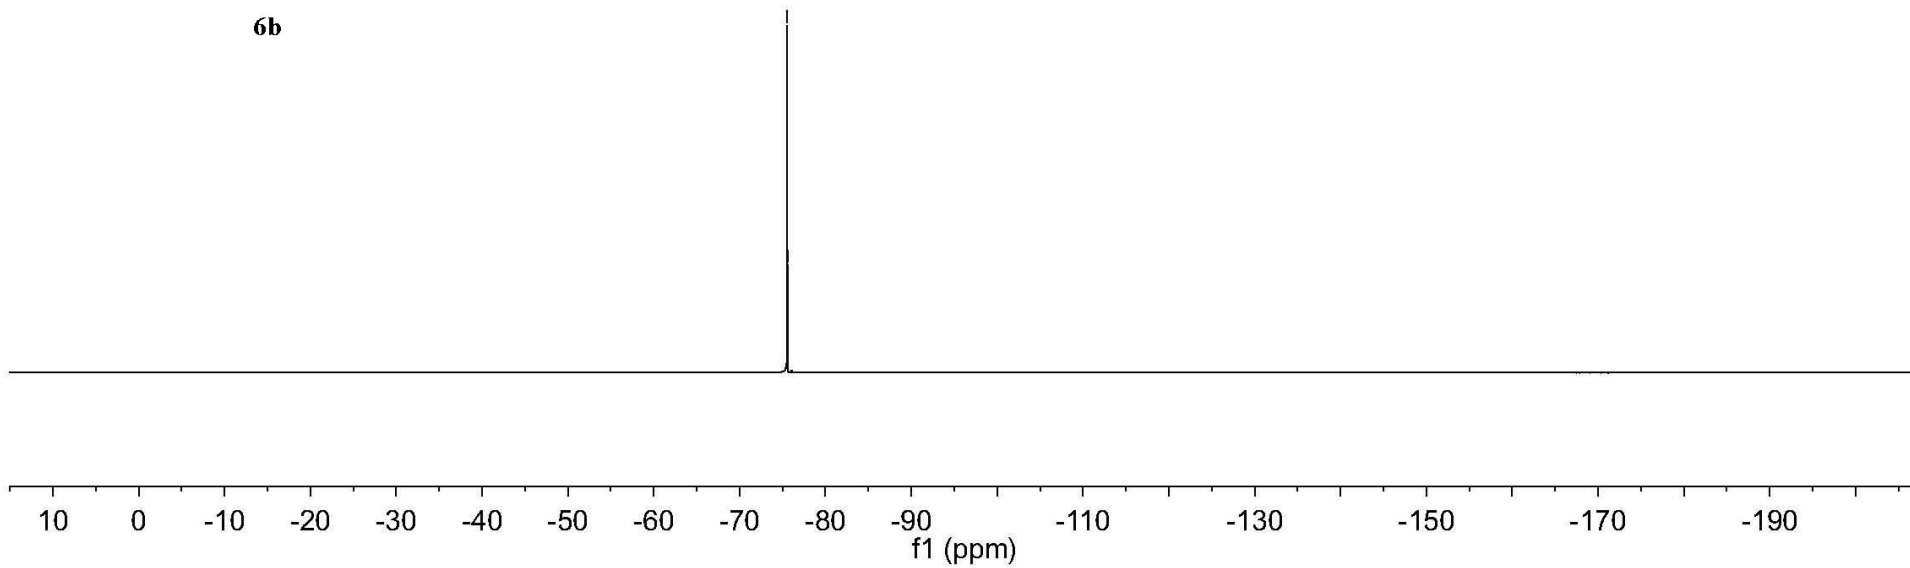

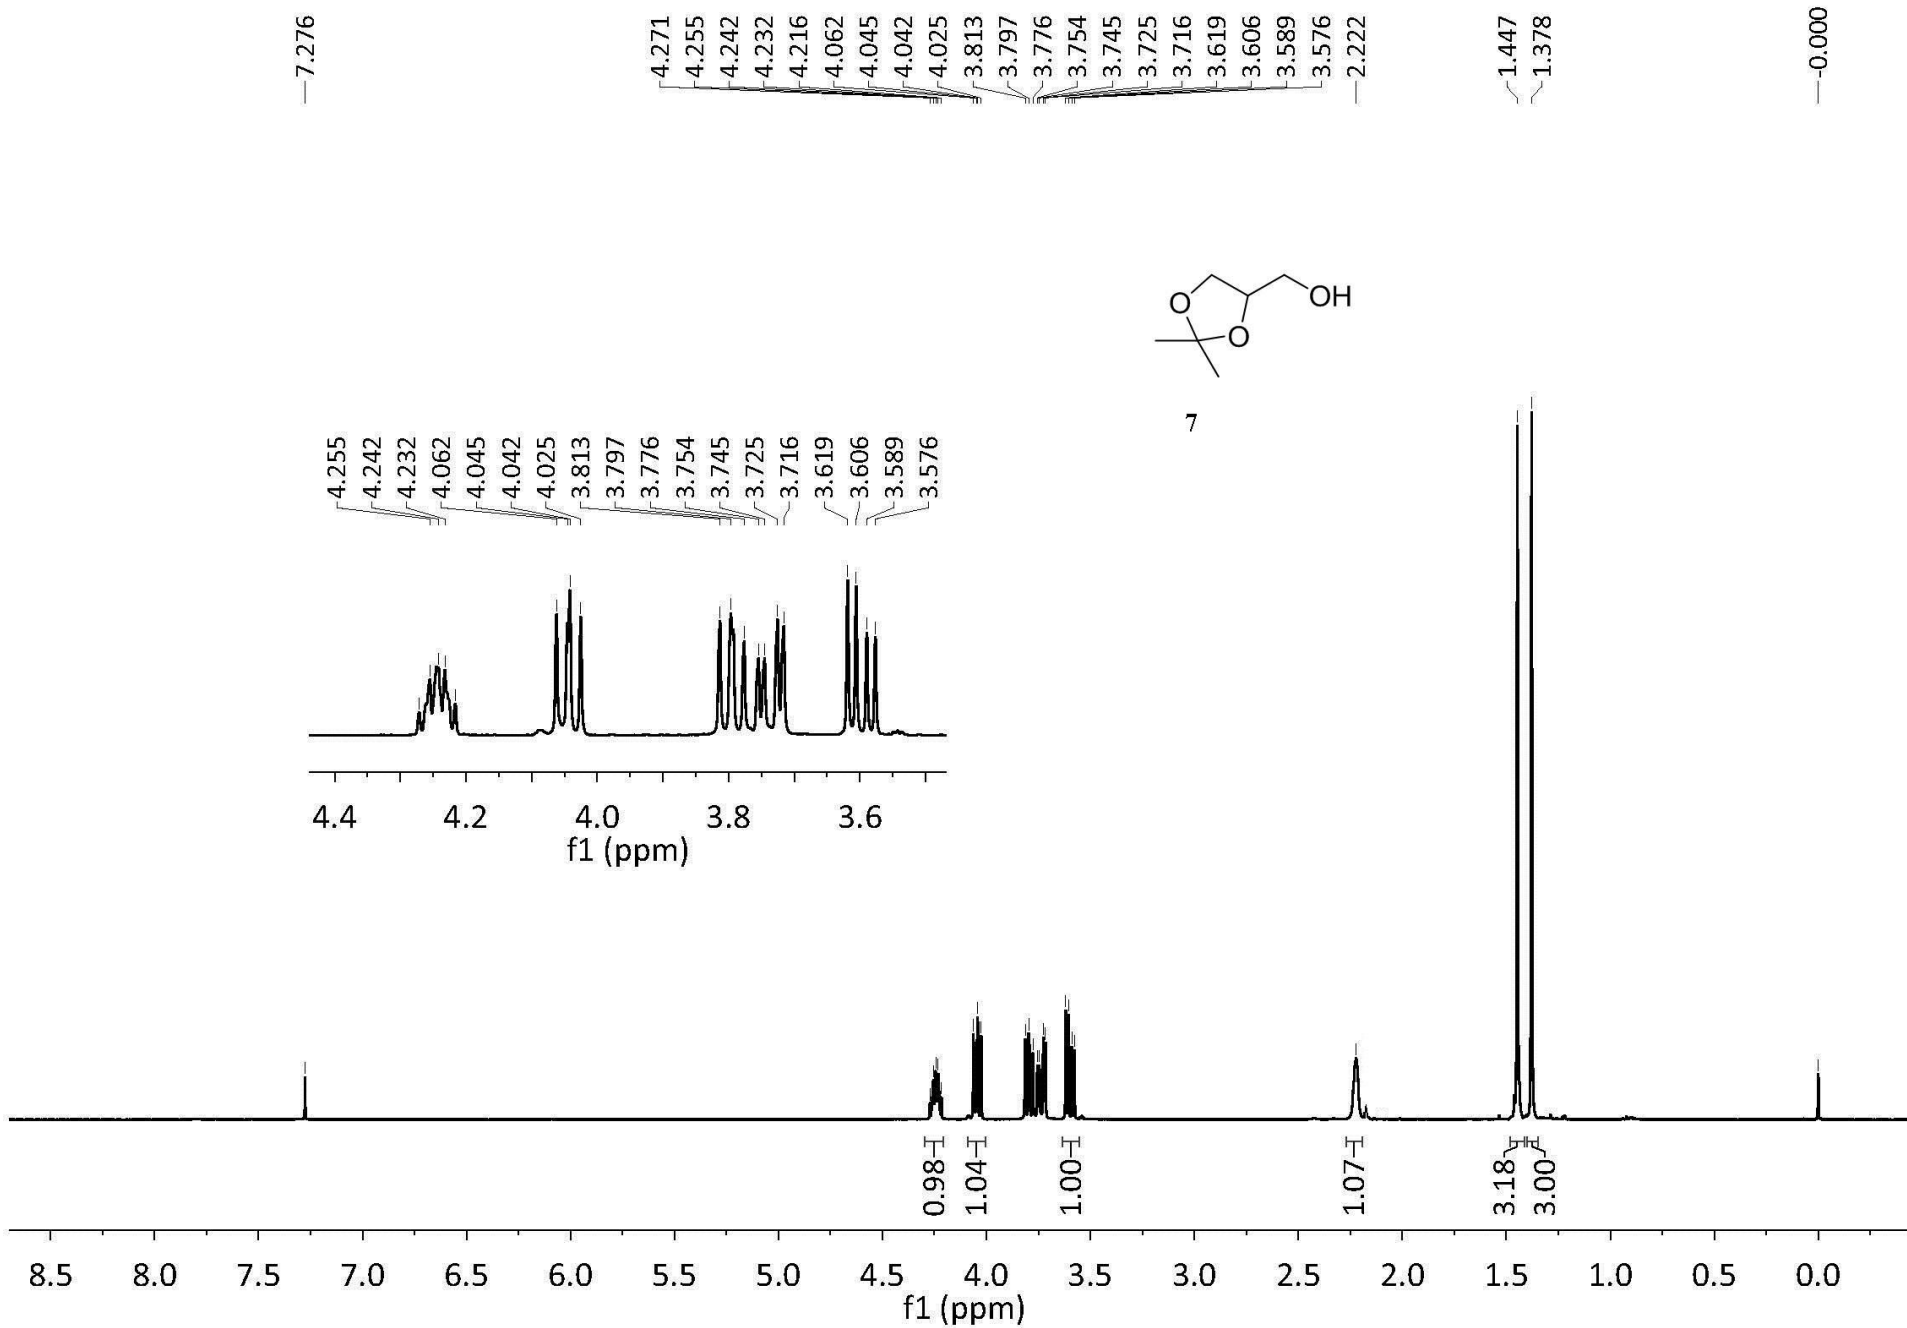

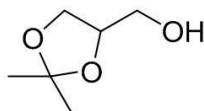

7

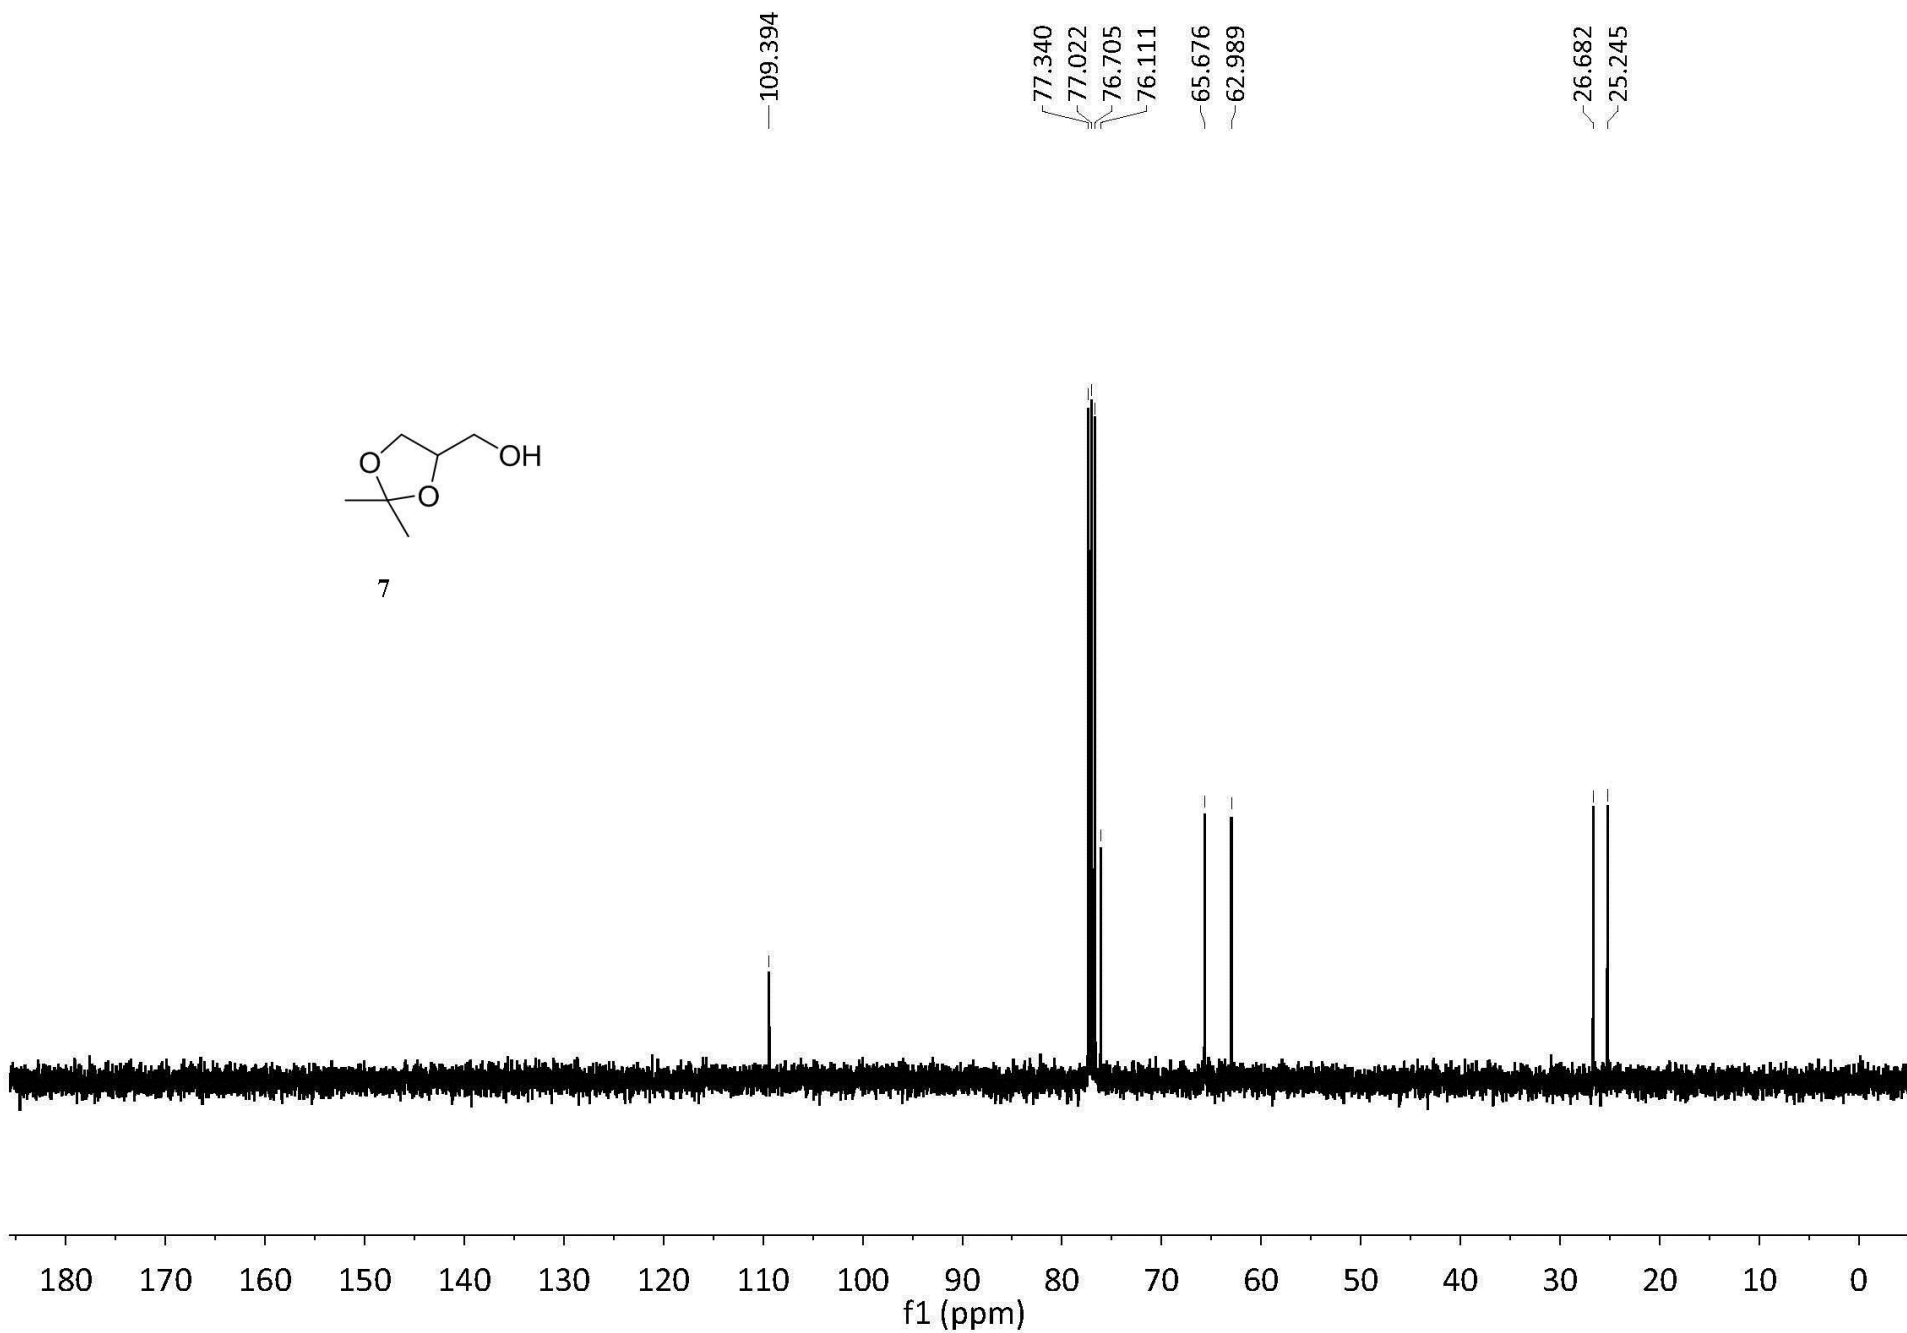

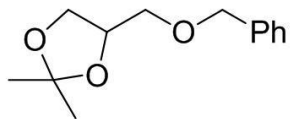

8

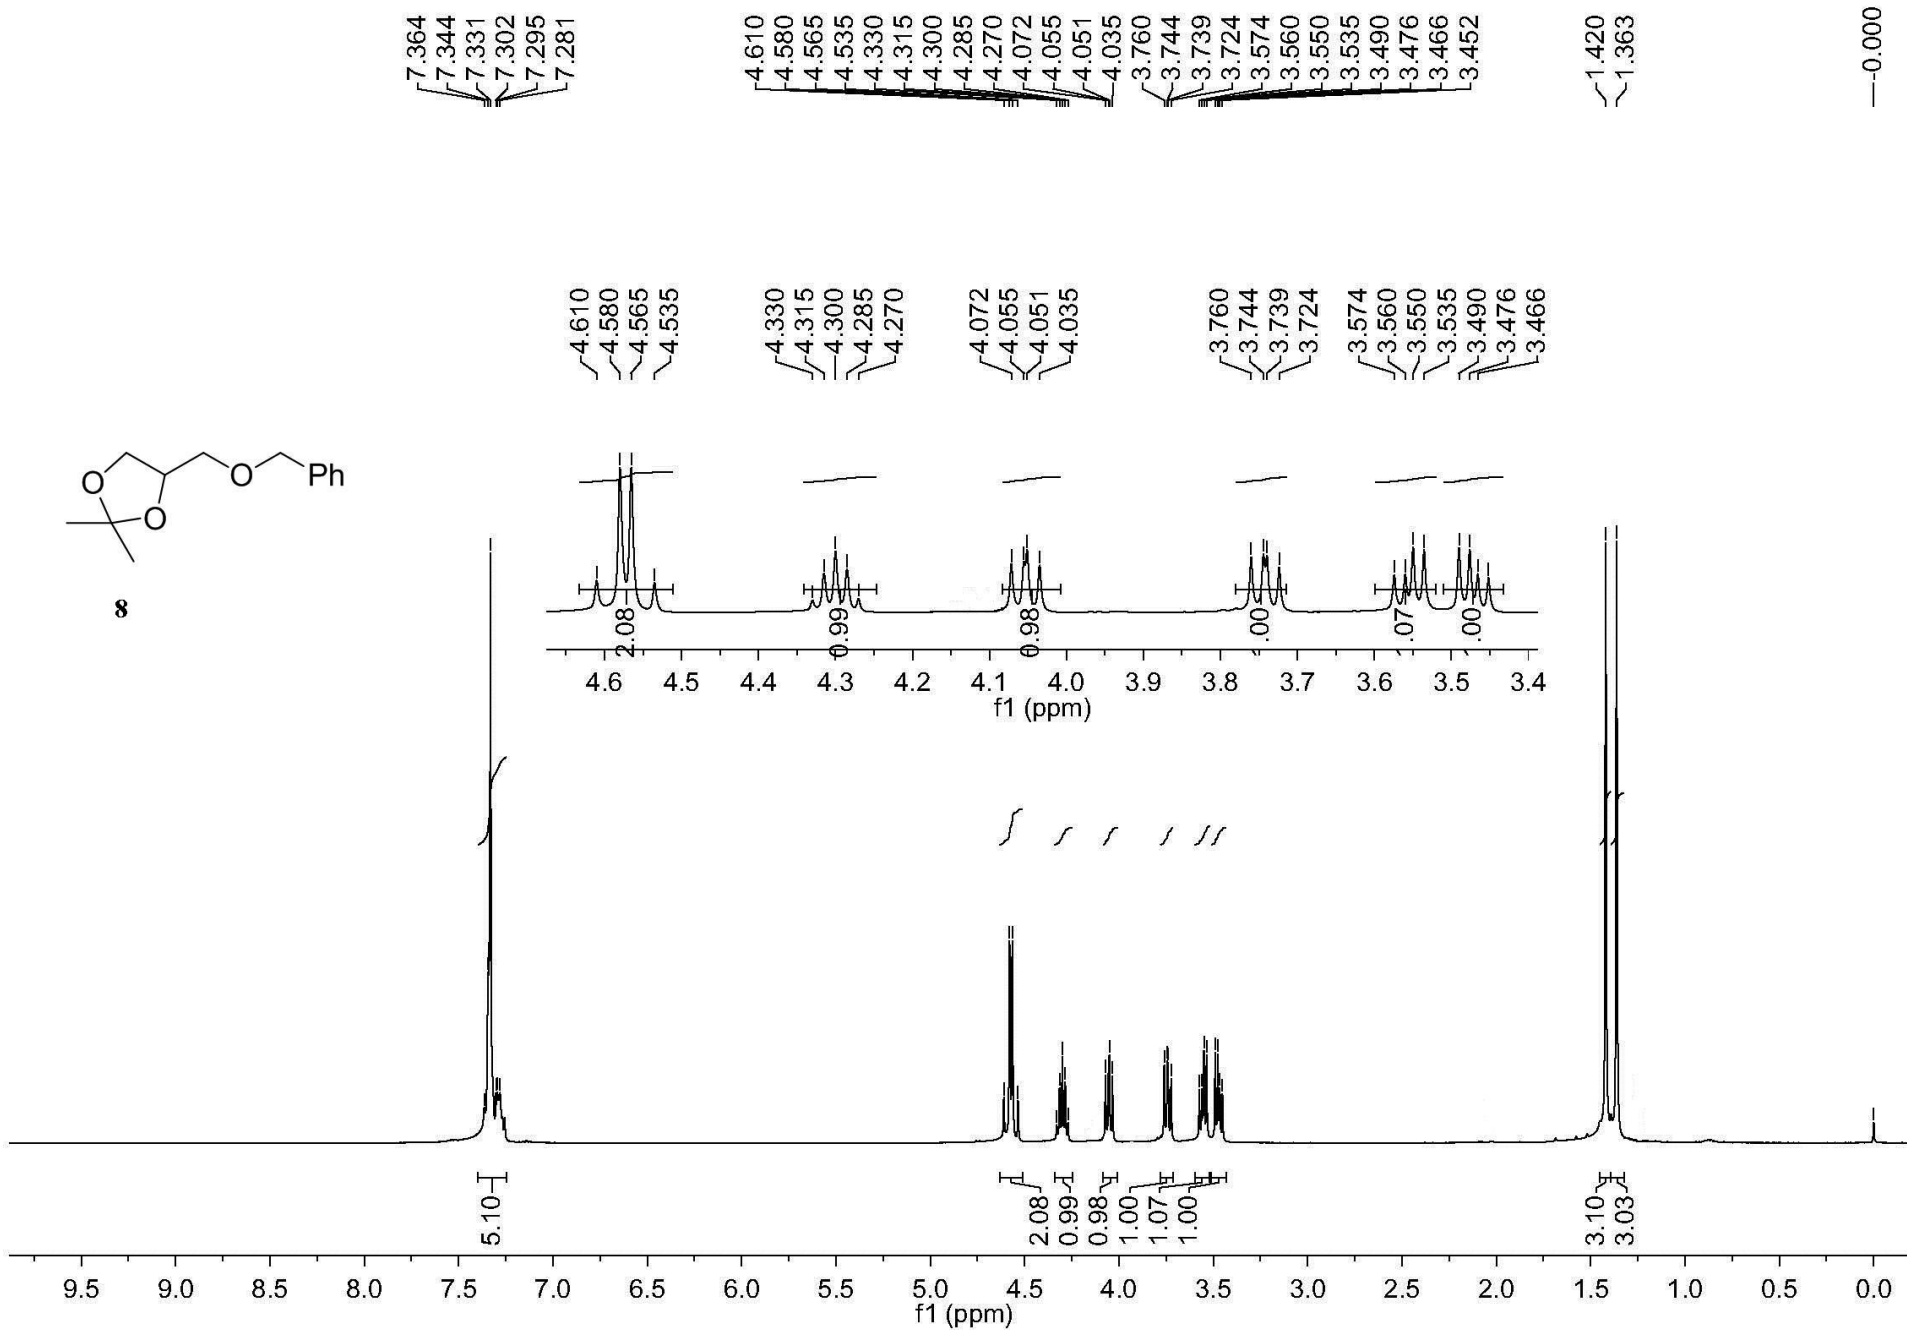



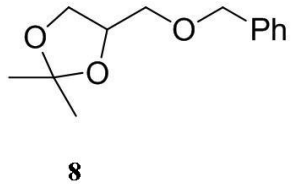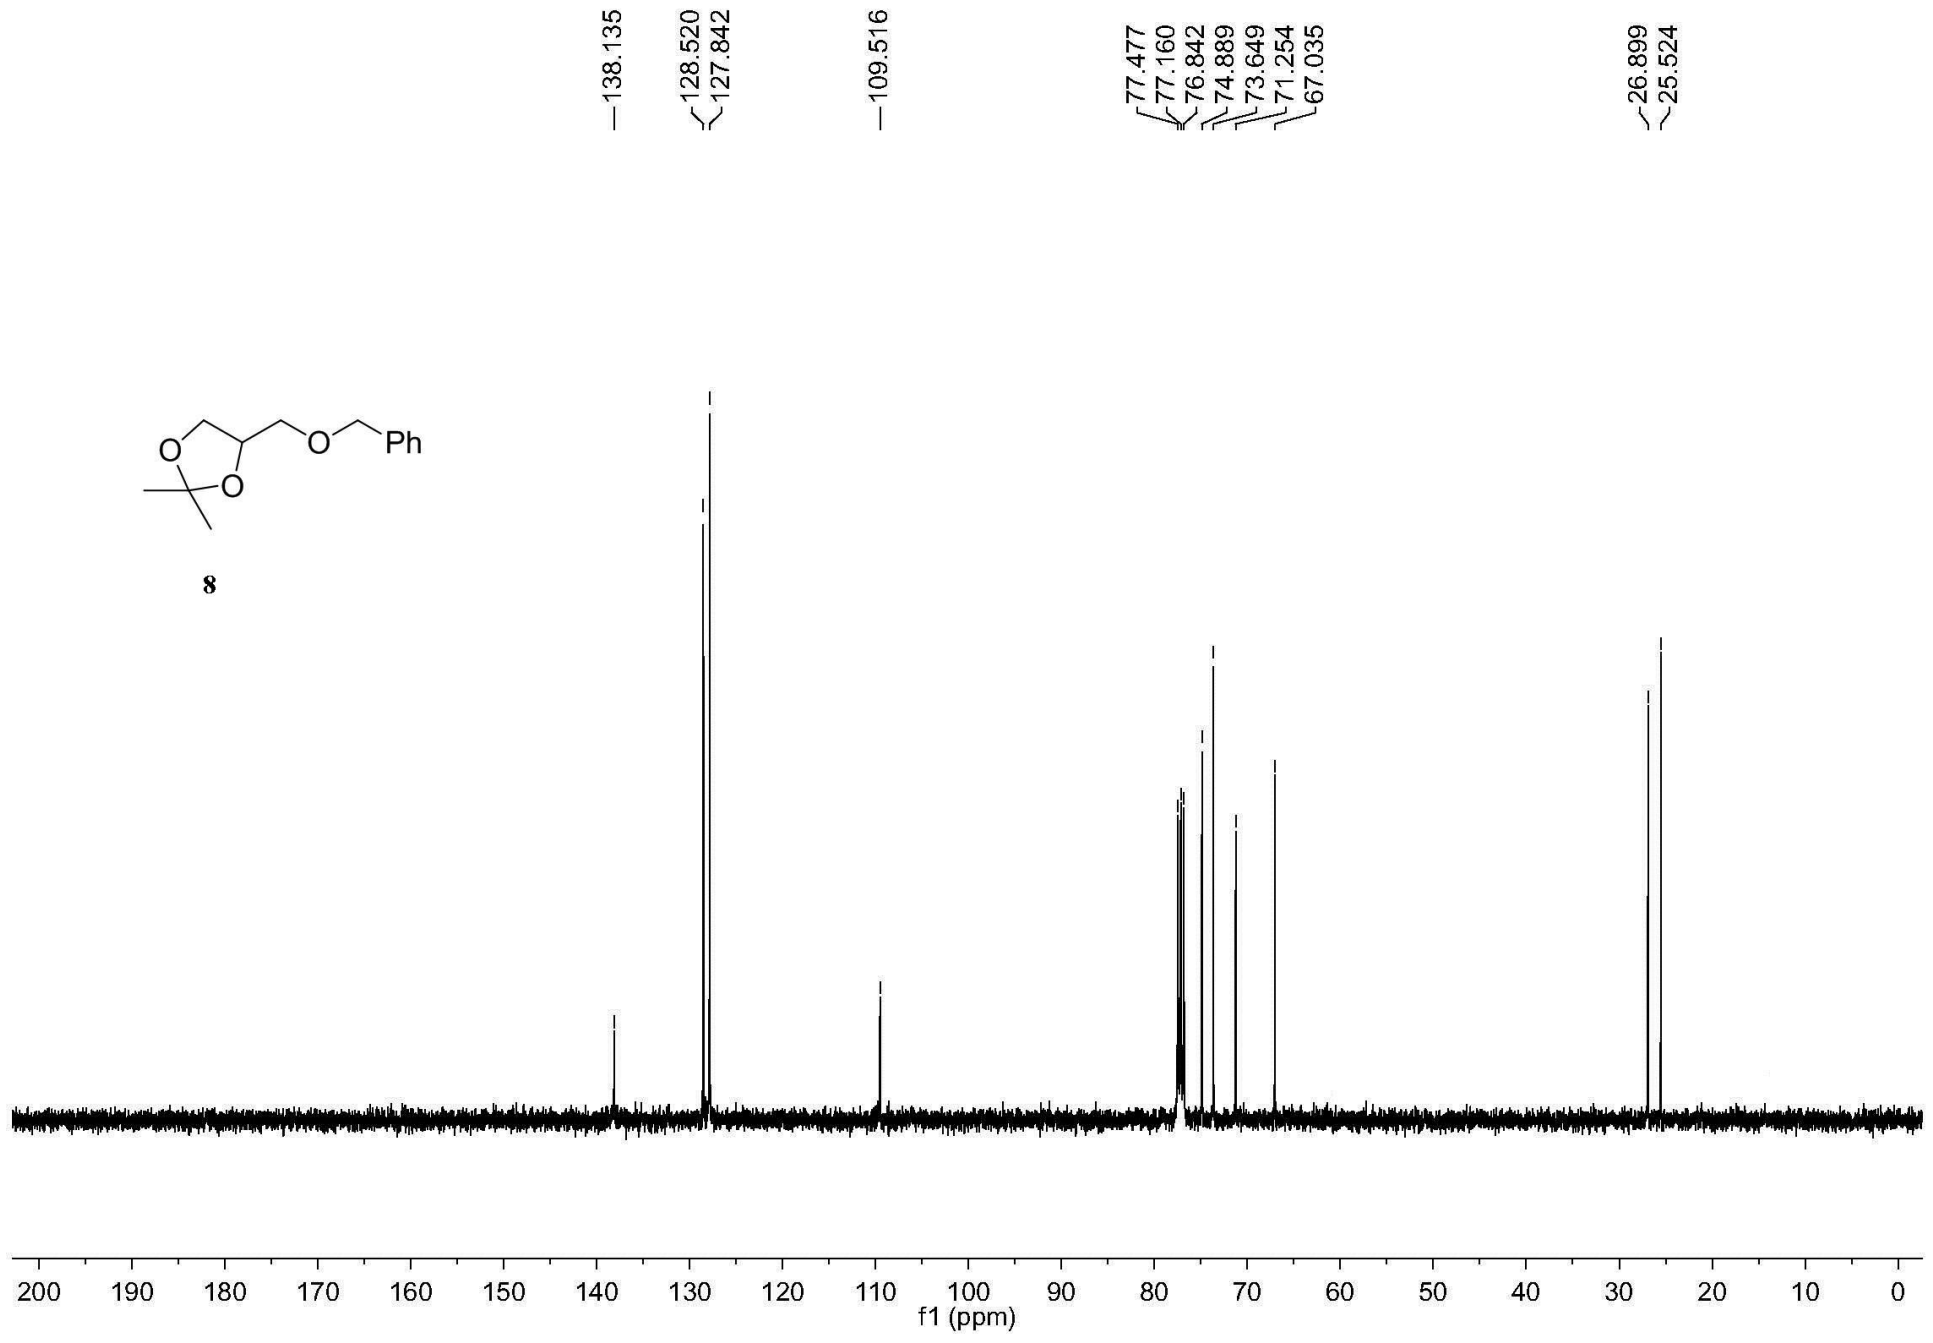

7.368  
7.349  
7.334  
7.320  
7.291  
7.281

4.483  
3.633  
3.626  
3.615  
3.469  
3.457  
3.440  
3.389  
3.362  
3.349  
3.341  
2.504

0.000

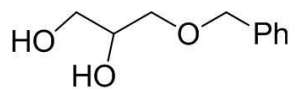

9

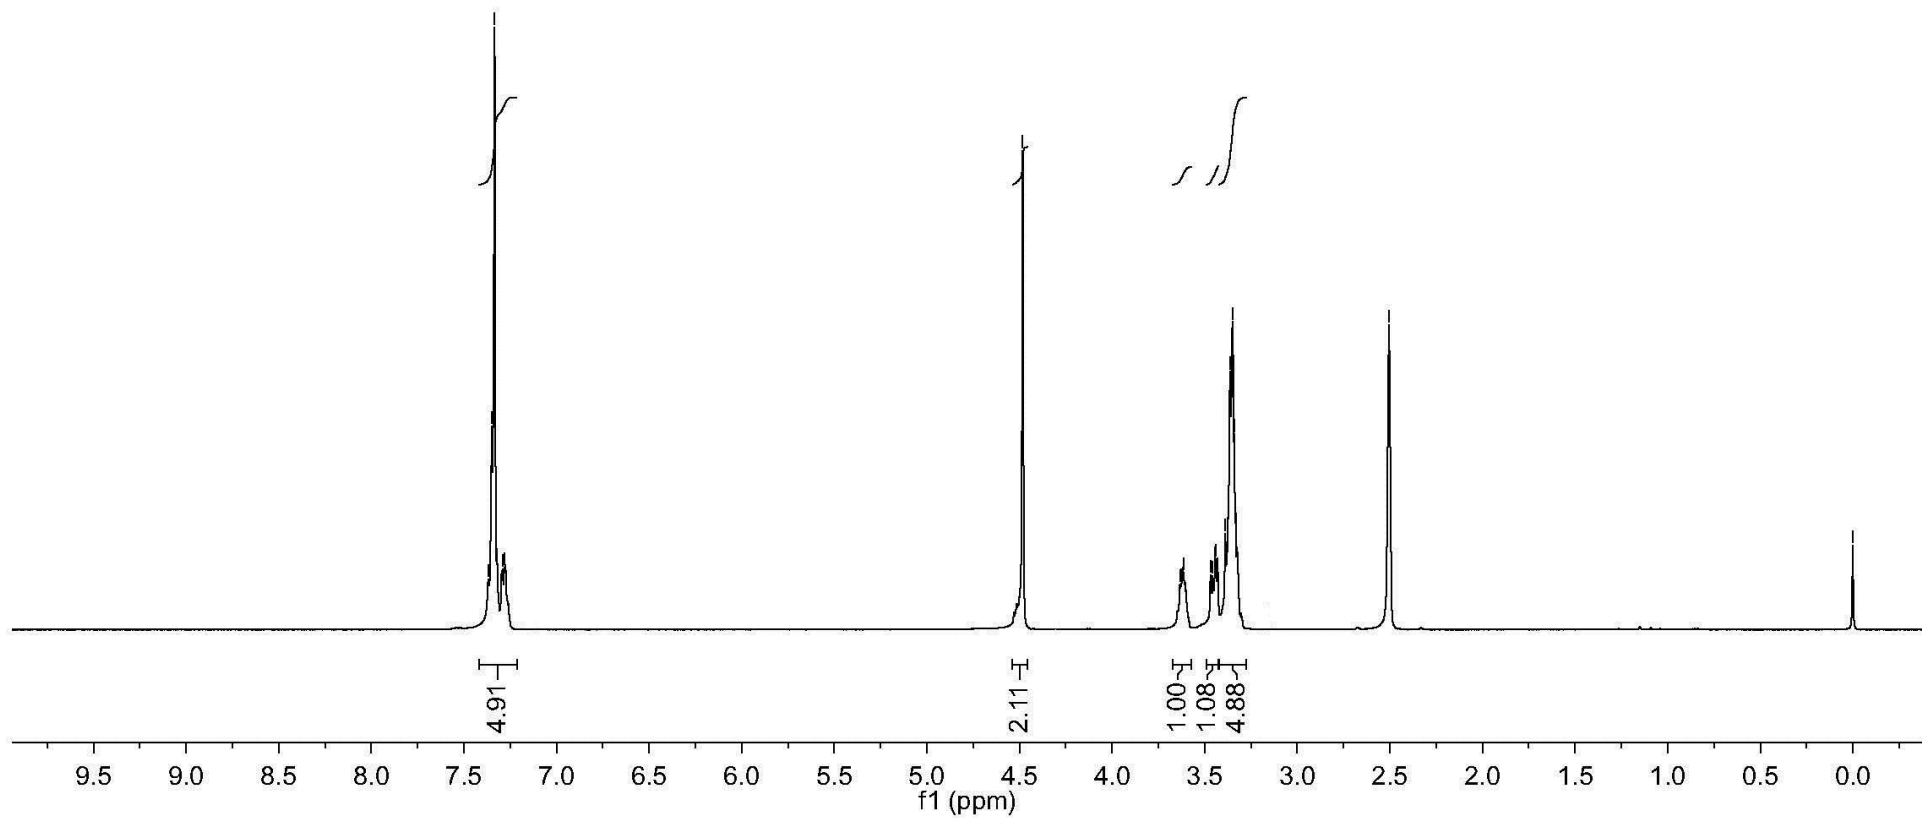

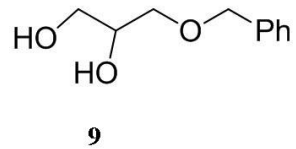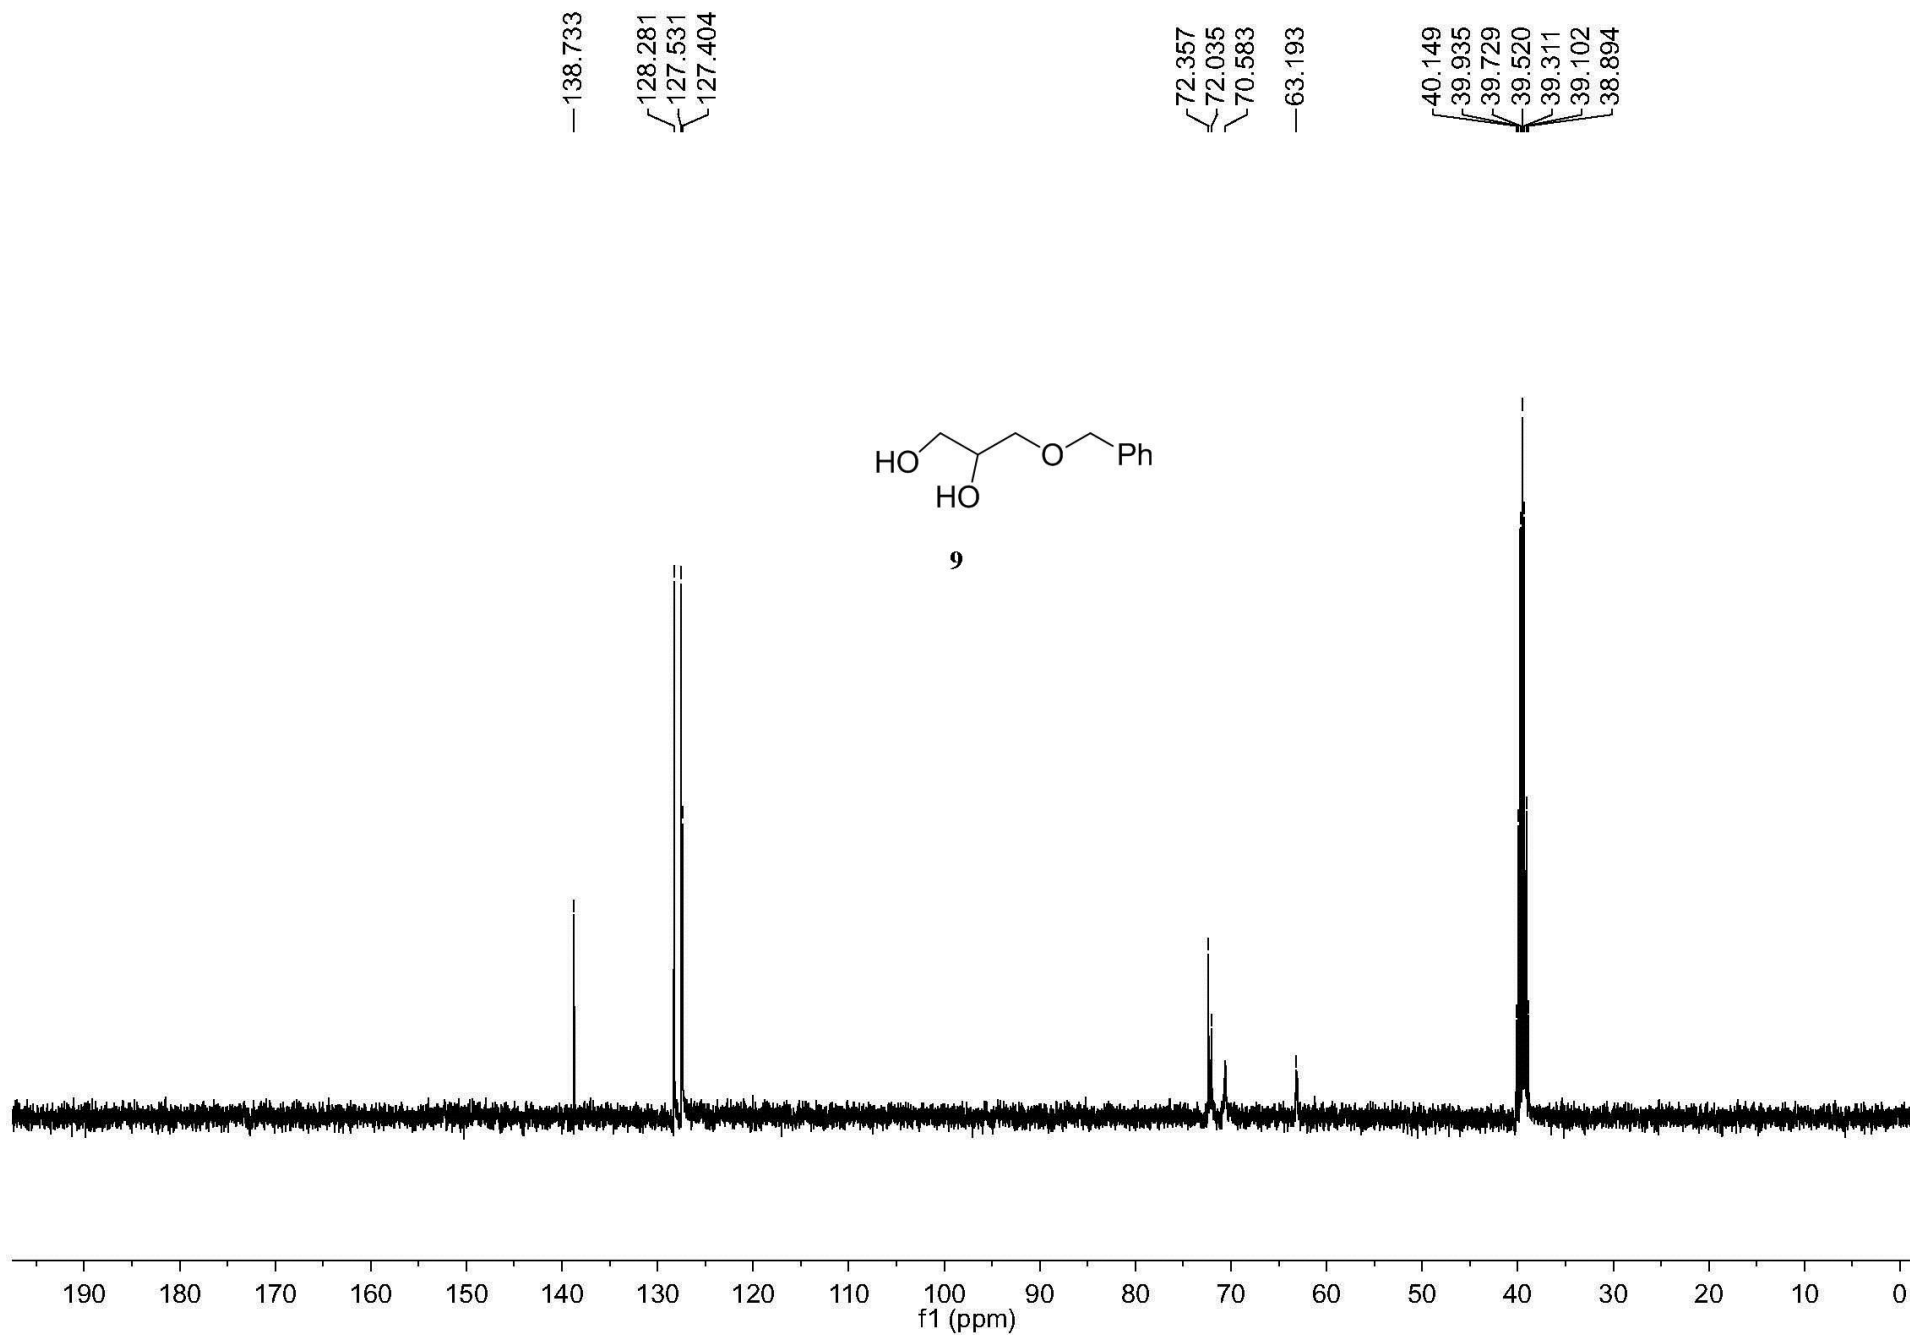

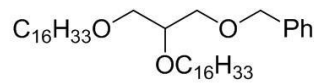

10

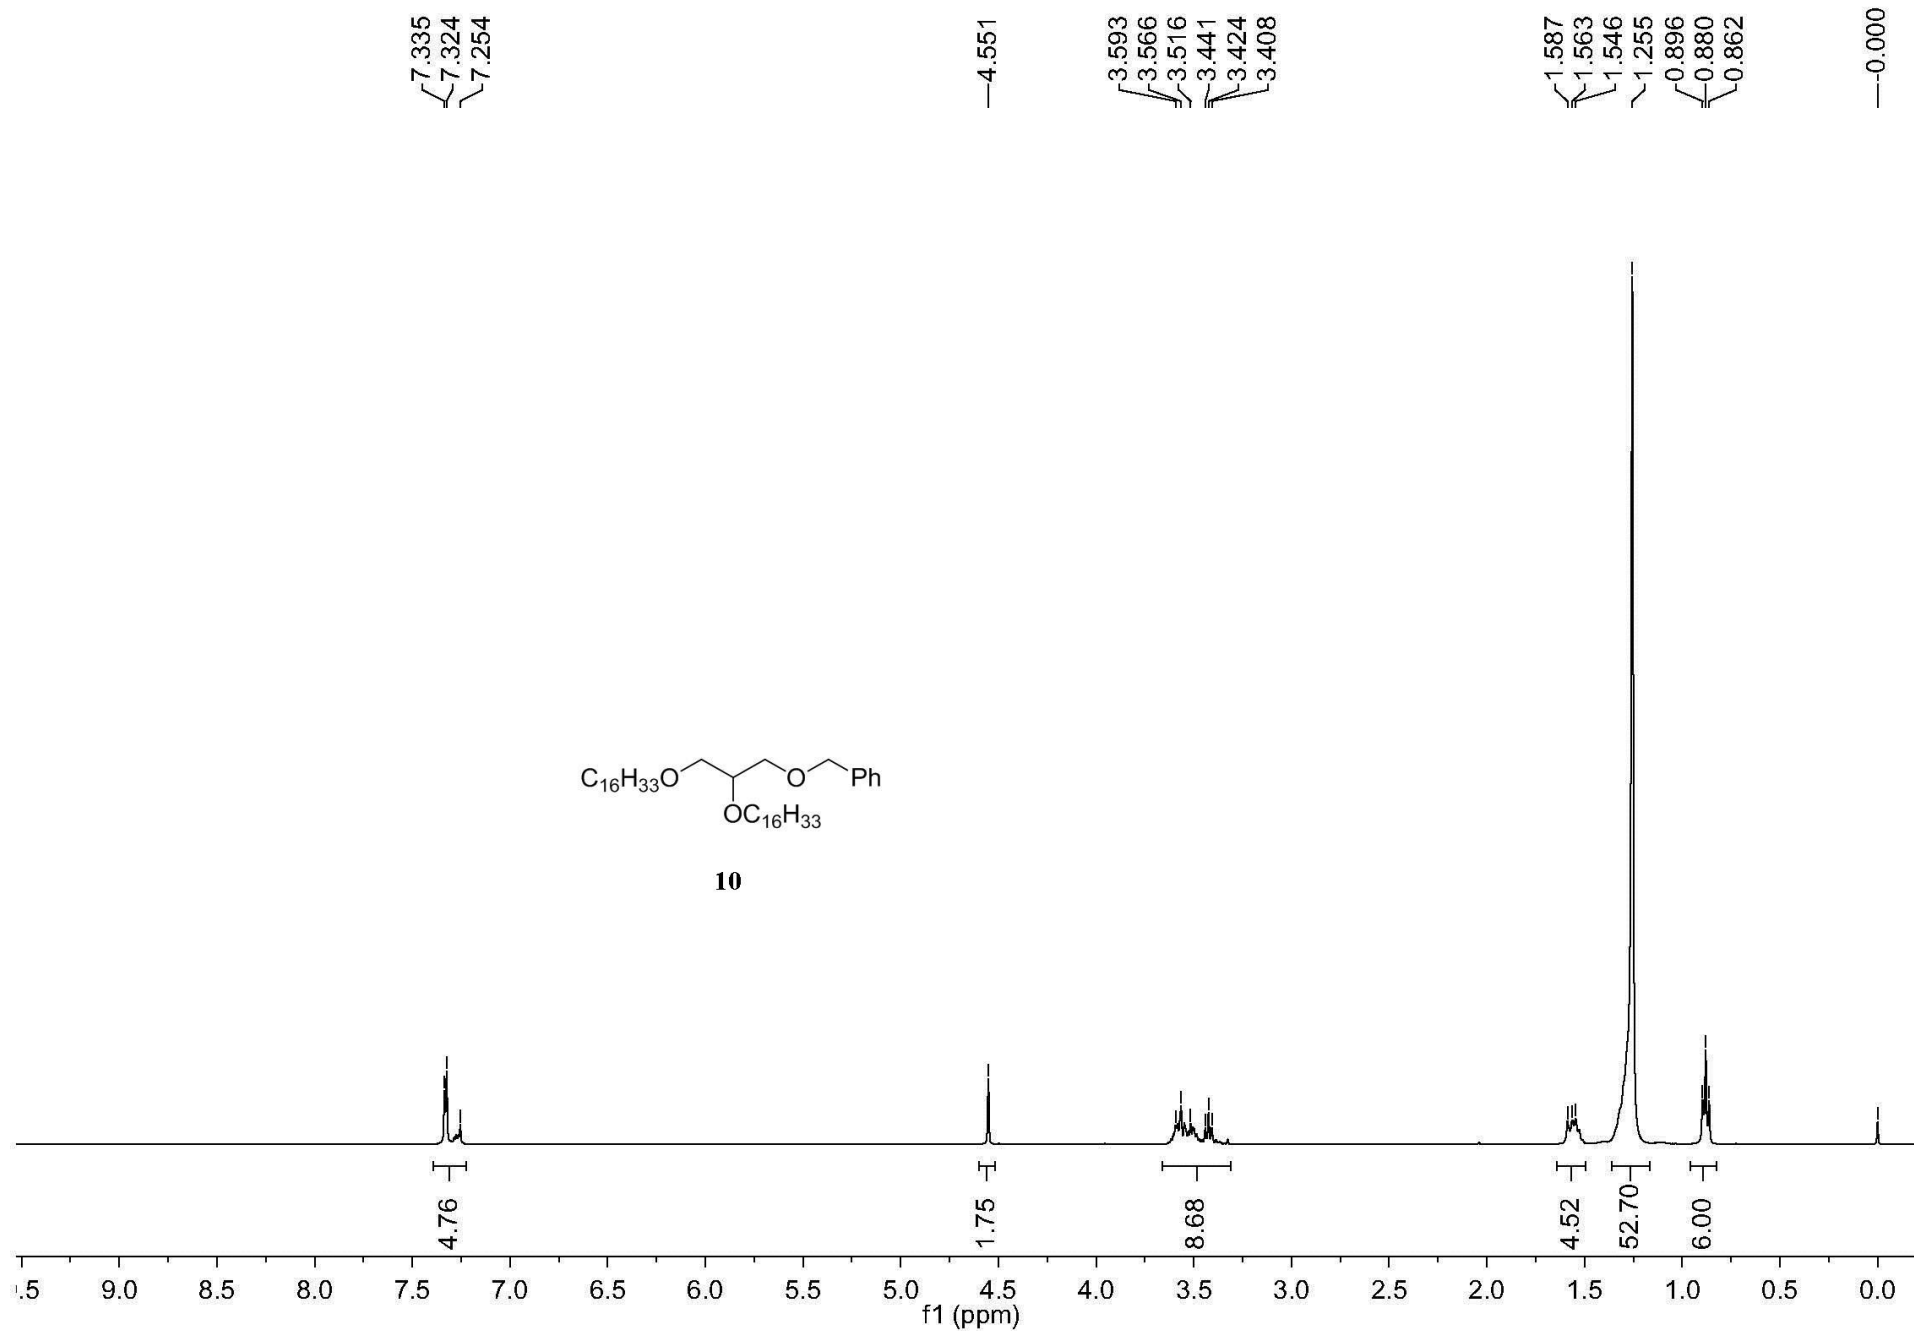

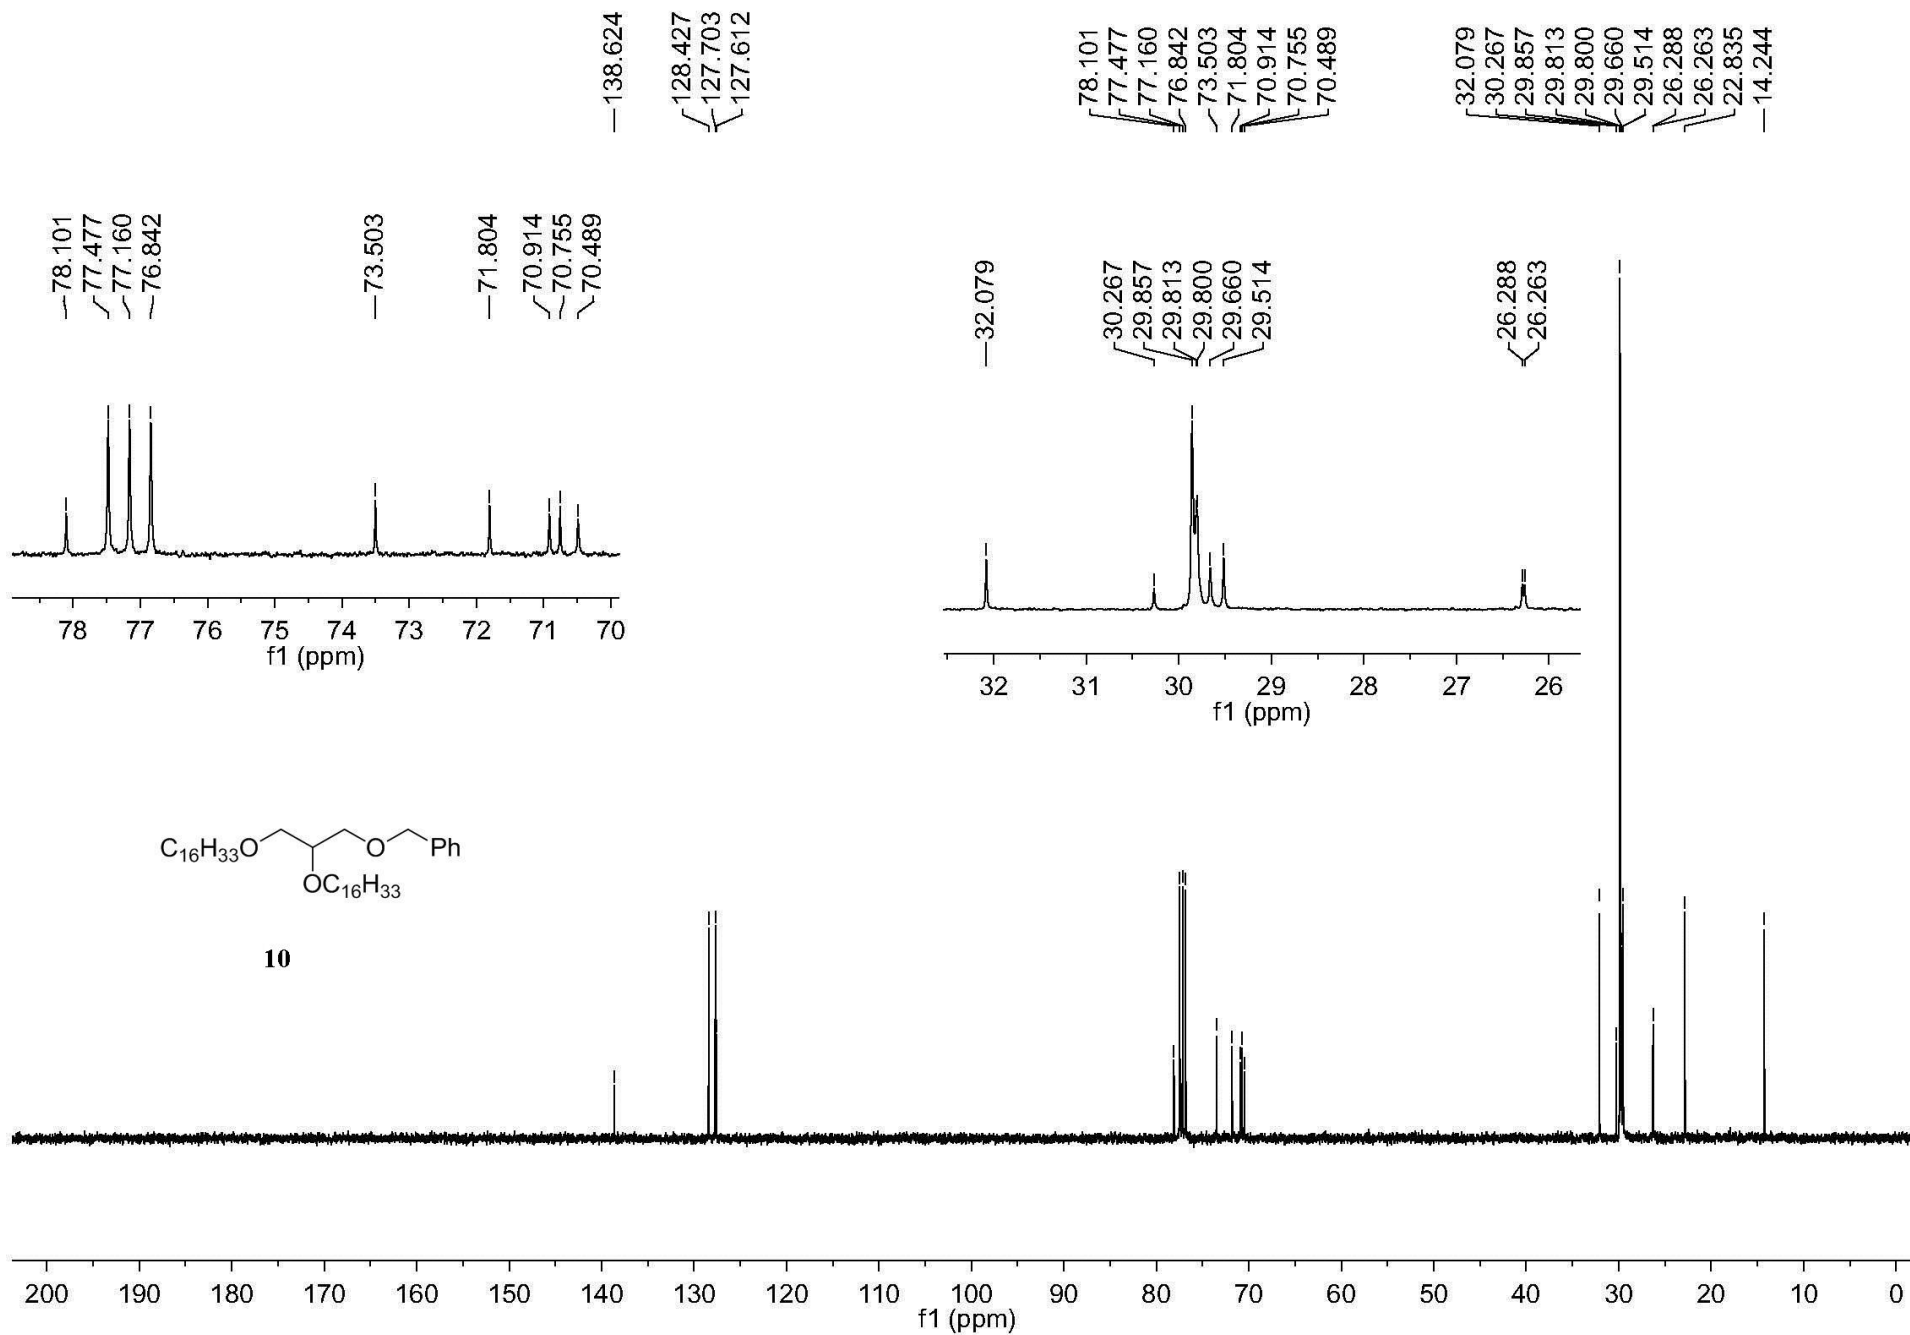

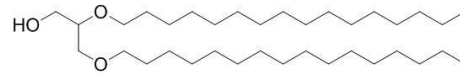

**11**

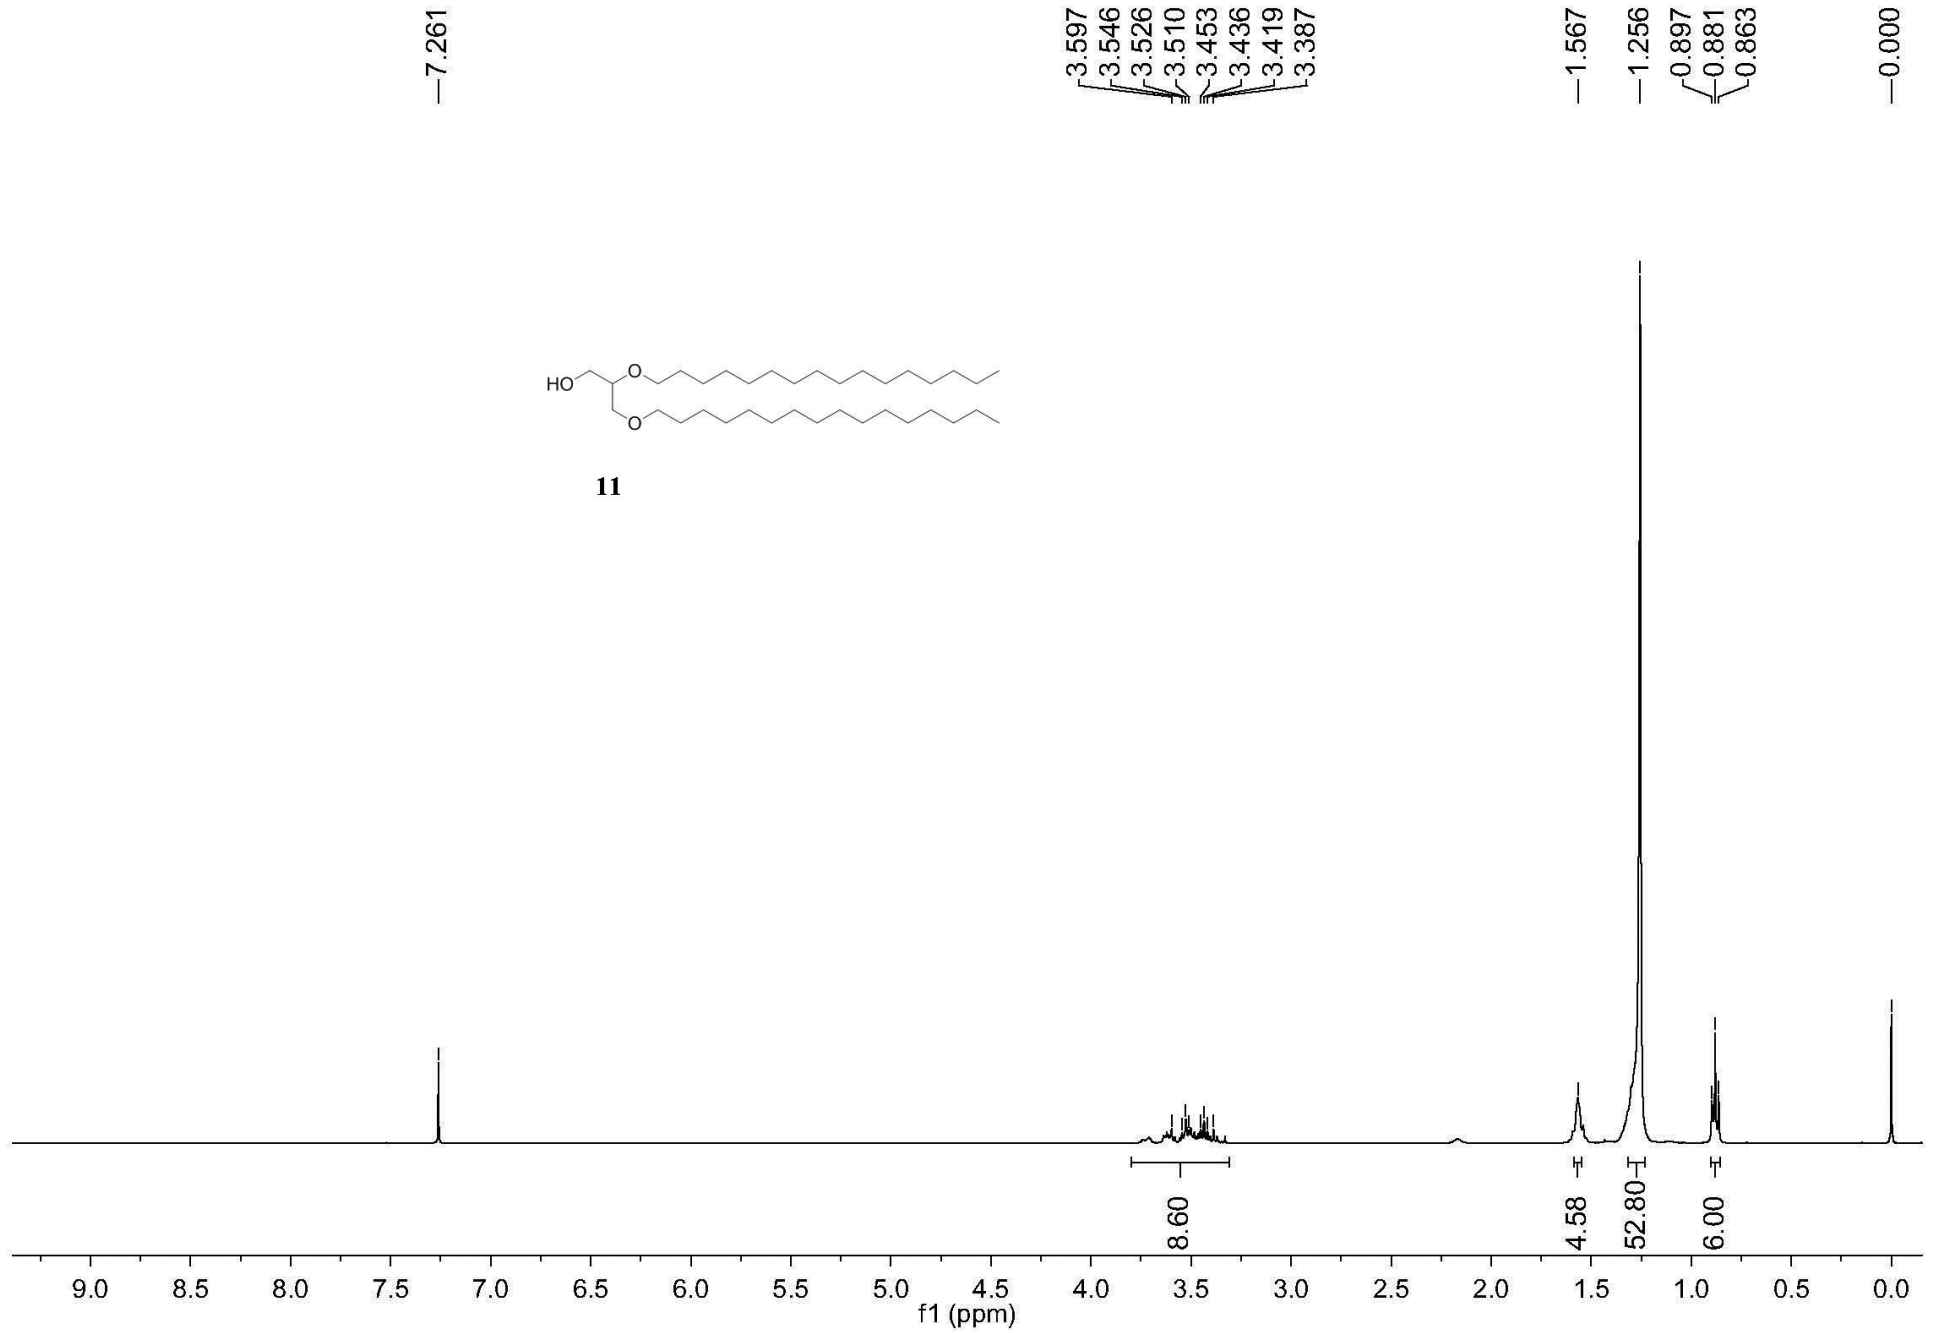

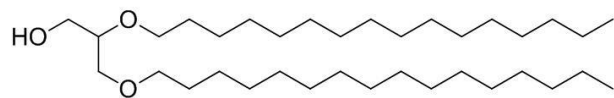

**11**

78.445  
77.477  
77.160  
76.843  
71.998  
71.076  
70.546  
63.246

32.076  
30.239  
29.849  
29.774  
29.623  
29.509  
26.255  
22.831  
14.238

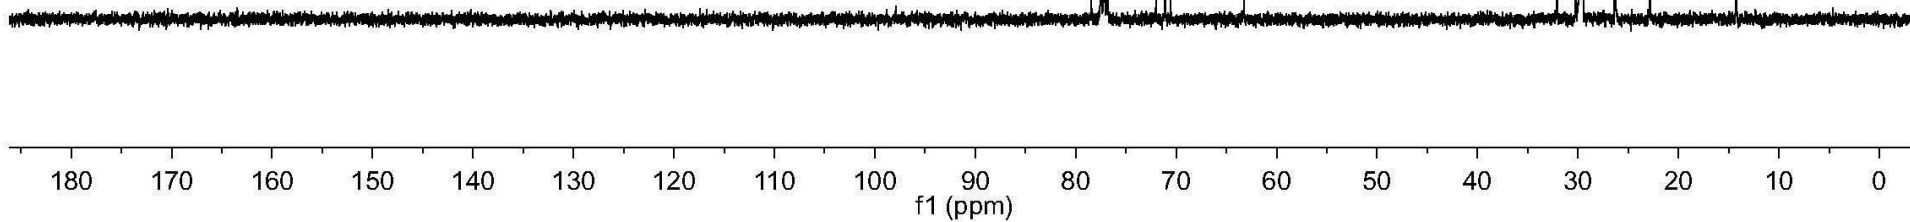

7.428  
7.410  
7.308  
7.290  
7.272  
7.244  
7.227  
7.209

3.841  
3.669  
3.643  
3.588  
3.574  
3.218  
3.198  
-2.739  
-2.345

-0.000

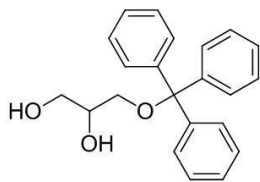

12

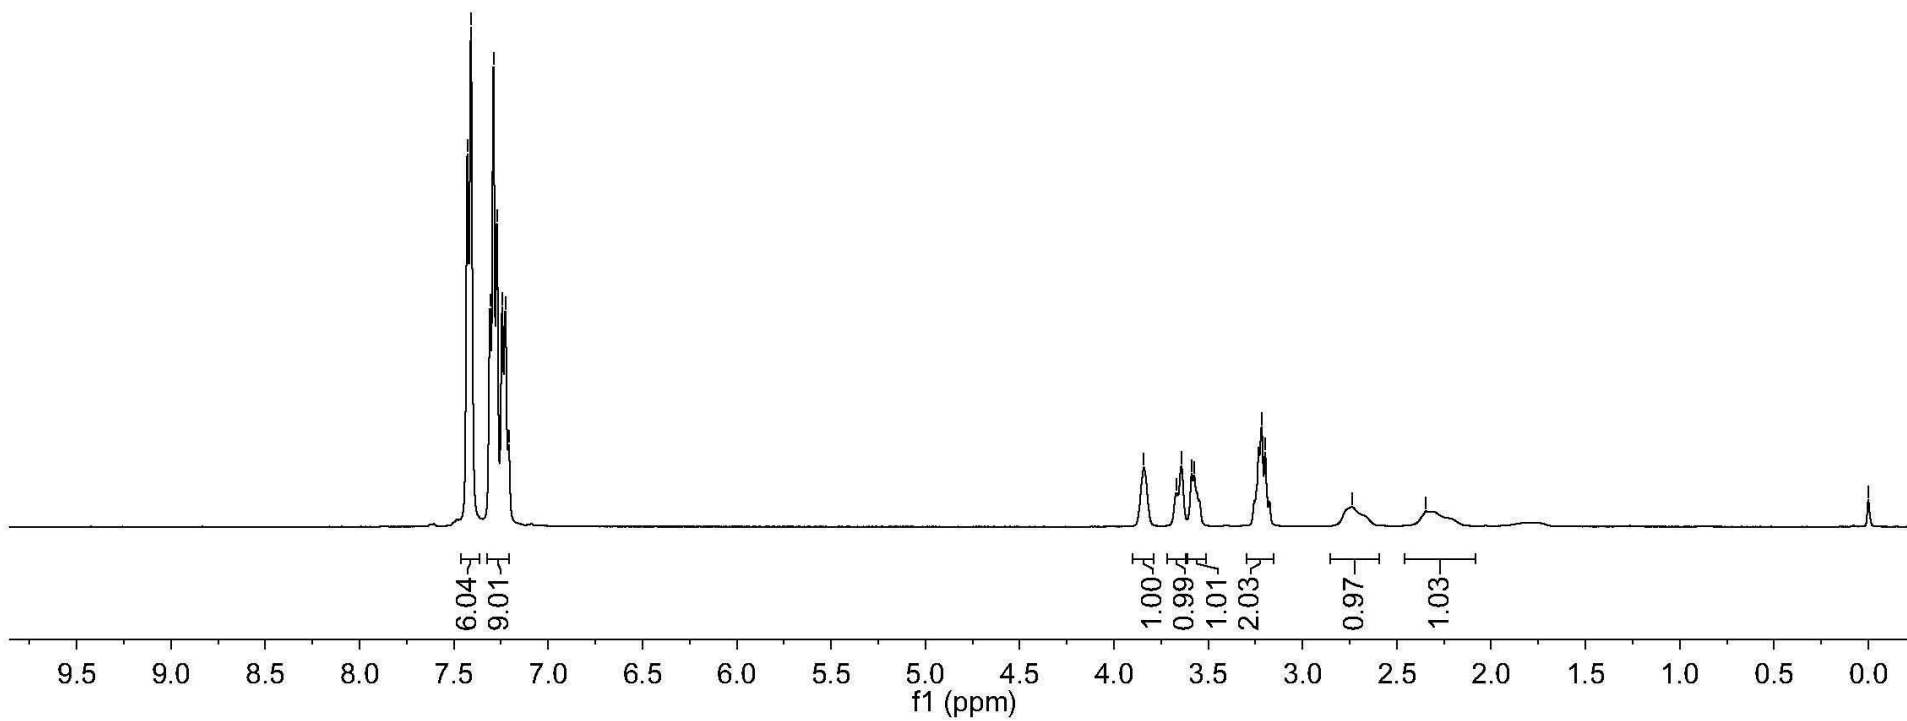



—143.760

└─128.725  
└─128.046  
└─127.309

—87.052

└─77.477  
└─77.160  
└─76.842  
└─71.269  
└─65.119  
└─64.394

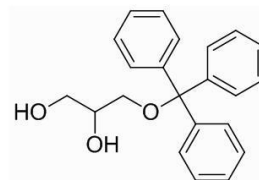

12

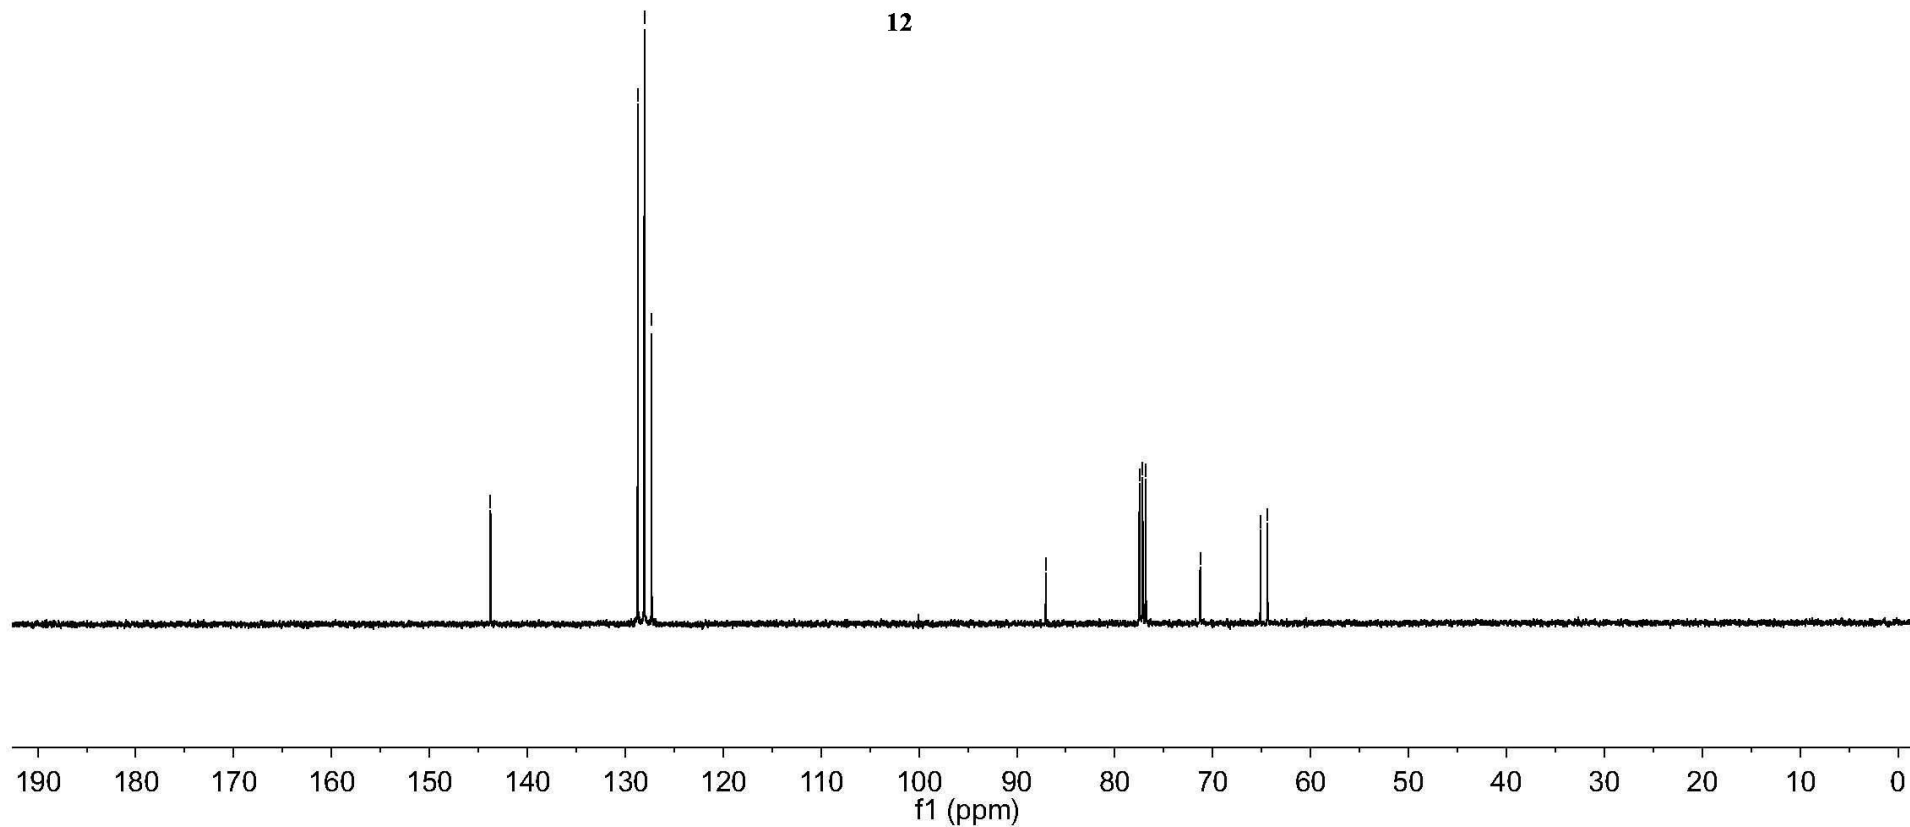

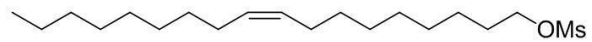

13

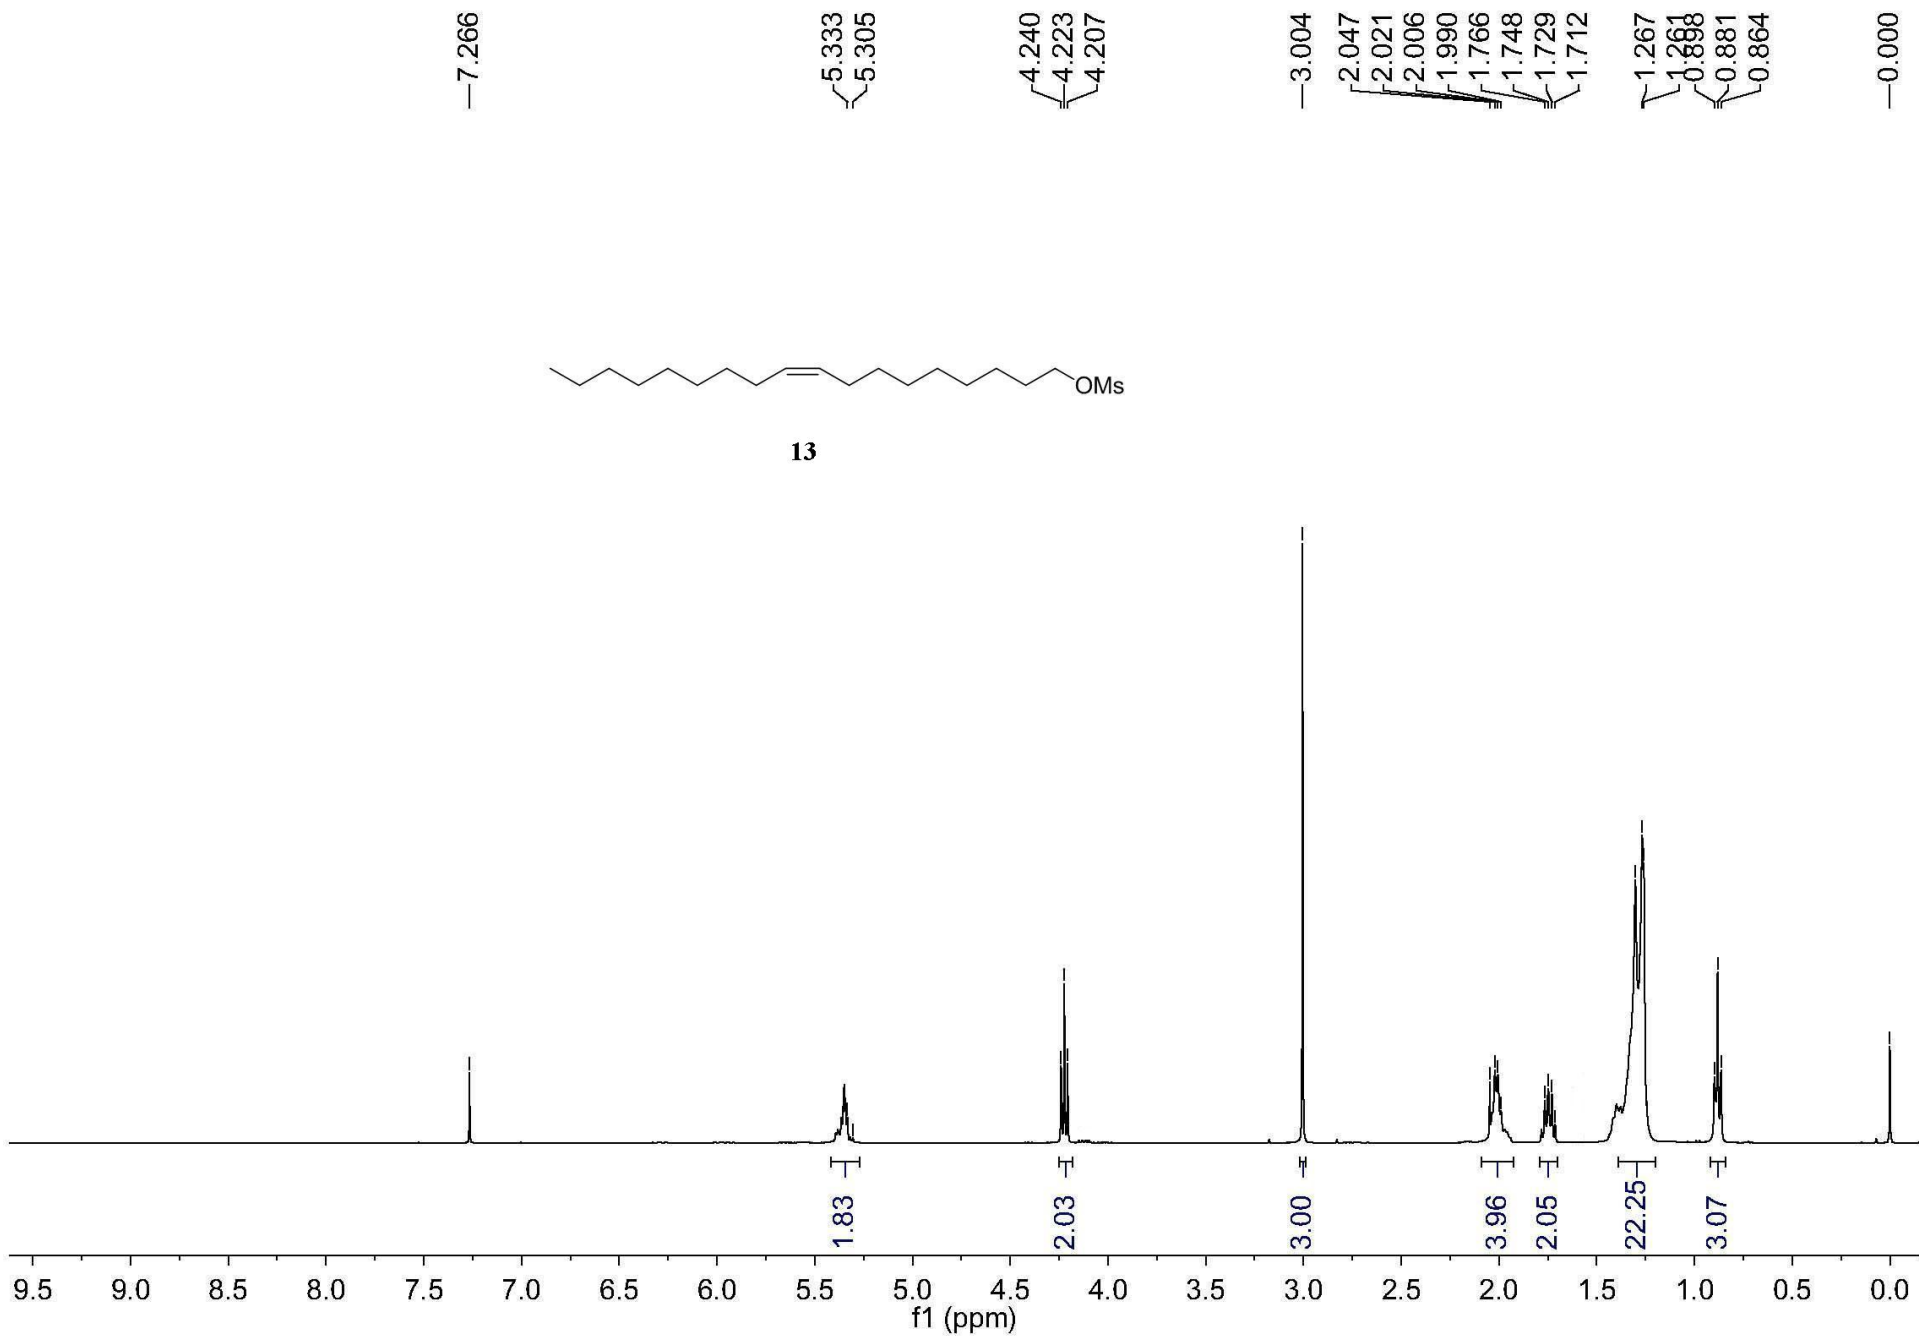

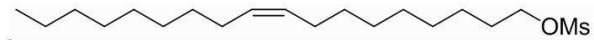

13

130.168  
129.859

77.477  
77.160  
76.842  
70.311

37.500  
32.042  
29.900  
29.834  
29.660  
29.459  
29.290  
29.260  
29.148  
27.355  
27.299  
25.553  
22.821  
14.254

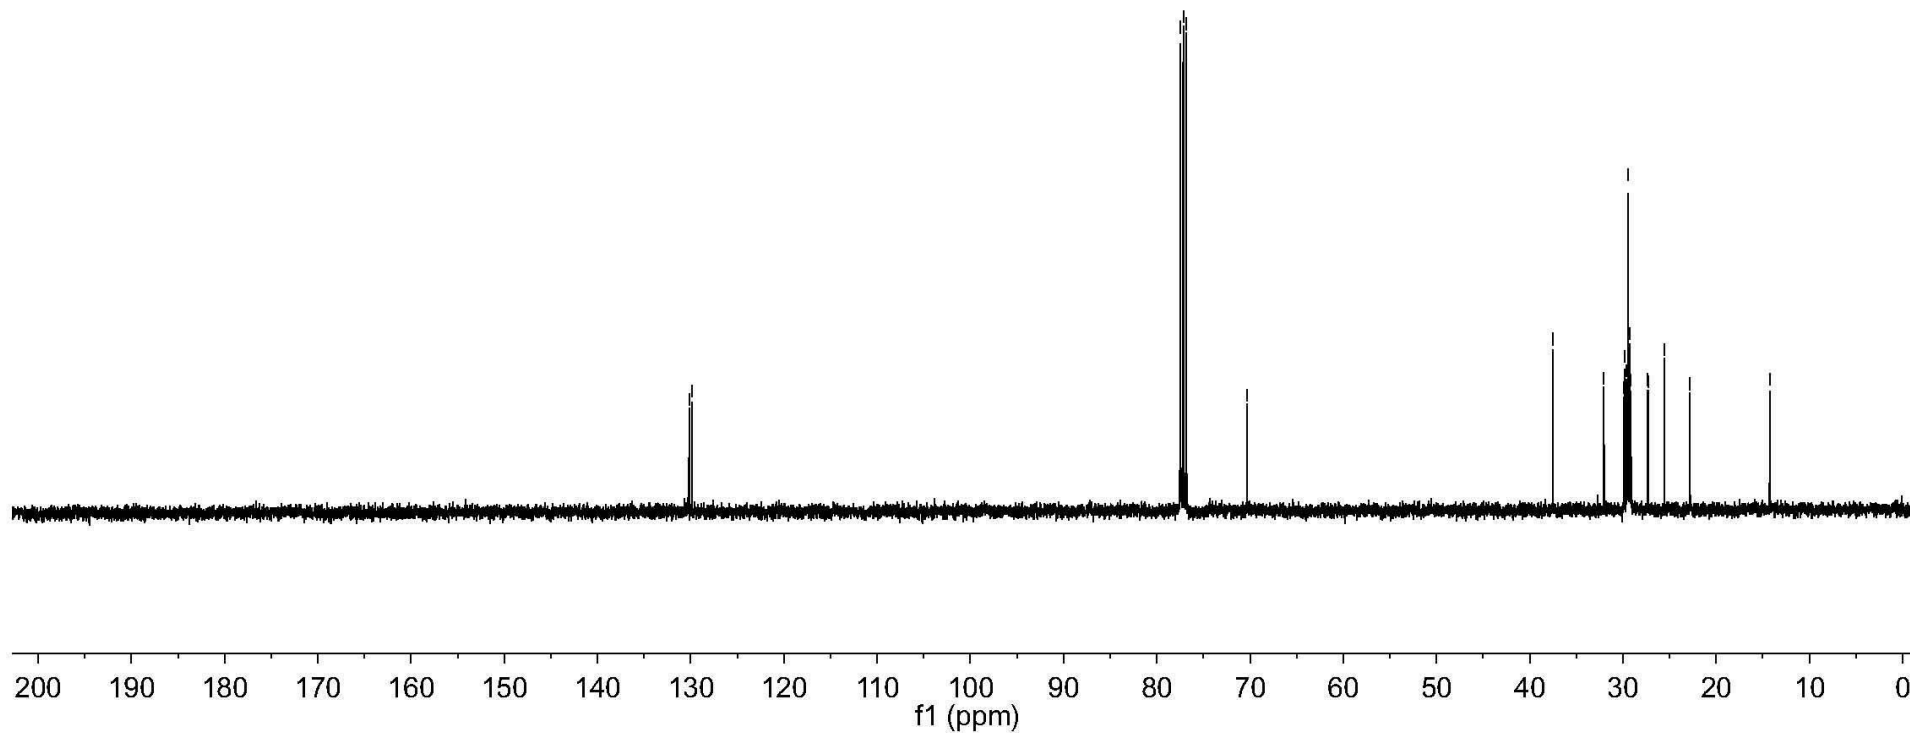

7.470  
7.451  
7.300  
7.282  
7.263  
7.235  
7.216

5.347

3.552  
3.530  
3.511  
3.411  
3.395  
3.379  
3.168

2.017  
2.005

1.561  
1.504  
1.264

0.893  
0.878  
0.862

0.000

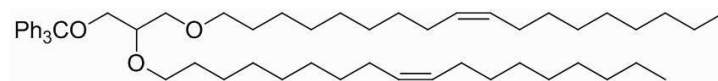

14

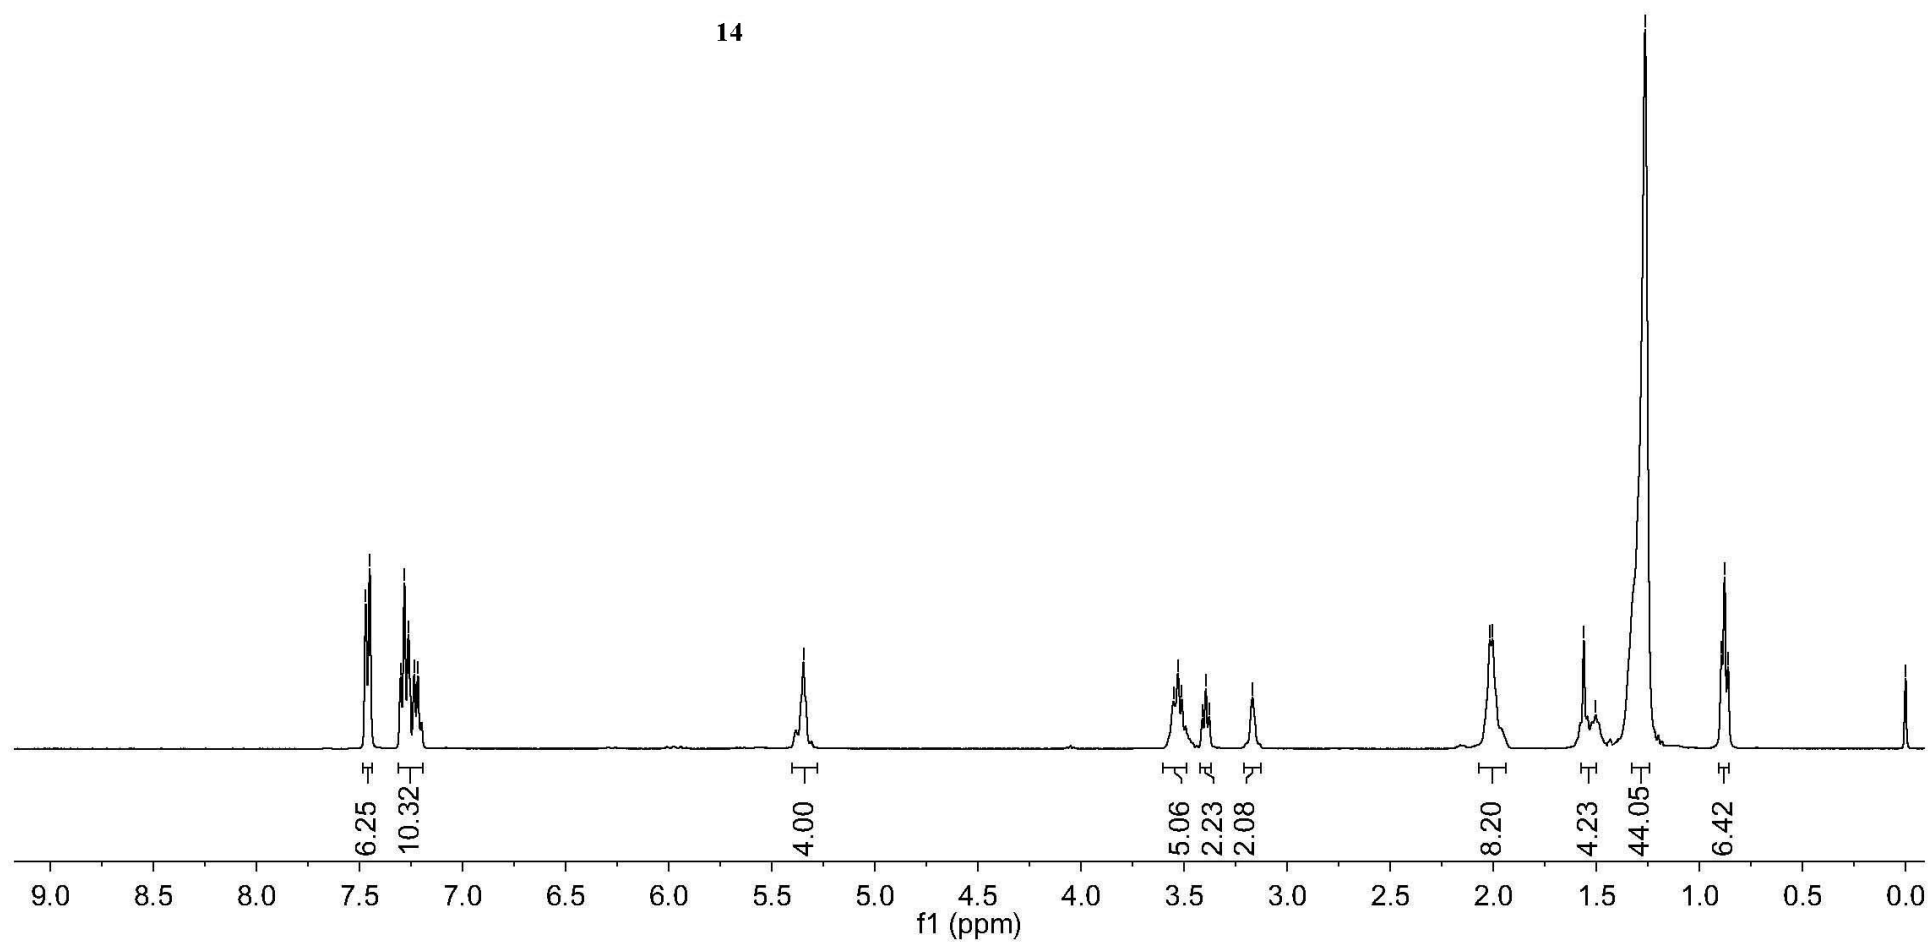

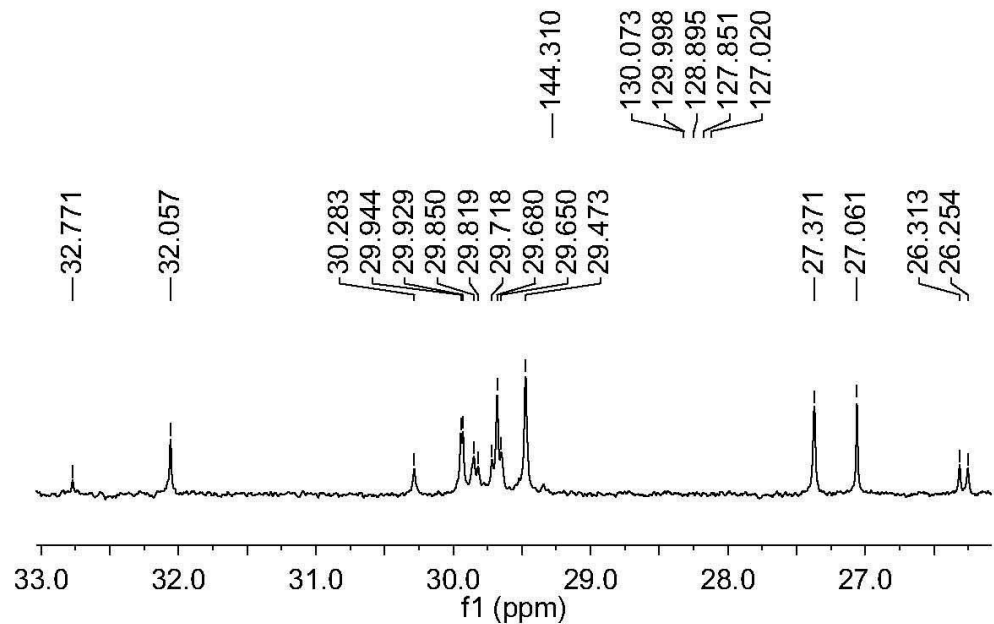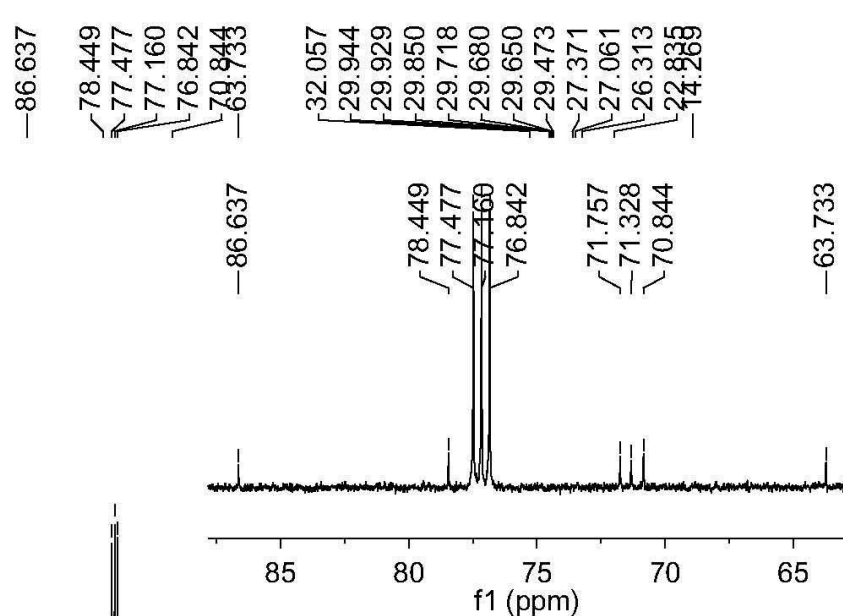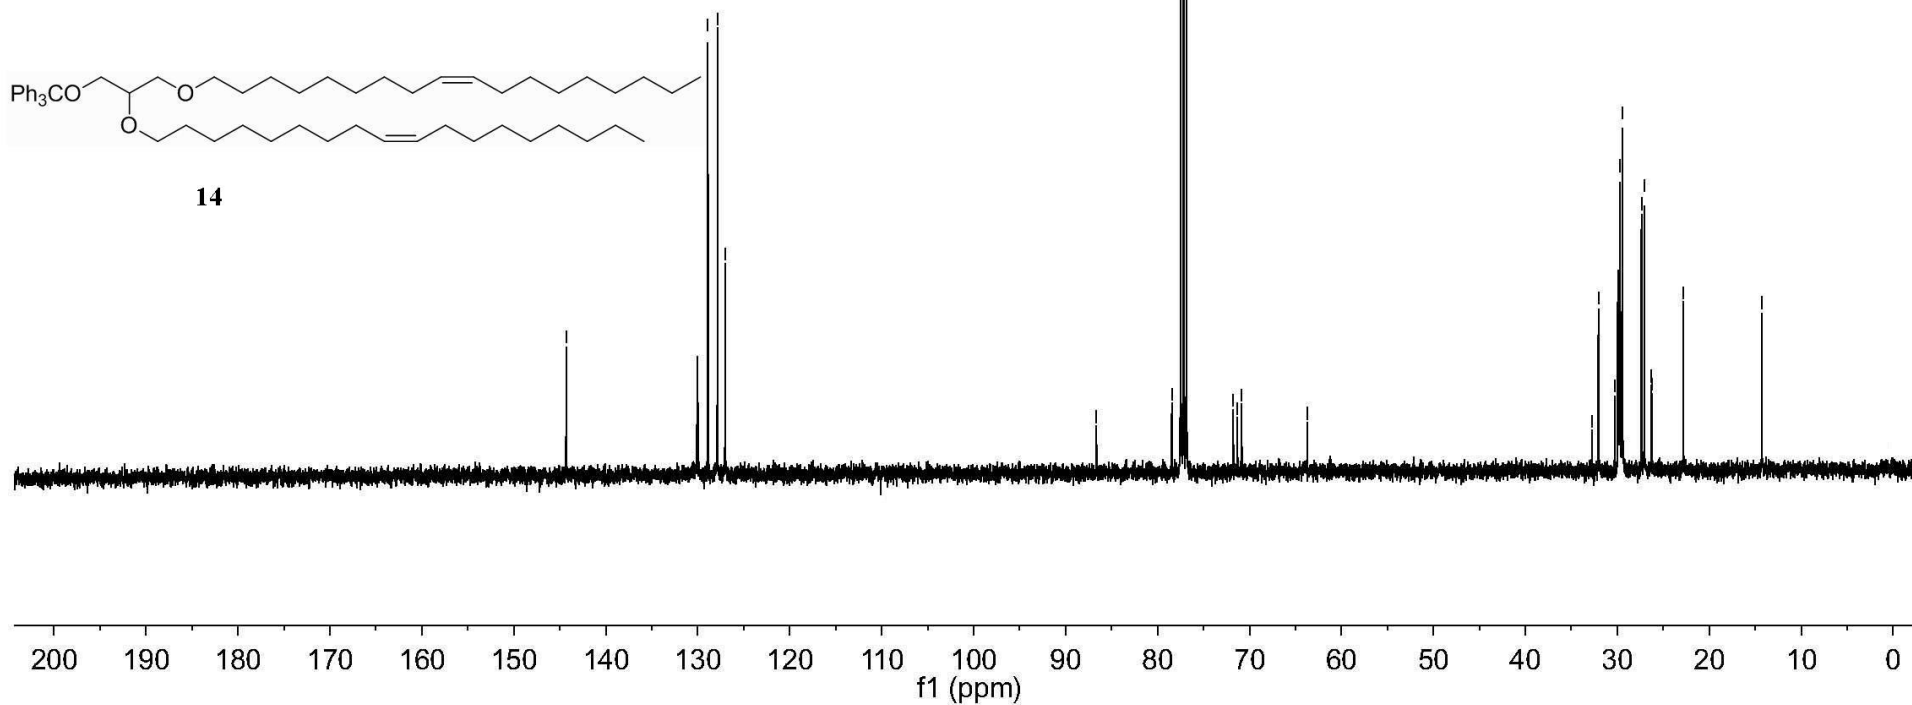

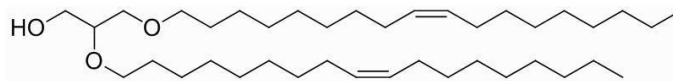

15

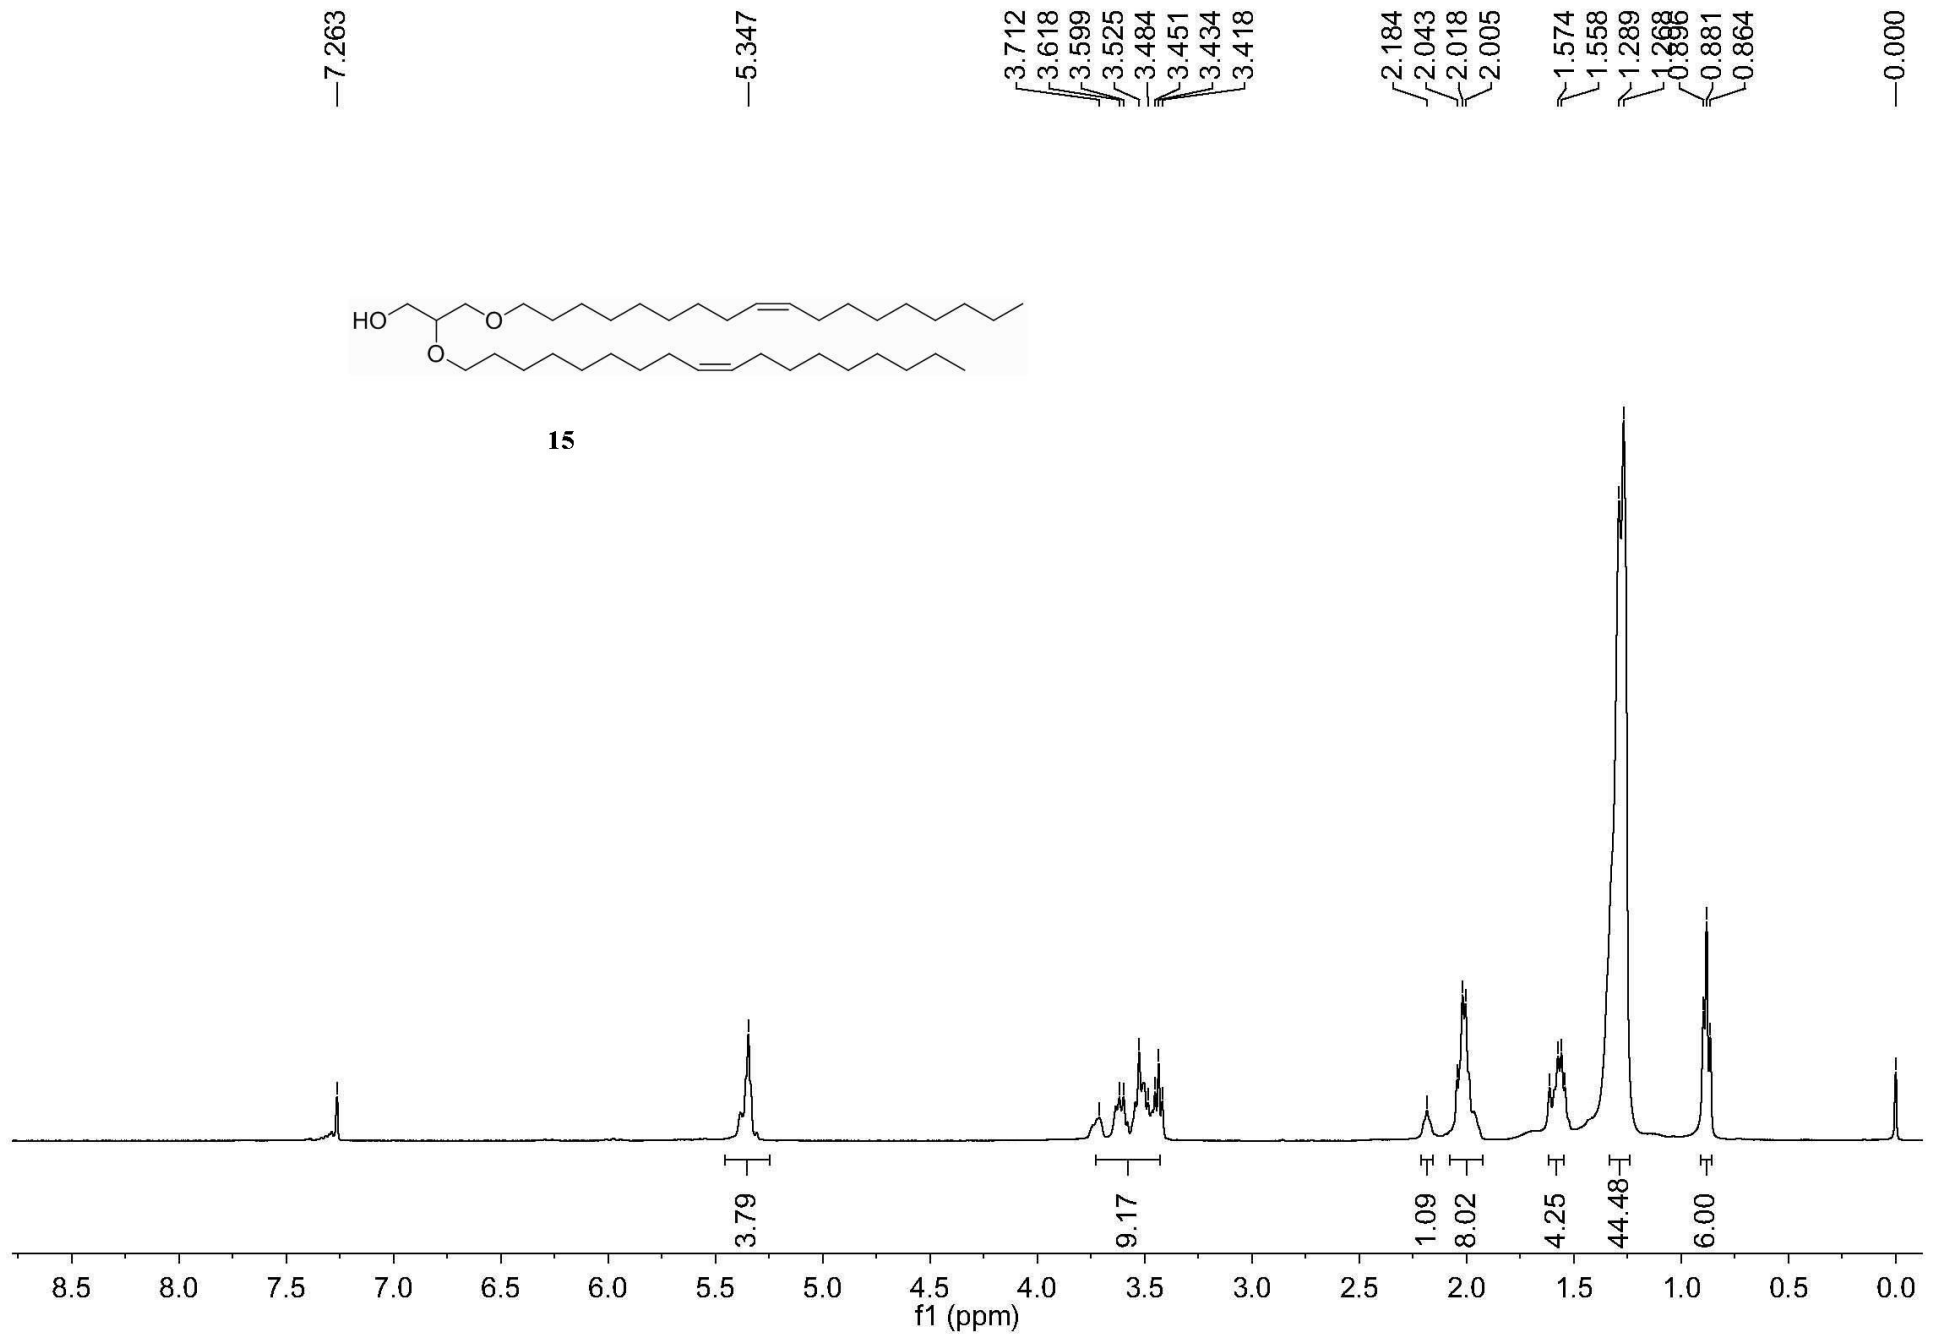

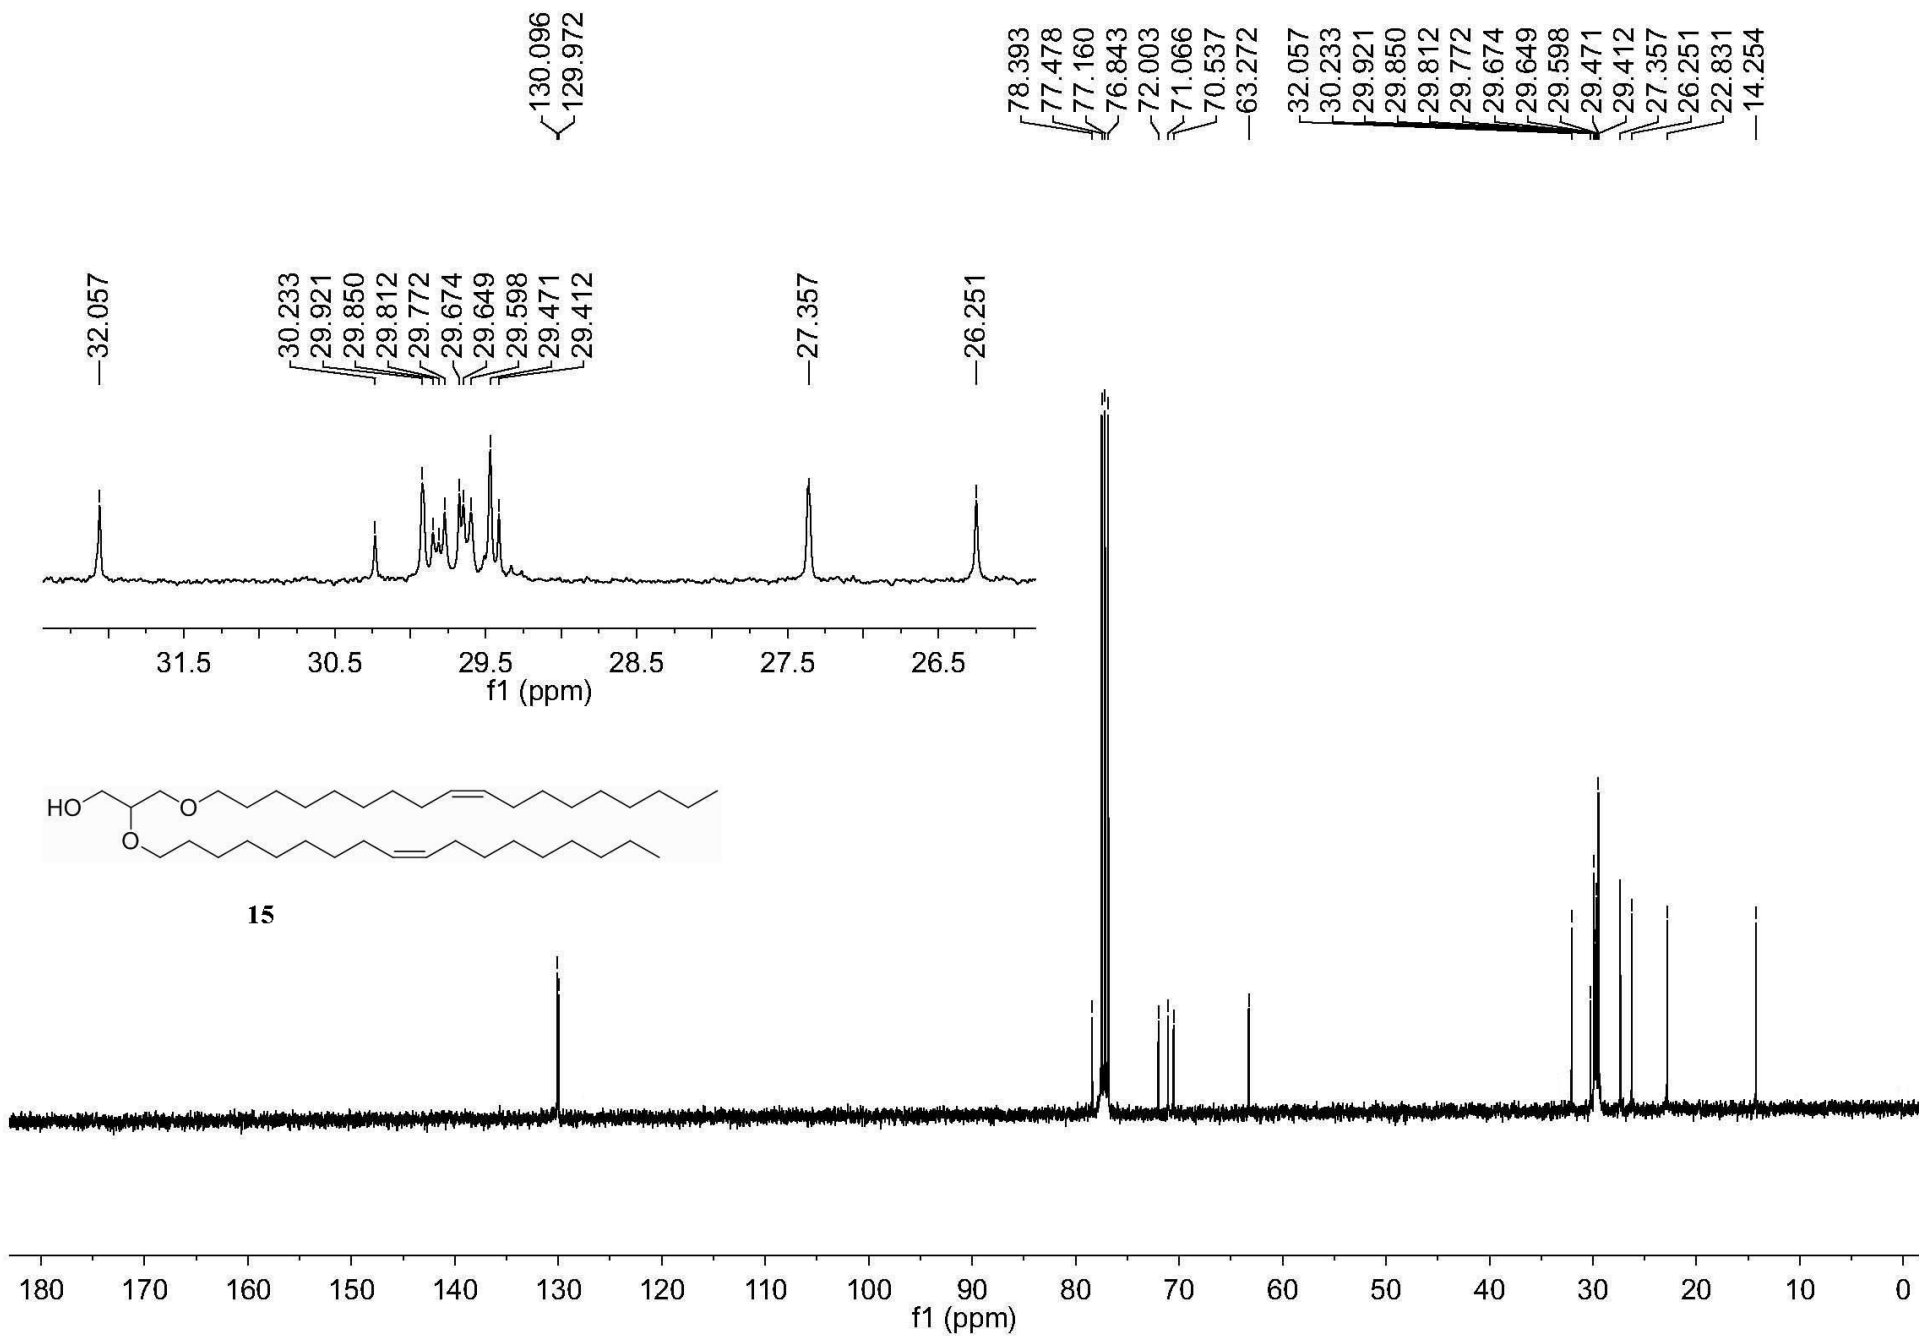

Supplement: c4cc07538b1.pdf [file c4cc07538b1.pdf]
